# Supplementary material
Source: MDPI journal article supplement (https://www.mdpi.com/2073-4395/12/3/612)
Supplement: s1 [file s1]

Table S5: Phenotype of three heat tolerant accessions as observed in the glasshouse. 1a-c: flowers, 2a-c: pods, 3 a-c: beans. For more information please visit [www.genbank.at](http://www.genbank.at)

|   | 32<br>BVAL-610181                                                                                                           | 67<br>BVAL-610348                                                                                         | 82<br>BVAL-610637                                                                                                      |
|---|-----------------------------------------------------------------------------------------------------------------------------|-----------------------------------------------------------------------------------------------------------|------------------------------------------------------------------------------------------------------------------------|
| 1 |  <p>(a)<br/>Red</p>                        |  <p>(b)<br/>White</p>   |  <p>(c)<br/>Red</p>                 |
| 2 |  <p>(a)</p>                               |  <p>(b)</p>            |  <p>(c)</p>                        |
| 3 |  <p>(a)<br/>Purple with little black</p> |  <p>(b)<br/>White</p> |  <p>(c)<br/>Purple with black</p> |
