# Supplementary material
Source: MDPI journal article supplement (https://www.mdpi.com/2073-4395/12/3/612)
Supplement: s1 [file s1]

Archive with 27 entries (27 files):
- Figure S1 Heat and flowers 2018.png
- Figure S10 RAD_1340_7.png
- Figure S11 RAD_1525_41.png
- Figure S12 RAD_1534_20.png
- Figure S13 RAD_2111_42.png
- Figure S14 RAD_2341_68.png
- Figure S15 RAD_2589_39.png
- Figure S16 RAD_3146_19.png
- Figure S17 RAD_3232_18.png
- Figure S18 RAD_3235_24.png
- Figure S19 RAD_3342_71.png
- Figure S2 Heat and flowers 2020.png
- Figure S20 RAD_3432_30.png
- Figure S21 RAD_3517_34.png
- Figure S22 RAD_4014_50.png
- Figure S23 Phenotypes of heat tolerant accessions.pdf
- Figure S3 Correlation.png
- Figure S4 Individual Dendrogram.png
- Figure S5 RAD_220_83.png
- Figure S6 RAD_414_35.png
- Figure S7 RAD_611_31.png
- Figure S8 RAD_1199_80.png
- Figure S9 RAD_1289_78.png
- Table S1 Genotypes.xlsx
- Table S2 RADseq Data Analysis.xlsx
- Table S3 RemovedRetainedLoci.xlsx
- Table S4 Literature SNPs.xlsx
