# Supplementary material
Source: MDPI journal article supplement (https://www.mdpi.com/2073-4395/12/3/612)
Supplement: s1 [file s1 › Table S1 Genotypes.xlsx]

## Sheet: Tabelle1
General data				Collection data				Descriptive data		Genotyping/Phenotyping				Genotyping	Phenotyping 2018								Phenotyping 2020
No.	ID	Genotype	Origin	Collection country	Collection side	GPS Latitude	GPS Longitude	Main colour IPGRI	Secondary colour IPGRI	Genotyped 2018	Phenotyped 2018	Genotyped 2020	Phenotyped 2020	Estimated heat tolerance	Total_MaxF	Total_NoF	Final_NoP	Total_MaxP	NoB_per_P	Total_NoB	W_B	W_per_B	%_F_Ind	Total_MaxF	Total_NoF	Final_NoMP	Total_MaxMP	%_P_Ind	Final_NoP	Total_MaxP	NoB_per_P	Total_NoB	W_B	W_per_B
1	BVAL-610108	Accession	Gene bank AGES	AUT	Breitenfeld	47°12	15°31	Brown	Brown	Yes	Yes	No	No	0.73	759	142	36	48	2.22222	80	88.76	1.1095	NA	NA	NA	NA	NA	NA	NA	NA	NA	NA	NA	NA
2	BVAL-610109	Accession	Gene bank AGES	AUT	Breitenfeld	47°12	15°31	Cream	Brown	Yes	No	No	Yes	0.53	NA	NA	NA	NA	NA	NA	NA	NA	0.666667	142	38	8	8	0	0	0	0	0	0	0
3	BVAL-610110	Accession	Gene bank AGES	AUT	Breitenfeld	47°12	15°31	Cream	Brown	Yes	No	No	No	0.62	NA	NA	NA	NA	NA	NA	NA	NA	NA	NA	NA	NA	NA	NA	NA	NA	NA	NA	NA	NA
4	BVAL-610112	Accession	Gene bank AGES	AUT	Wolfsberg	46°56	15°39	Cream	Brown	Yes	Yes	No	Yes	0.45	141	30	1	2	1	1	1.17	1.17	0.5	96	37	1	2	0	0	0	0	0	0	0
5	BVAL-610113	Accession	Gene bank AGES	AUT	Wolfsberg	46°56	15°39	Cream	Brown	Yes	No	No	No	0.48	NA	NA	NA	NA	NA	NA	NA	NA	NA	NA	NA	NA	NA	NA	NA	NA	NA	NA	NA	NA
6	BVAL-610124	Accession	Gene bank AGES	AUT	Mettersdorf	46°48	15°42	Purple	Black	Yes	Yes	Yes	Yes	0.6	304	72	20	47	3.4	68	69.19	1.0175	1	241	57	15	15	0	0	0	0	0	0	0
7	BVAL-610125	Accession	Gene bank AGES	AUT	Mettersdorf	46°48	15°42	Cream	Brown	Yes	No	No	No	0.56	NA	NA	NA	NA	NA	NA	NA	NA	NA	NA	NA	NA	NA	NA	NA	NA	NA	NA	NA	NA
8	BVAL-610130	Accession	Gene bank AGES	AUT	St. Nikolai	46°48	15°39	Purple	Black	Yes	No	No	Yes	0.52	NA	NA	NA	NA	NA	NA	NA	NA	1	112	33	4	4	0	0	0	0	0	0	0
9	BVAL-610131	Accession	Gene bank AGES	AUT	St. Nikolai	46°48	15°39	Cream	Brown	Yes	No	No	No	0.41	NA	NA	NA	NA	NA	NA	NA	NA	NA	NA	NA	NA	NA	NA	NA	NA	NA	NA	NA	NA
10	BVAL-610135	Accession	Gene bank AGES	AUT	St. Peter	46°48	15°45	Purple	Black	Yes	No	No	Yes	0.4	NA	NA	NA	NA	NA	NA	NA	NA	0.666667	143	42	0	0	0	0	0	0	0	0	0
11	BVAL-610137	Accession	Gene bank AGES	AUT	St. Peter	46°48	15°45	Cream	Brown	Yes	No	No	No	0.58	NA	NA	NA	NA	NA	NA	NA	NA	NA	NA	NA	NA	NA	NA	NA	NA	NA	NA	NA	NA
12	BVAL-610138	Accession	Gene bank AGES	AUT	St. Peter	46°48	15°45	Purple	Black	Yes	Yes	No	No	0.45	337	81	2	14	1	2	2.65	1.325	NA	NA	NA	NA	NA	NA	NA	NA	NA	NA	NA	NA
13	BVAL-610140	Accession	Gene bank AGES	AUT	St. Peter	46°48	15°45	Purple	Black	Yes	No	No	Yes	0.46	NA	NA	NA	NA	NA	NA	NA	NA	0.166667	2	1	0	0	0	0	0	0	0	0	0
14	BVAL-610141	Accession	Gene bank AGES	AUT	St. Peter	46°48	15°45	Cream	Brown	Yes	No	No	No	0.48	NA	NA	NA	NA	NA	NA	NA	NA	NA	NA	NA	NA	NA	NA	NA	NA	NA	NA	NA	NA
15	BVAL-610142	Accession	Gene bank AGES	AUT	St. Peter	46°48	15°45	Purple	Black	Yes	No	No	No	0.43	NA	NA	NA	NA	NA	NA	NA	NA	NA	NA	NA	NA	NA	NA	NA	NA	NA	NA	NA	NA
16	BVAL-610143	Accession	Gene bank AGES	AUT	St. Peter	46°48	15°45	Cream	Brown	Yes	Yes	No	No	0.49	157	49	4	8	3	12	9.61	0.800833	NA	NA	NA	NA	NA	NA	NA	NA	NA	NA	NA	NA
17	BVAL-610144	Accession	Gene bank AGES	AUT	St. Peter	46°48	15°45	White	None	Yes	No	No	Yes	0.54	NA	NA	NA	NA	NA	NA	NA	NA	0.5	39	11	2	2	0	0	0	0	0	0	0
18	BVAL-610145	Accession	Gene bank AGES	AUT	St. Peter	46°48	15°45	Cream	Brown	Yes	No	No	No	0.61	NA	NA	NA	NA	NA	NA	NA	NA	NA	NA	NA	NA	NA	NA	NA	NA	NA	NA	NA	NA
19	BVAL-610146	Accession	Gene bank AGES	AUT	St. Peter	46°48	15°45	Cream	Brown	Yes	Yes	No	No	0.54	307	62	12	32	1.83333	22	24.5	1.11364	NA	NA	NA	NA	NA	NA	NA	NA	NA	NA	NA	NA
20	BVAL-610147	Accession	Gene bank AGES	AUT	St. Peter	46°48	15°45	Purple	Black	Yes	No	No	Yes	0.5	NA	NA	NA	NA	NA	NA	NA	NA	1	112	36	0	0	0	0	0	0	0	0	0
21	BVAL-610150	Accession	Gene bank AGES	AUT	Vogau	46°43	15°36	Cream	Brown	Yes	No	No	Yes	0.6	NA	NA	NA	NA	NA	NA	NA	NA	0.833333	181	35	9	11	0.166667	1	2	1	1	0.17	0.17
22	BVAL-610151	Accession	Gene bank AGES	AUT	Vogau	46°43	15°36	Cream	Brown	Yes	No	No	Yes	0.58	NA	NA	NA	NA	NA	NA	NA	NA	0.833333	332	78	22	24	0.166667	1	1	1	1	0.4	0.4
23	BVAL-610158	Accession	Gene bank AGES	AUT	Vogau	46°43	15°36	Cream	Brown	Yes	No	No	Yes	0.49	NA	NA	NA	NA	NA	NA	NA	NA	0.833333	285	56	5	7	0.333333	5	5	1.4	7	4.9	0.7
24	BVAL-610159	Accession	Gene bank AGES	AUT	Vogau	46°43	15°36	Purple	Black	Yes	No	No	Yes	0.33	NA	NA	NA	NA	NA	NA	NA	NA	1	387	93	5	18	0.333333	3	6	1.66667	5	1.96	0.392
25	BVAL-610160	Accession	Gene bank AGES	AUT	Vogau	46°43	15°36	White	None	Yes	No	No	No	0.32	NA	NA	NA	NA	NA	NA	NA	NA	NA	NA	NA	NA	NA	NA	NA	NA	NA	NA	NA	NA
26	BVAL-610161	Accession	Gene bank AGES	AUT	Vogau	46°43	15°36	Purple	Black	Yes	No	No	No	0.36	NA	NA	NA	NA	NA	NA	NA	NA	NA	NA	NA	NA	NA	NA	NA	NA	NA	NA	NA	NA
27	BVAL-610162	Accession	Gene bank AGES	AUT	Vogau	46°43	15°36	Cream	Brown	Yes	No	No	No	0.57	NA	NA	NA	NA	NA	NA	NA	NA	NA	NA	NA	NA	NA	NA	NA	NA	NA	NA	NA	NA
28	BVAL-610172	Accession	Gene bank AGES	AUT	Eichberg	46°41	15°24	Cream	Brown	Yes	No	No	No	0.39	NA	NA	NA	NA	NA	NA	NA	NA	NA	NA	NA	NA	NA	NA	NA	NA	NA	NA	NA	NA
29	BVAL-610173	Accession	Gene bank AGES	AUT	Maltschach	46°40	15°25	Purple	Black	Yes	Yes	No	No	0.44	401	105	17	25	1.88235	32	29.91	0.934688	NA	NA	NA	NA	NA	NA	NA	NA	NA	NA	NA	NA
30	BVAL-610174	Accession	Gene bank AGES	AUT	Maltschach	46°40	15°25	White	None	Yes	No	No	No	0.42	NA	NA	NA	NA	NA	NA	NA	NA	NA	NA	NA	NA	NA	NA	NA	NA	NA	NA	NA	NA
31	BVAL-610180	Accession	Gene bank AGES	AUT	Klausen	46°54	15°53	Purple	Black	Yes	No	No	Yes	0.65	NA	NA	NA	NA	NA	NA	NA	NA	0.5	105	26	0	5	0.333333	1	2	2	2	0.08	0.04
32	BVAL-610181	Accession	Gene bank AGES	AUT	Klausen	46°54	15°53	Purple	Black	Yes	Yes	Yes	Yes	0.63	284	74	20	38	3.35	67	53.04	0.791642	0.833333	410	74	6	12	0.166667	4	9	2.75	11	4.53	0.411818
34	BVAL-610183	Accession	Gene bank AGES	AUT	Klausen	46°54	15°53	Black	None	Yes	Yes	No	No	0.55	320	110	2	9	3	6	5.26	0.876667	NA	NA	NA	NA	NA	NA	NA	NA	NA	NA	NA	NA
35	BVAL-610184	Accession	Gene bank AGES	AUT	Klausen	46°54	15°53	Cream	Brown	Yes	No	No	Yes	0.48	NA	NA	NA	NA	NA	NA	NA	NA	1	308	73	0	3	0.166667	0	1	0	0	0	0
36	BVAL-610192	Accession	Gene bank AGES	AUT	Feldbach	46°57	15°53	White	None	Yes	No	No	Yes	0.56	NA	NA	NA	NA	NA	NA	NA	NA	0.666667	64	19	0	1	0	0	0	0	0	0	0
37	BVAL-610194	Accession	Gene bank AGES	AUT	Feldbach	46°57	15°53	Purple	Black	Yes	No	No	No	0.42	NA	NA	NA	NA	NA	NA	NA	NA	NA	NA	NA	NA	NA	NA	NA	NA	NA	NA	NA	NA
38	BVAL-610195	Accession	Gene bank AGES	AUT	Misselsdorf	46°43	15°47	White	None	Yes	No	No	Yes	0.51	NA	NA	NA	NA	NA	NA	NA	NA	0.666667	104	29	7	11	0.166667	2	2	1	2	0.72	0.36
39	BVAL-610196	Accession	Gene bank AGES	AUT	Misselsdorf	46°43	15°47	Cream	Brown	Yes	No	No	No	0.38	NA	NA	NA	NA	NA	NA	NA	NA	NA	NA	NA	NA	NA	NA	NA	NA	NA	NA	NA	NA
40	BVAL-610197	Accession	Gene bank AGES	AUT	Misselsdorf	46°43	15°47	Purple	Black	Yes	Yes	Yes	Yes	0.51	397	102	19	34	2.52632	48	56.48	1.17667	0.833333	343	82	18	18	0.166667	1	1	2	2	1.18	0.59
41	BVAL-610198	Accession	Gene bank AGES	AUT	Misselsdorf	46°43	15°47	Purple	Black	Yes	No	No	No	0.5	NA	NA	NA	NA	NA	NA	NA	NA	NA	NA	NA	NA	NA	NA	NA	NA	NA	NA	NA	NA
42	BVAL-610199	Accession	Gene bank AGES	AUT	Misselsdorf	46°43	15°47	Purple	Black	Yes	No	No	Yes	0.4	NA	NA	NA	NA	NA	NA	NA	NA	0.833333	324	61	5	6	0	0	0	0	0	0	0
43	BVAL-610200	Accession	Gene bank AGES	AUT	Misselsdorf	46°43	15°47	Purple	Black	Yes	No	No	Yes	0.43	NA	NA	NA	NA	NA	NA	NA	NA	0.833333	300	74	0	6	0	0	0	0	0	0	0
44	BVAL-610204	Accession	Gene bank AGES	AUT	Unterpurkla	46°43	15°54	Purple	Black	Yes	No	No	No	0.54	NA	NA	NA	NA	NA	NA	NA	NA	NA	NA	NA	NA	NA	NA	NA	NA	NA	NA	NA	NA
45	BVAL-610215	Accession	Gene bank AGES	AUT	St. Anna	46°51	15°57	Purple	Black	Yes	Yes	No	No	0.41	185	46	2	2	1	2	1.45	0.725	NA	NA	NA	NA	NA	NA	NA	NA	NA	NA	NA	NA
46	BVAL-610216	Accession	Gene bank AGES	AUT	St. Anna	46°51	15°57	Purple	Black	Yes	No	No	No	0.6	NA	NA	NA	NA	NA	NA	NA	NA	NA	NA	NA	NA	NA	NA	NA	NA	NA	NA	NA	NA
47	BVAL-610218	Accession	Gene bank AGES	AUT	St. Anna	46°51	15°57	Cream	Brown	Yes	No	No	No	0.41	NA	NA	NA	NA	NA	NA	NA	NA	NA	NA	NA	NA	NA	NA	NA	NA	NA	NA	NA	NA
48	BVAL-610248	Accession	Gene bank AGES	AUT	Lebring	46°51	15°21	Cream	Brown	Yes	No	No	Yes	0.52	NA	NA	NA	NA	NA	NA	NA	NA	0.333333	84	18	0	0	0	0	0	0	0	0	0
49	BVAL-610249	Accession	Gene bank AGES	AUT	Lebring	46°51	15°21	Cream	Brown	Yes	No	No	Yes	0.59	NA	NA	NA	NA	NA	NA	NA	NA	1	78	34	8	9	0.166667	2	2	2.5	5	4.39	0.878
50	BVAL-610250	Accession	Gene bank AGES	AUT	Lebring	46°51	15°21	Cream	Brown	Yes	Yes	Yes	Yes	0.51	382	83	19	44	2.84211	54	48.92	0.905926	1	312	59	0	0	0	0	0	0	0	0	0
51	BVAL-610251	Accession	Gene bank AGES	AUT	Lebring	46°51	15°21	White	None	Yes	No	No	No	0.55	NA	NA	NA	NA	NA	NA	NA	NA	NA	NA	NA	NA	NA	NA	NA	NA	NA	NA	NA	NA
52	BVAL-610252	Accession	Gene bank AGES	AUT	Lebring	46°51	15°21	Purple	Black	Yes	No	No	No	0.52	NA	NA	NA	NA	NA	NA	NA	NA	NA	NA	NA	NA	NA	NA	NA	NA	NA	NA	NA	NA
53	BVAL-610258	Accession	Gene bank AGES	AUT	St. Nikolai	46°49	15°27	Black	None	Yes	Yes	No	No	0.61	543	118	15	24	2.06667	31	34.87	1.12484	NA	NA	NA	NA	NA	NA	NA	NA	NA	NA	NA	NA
54	BVAL-610259	Accession	Gene bank AGES	AUT	St. Nikolai	46°49	15°27	Purple	Black	Yes	Yes	No	No	0.5	517	120	3	22	2.66667	8	6.7	0.8375	NA	NA	NA	NA	NA	NA	NA	NA	NA	NA	NA	NA
55	BVAL-610260	Accession	Gene bank AGES	AUT	St. Nikolai	46°49	15°27	Brown	None	Yes	No	No	Yes	0.5	NA	NA	NA	NA	NA	NA	NA	NA	1	160	32	7	7	0.166667	1	1	3	3	5.09	1.69667
56	BVAL-610261	Accession	Gene bank AGES	AUT	St. Nikolai	46°49	15°27	Cream	Brown	Yes	No	No	No	0.49	NA	NA	NA	NA	NA	NA	NA	NA	NA	NA	NA	NA	NA	NA	NA	NA	NA	NA	NA	NA
57	BVAL-610274	Accession	Gene bank AGES	AUT	St. Nikolai	46°49	15°27	Cream	Brown	Yes	No	No	No	0.69	NA	NA	NA	NA	NA	NA	NA	NA	NA	NA	NA	NA	NA	NA	NA	NA	NA	NA	NA	NA
58	BVAL-610285	Accession	Gene bank AGES	AUT	St. Nikolai	46°49	15°27	White	None	Yes	No	No	Yes	0.54	NA	NA	NA	NA	NA	NA	NA	NA	0.833333	490	86	12	19	0.5	7	10	2.42857	17	16.25	0.955882
59	BVAL-610301	Accession	Gene bank AGES	AUT	Groß St. Florian	46°49	15°19	White	None	Yes	Yes	Yes	Yes	0.65	386	97	37	80	2.16216	80	86.65	1.08313	0.833333	266	49	13	13	0	0	0	0	0	0	0
60	BVAL-610302	Accession	Gene bank AGES	AUT	Groß St. Florian	46°49	15°19	White	None	Yes	Yes	No	No	0.4	167	44	9	31	1.77778	16	15.03	0.939375	NA	NA	NA	NA	NA	NA	NA	NA	NA	NA	NA	NA
61	BVAL-610303	Accession	Gene bank AGES	AUT	Unterbergla/Gross St. Florian	46°48	15°18	Cream	Brown	Yes	No	No	No	0.56	NA	NA	NA	NA	NA	NA	NA	NA	NA	NA	NA	NA	NA	NA	NA	NA	NA	NA	NA	NA
62	BVAL-610329	Accession	Gene bank AGES	AUT	Oberhaag	46°41	15°20	Brown	None	Yes	No	No	No	0.66	NA	NA	NA	NA	NA	NA	NA	NA	NA	NA	NA	NA	NA	NA	NA	NA	NA	NA	NA	NA
63	BVAL-610334	Accession	Gene bank AGES	AUT	Oberhaag	46°41	15°20	Black	None	Yes	Yes	No	No	0.48	254	60	11	33	2.36364	26	21.62	0.831538	NA	NA	NA	NA	NA	NA	NA	NA	NA	NA	NA	NA
64	BVAL-610342	Accession	Gene bank AGES	AUT	Oberhaag	46°41	15°20	Purple	Black	Yes	No	No	No	0.4	NA	NA	NA	NA	NA	NA	NA	NA	NA	NA	NA	NA	NA	NA	NA	NA	NA	NA	NA	NA
65	BVAL-610345	Accession	Gene bank AGES	AUT	Oberhaag	46°41	15°20	Purple	Black	Yes	No	No	No	0.5	NA	NA	NA	NA	NA	NA	NA	NA	NA	NA	NA	NA	NA	NA	NA	NA	NA	NA	NA	NA
66	BVAL-610347	Accession	Gene bank AGES	AUT	Oberhaag	46°41	15°20	White	None	Yes	Yes	No	No	0.53	274	52	14	26	2.92857	41	50.92	1.24195	NA	NA	NA	NA	NA	NA	NA	NA	NA	NA	NA	NA
67	BVAL-610348	Accession	Gene bank AGES	ITA	Santuario Madonna di Polsi	38°08	16°04	White	None	Yes	Yes	Yes	Yes	0.62	673	152	75	123	2.61333	196	184.44	0.94102	1	716	128	13	16	0.5	4	7	1.25	5	1.91	0.382
68	BVAL-610349	Accession	Gene bank AGES	NA	NA	NA	NA	Cream	Brown	Yes	No	No	Yes	0.68	NA	NA	NA	NA	NA	NA	NA	NA	0.666667	487	83	0	2	0.166667	1	1	1	1	1.42	1.42
69	BVAL-610350	Accession (Preisgewinner)	Gene bank AGES	GDR	NA	NA	NA	Purple	Black	Yes	No	No	Yes	0.63	NA	NA	NA	NA	NA	NA	NA	NA	0.666667	98	31	6	8	0	0	0	0	0	0	0
70	BVAL_610351	Variety (Hammond's Dwarf Scarlet)	Gene bank AGES	NA	NA	NA	NA	Purple	Black	Yes	No	No	Yes	0.49	NA	NA	NA	NA	NA	NA	NA	NA	0.833333	633	117	0	5	0.666667	9	10	1.77778	16	12.8	0.8
71	BVAL-610386	Accession	Gene bank AGES	AUT	Stadtschlaining	46°48	15°12	White	None	Yes	No	No	No	0.64	NA	NA	NA	NA	NA	NA	NA	NA	NA	NA	NA	NA	NA	NA	NA	NA	NA	NA	NA	NA
72	BVAL-610387	Accession	Gene bank AGES	AUT	Stadtschlaining	46°48	15°12	Cream	Brown	Yes	No	No	No	0.62	NA	NA	NA	NA	NA	NA	NA	NA	NA	NA	NA	NA	NA	NA	NA	NA	NA	NA	NA	NA
73	BVAL-610388	Accession	Gene bank AGES	AUT	Stadtschlaining	46°48	15°12	Pink	Black	Yes	Yes	No	Yes	0.59	496	103	33	68	2.75758	91	74.95	0.823626	1	733	167	23	27	0.333333	2	2	1	2	1.31	0.655
74	BVAL-610468	Accession	Gene bank AGES	AUT	Löffelbach	47°16	15°56	Cream	Brown	Yes	No	No	Yes	0.58	NA	NA	NA	NA	NA	NA	NA	NA	0.666667	294	48	2	5	0.166667	1	1	1	1	1.3	1.3
75	BVAL-610469	Accession	Gene bank AGES	AUT	Löffelbach	47°16	15°56	Purple	Black	Yes	No	No	No	0.54	NA	NA	NA	NA	NA	NA	NA	NA	NA	NA	NA	NA	NA	NA	NA	NA	NA	NA	NA	NA
76	BVAL-610470	Accession	Gene bank AGES	AUT	Löffelbach	47°16	15°56	White	None	Yes	No	No	Yes	0.45	NA	NA	NA	NA	NA	NA	NA	NA	0.833333	90	27	0	4	0.166667	1	1	4	4	5.78	1.445
77	BVAL-610475	Accession	Gene bank AGES	CHN	Chengdu, Sichuan	30°39	104°04	White	None	Yes	Yes	No	No	0.67	335	94	11	14	3.09091	34	24.32	0.715294	NA	NA	NA	NA	NA	NA	NA	NA	NA	NA	NA	NA
78	BVAL-610487	Accession	Gene bank AGES	AUT	NA	NA	NA	Black	None	Yes	No	No	Yes	0.47	NA	NA	NA	NA	NA	NA	NA	NA	1	611	104	34	36	0.166667	5	6	1	5	5.19	1.038
79	BVAL-610547	Accession	Gene bank AGES	AUT	Styria	NA	NA	White	None	Yes	No	No	No	0.61	NA	NA	NA	NA	NA	NA	NA	NA	NA	NA	NA	NA	NA	NA	NA	NA	NA	NA	NA	NA
80	BVAL-610635	Accession	Gene bank AGES	AUT	Burgenland	NA	NA	Cream	Brown	Yes	No	No	Yes	0.46	NA	NA	NA	NA	NA	NA	NA	NA	0.833333	248	56	6	11	0.166667	1	1	1	1	1.1	1.1
82	BVAL-610637	Accession	Gene bank AGES	AUT	Burgenland	NA	NA	Purple	Black	Yes	Yes	No	Yes	0.81	536	109	70	104	2.5	175	184.45	1.054	0.833333	154	35	15	16	0.166667	2	2	3	6	6.94	1.15667
83	BVAL-610675	Accession	Gene bank AGES	AUT	Deutschlandsberg	48°09	15°12	Black	None	Yes	No	No	No	0.59	NA	NA	NA	NA	NA	NA	NA	NA	NA	NA	NA	NA	NA	NA	NA	NA	NA	NA	NA	NA
84	BVAL-610734	Accession	Gene bank AGES	PRT	Funchal, Madeira	32°39	16°54	White	None	Yes	Yes	No	No	0.44	133	39	7	12	2	14	10.3	0.735714	NA	NA	NA	NA	NA	NA	NA	NA	NA	NA	NA	NA
85	BVAL-610750	Accession	Gene bank AGES	AUT	Oberhaag	46°41	15°20	White	None	Yes	No	No	No	0.6	NA	NA	NA	NA	NA	NA	NA	NA	NA	NA	NA	NA	NA	NA	NA	NA	NA	NA	NA	NA
86	BVAL-610776	Accession	Gene bank AGES	AUT	Leonding	48°16	14°16	Black	None	Yes	No	No	Yes	0.47	NA	NA	NA	NA	NA	NA	NA	NA	1	631	151	0	0	0	0	0	0	0	0	0
87	Melange	Variety	WIES	AUT	Wies	NA	NA	Cream	Brown	Yes	Yes	No	Yes	0.54	218	54	1	2	2	2	2.76	1.38	1	214	54	4	5	0.166667	1	1	3	3	0.58	0.193333
88	Bonela	Variety	WIES	AUT	Wies	NA	NA	Purple	Black	Yes	Yes	Yes	Yes	0.56	470	104	26	47	1.73077	45	41.2	0.915556	0.666667	68	24	8	8	0.166667	1	1	2	2	2.01	1.005
89	Steirische Riesen	Variety	WIES	AUT	Wies	NA	NA	White	None	Yes	Yes	No	Yes	0.43	132	53	0	0	0	0	0	0	1	315	85	7	11	0.166667	1	1	2	2	3.6	1.8
91	Hestia	Variety	Naktuinbow	NLD	Holland Select Research BV	NA	NA	Purple	Black	Yes	Yes	No	No	0.55	231	38	5	10	2	10	6.72	0.672	NA	NA	NA	NA	NA	NA	NA	NA	NA	NA	NA	NA
92	Lady Di	Variety	Naktuinbow	NLD	Holland Select Research BV	NA	NA	Purple	Black	Yes	Yes	No	Yes	0.59	317	81	7	8	4.71429	33	28.89	0.875455	1	44	19	4	4	0.166667	1	1	3	3	1.25	0.416667
93	Hara	Variety	WIES	AUT	Wies	NA	NA	Black	None	Yes	Yes	No	Yes	0.5	582	128	31	71	2.25806	70	67.31	0.961571	0.833333	123	40	5	5	0	0	0	0	0	0	0
94	Choco	Variety	WIES	AUT	Wies	NA	NA	Brown	None	Yes	Yes	No	Yes	0.51	162	48	2	10	2.5	5	3.83	0.766	0.5	15	5	0	0	0	0	0	0	0	0	0
95	Hellviolette	Variety	WIES	AUT	Wies	NA	NA	Purple	Black	Yes	Yes	No	Yes	0.48	327	84	8	20	3	24	22.3	0.929167	1	276	73	1	3	0	0	0	0	0	0	0
96	Aldrian	Variety	WIES	AUT	Wies	NA	NA	Cream	Brown	Yes	Yes	No	Yes	0.48	231	59	5	17	2	10	12.08	1.208	1	175	43	0	0	0	0	0	0	0	0	0
97	Prijswinner	Variety	Naktuinbow	NLD	Holland Select Research BV	NA	NA	Purple	Black	Yes	Yes	No	No	0.53	109	25	8	13	3	24	15.4	0.641667	NA	NA	NA	NA	NA	NA	NA	NA	NA	NA	NA	NA
100	BVAL-610392	Accession	Gene bank AGES	AUT	Allersdorf	47°18	16°19	Purple	Black	No	No	Yes	Yes	0.52	NA	NA	NA	NA	NA	NA	NA	NA	0.666667	59	20	1	1	0	0	0	0	0	0	0
101	BVAL-610393	Accession	Gene bank AGES	AUT	Alersdorf	47°18	16°19	White	None	No	No	Yes	Yes	0.65	NA	NA	NA	NA	NA	NA	NA	NA	1	551	119	0	3	0	0	0	0	0	0	0
102	BVAL-610413	Accession	Gene bank AGES	AUT	Podgoria	46°34	13°35	White	None	No	No	Yes	Yes	0.75	NA	NA	NA	NA	NA	NA	NA	NA	1	662	102	13	30	0.666667	11	13	1.45455	16	8.25	0.515625
103	BVAL-610419	Accession	Gene bank AGES	AUT	Althodis	47°18	16°22	White	None	No	No	Yes	Yes	0.52	NA	NA	NA	NA	NA	NA	NA	NA	1	375	81	0	2	0.166667	1	1	2	2	2.97	1.485
104	BVAL-610457	Accession	Gene bank AGES	AUT	Gschmaier	47°07	15°53	Purple	Black	No	No	Yes	Yes	0.48	NA	NA	NA	NA	NA	NA	NA	NA	0.666667	117	31	8	8	0	0	0	0	0	0	0
107	BVAL-610488	Accession	Gene bank AGES	AUT	NA	NA	NA	Purple	Black	No	No	Yes	Yes	0.51	NA	NA	NA	NA	NA	NA	NA	NA	0.833333	282	49	6	6	0.5	4	4	1.5	6	5.52	0.92
108	BVAL-610489	Accession	Gene bank AGES	AUT	NA	NA	NA	Cream	None	No	No	Yes	Yes	0.66	NA	NA	NA	NA	NA	NA	NA	NA	1	300	64	7	11	0.166667	1	1	1	1	2.21	2.21
110	BVAL-610531	Accession	Gene bank AGES	HUN	Budapest	47°30	19°02	Purple	Black	No	No	Yes	Yes	0.6	NA	NA	NA	NA	NA	NA	NA	NA	0.666667	319	42	9	22	0.666667	13	14	2.23077	29	26.76	0.922759
111	BVAL-610619	Accession	Gene bank AGES	AUT	Deutschlandsberg	46°48	15°12	Black	None	No	No	Yes	Yes	0.64	NA	NA	NA	NA	NA	NA	NA	NA	0.833333	346	56	16	16	0.166667	1	1	1	1	1.9	1.9
112	BVAL-610627	Accession	Gene bank AGES	AUT	St. Michael	47°20	15°01	Black	None	No	No	Yes	Yes	0.57	NA	NA	NA	NA	NA	NA	NA	NA	1	265	59	12	13	0	0	0	0	0	0	0
113	BVAL-610634	Accession	Gene bank AGES	AUT	Burgenland	NA	NA	Cream	Brown	No	No	Yes	Yes	0.53	NA	NA	NA	NA	NA	NA	NA	NA	0.833333	423	74	12	29	0.333333	6	6	1.33333	8	7.6	0.95
114	BVAL-610639	Accession	Gene bank AGES	AUT	Burgenland	NA	NA	White	None	No	No	Yes	Yes	0.68	NA	NA	NA	NA	NA	NA	NA	NA	0.666667	303	54	1	6	0.333333	4	5	2.5	10	10.01	1.001
115	BVAL-610648	Accession	Gene bank AGES	AUT	Burgenland	NA	NA	Purple	Black	No	No	Yes	Yes	0.62	NA	NA	NA	NA	NA	NA	NA	NA	1	288	70	36	36	0.166667	1	1	3	3	1.05	0.35
116	BVAL-610649	Accession	Gene bank AGES	AUT	Burgenland	NA	NA	Purple	Black	No	No	Yes	Yes	0.54	NA	NA	NA	NA	NA	NA	NA	NA	1	184	42	9	16	0.166667	3	3	1.33333	4	3.33	0.8325
117	BVAL-610650	Accession	Gene bank AGES	AUT	Burgenland	NA	NA	White	None	No	No	Yes	Yes	0.57	NA	NA	NA	NA	NA	NA	NA	NA	1	340	68	2	17	0.666667	4	8	1	4	1.83	0.4575
121	PHC-0013	Accession	Saatzucht Gleisdorf GesmbH	ESP	Pontevedra	42°43	-08°64	White	None	No	No	Yes	Yes	0.43	NA	NA	NA	NA	NA	NA	NA	NA	0.833333	392	79	9	17	0.333333	2	2	1.5	3	2.6	0.866667
122	PHC-0015	Accession	Saatzucht Gleisdorf GesmbH	ESP	Pontevedra	42°43	-08°64	White	None	No	No	Yes	Yes	0.43	NA	NA	NA	NA	NA	NA	NA	NA	0.333333	124	29	0	2	0.166667	0	2	0	0	0	0
123	B1208	Breeding line	Saatzucht Gleisdorf GesmbH	AUT	Gleisdorf	47°11	15°70	Purple	Black	No	No	Yes	Yes	0.27	NA	NA	NA	NA	NA	NA	NA	NA	0.333333	71	16	4	4	0	0	0	0	0	0	0
124	B1604	Breeding line	Saatzucht Gleisdorf GesmbH	AUT	Gleisdorf	47°11	15°70	Purple	Black	No	No	Yes	Yes	0.68	NA	NA	NA	NA	NA	NA	NA	NA	1	214	52	46	47	0.166667	4	4	2.75	11	10.74	0.976364
