# Supplementary material
Source: MDPI journal article supplement (https://www.mdpi.com/2073-4395/12/3/612)
Supplement: s1 [file s1 › Table S2 RADseq Data Analysis.xlsx]

## Sheet: Tabelle1
		BioProject data		FastQC statistics		ipyrad statistics
Sample	Genotype	Accession	SRA	Unique reads	Duplicate reads	Total raw reads	Reads passed filter	Total clusters	Clusters passed filter	Estimated heterozygosity	Sequencing error rate	Consens reads	Loci in assembly
01_1	BVAL-610108	SAMN23454734	SRR17043981	130447	2456828	2587275	2586885	44066	34528	0.002874	0.001267	33856	2917
01_2		SAMN23454735	SRR17043980	117191	2121554	2238745	2238395	39611	29971	0.002936	0.001237	29396	2700
01_3		SAMN23454736	SRR17043869	121759	2275499	2397258	2396858	41838	31265	0.00279	0.001238	30657	2754
01_4		SAMN23454737	SRR17043758	121805	2162577	2284382	2284046	41920	33049	0.002157	0.001207	32526	2622
01_5		SAMN23454738	SRR17044243	237811	5138137	5375948	5375134	57007	49118	0.004131	0.001309	47763	3798
01_6		SAMN23454739	SRR17044132	93412	1442239	1535651	1535432	40956	23456	0.002636	0.001259	23036	2218
01_7		SAMN23454740	SRR17044021	119945	2142928	2262873	2262499	41102	29755	0.002862	0.001263	29194	2717
01_8		SAMN23454741	SRR17044363	238615	8072773	8311388	8310165	63985	55992	0.004174	0.001214	54228	3991
02_1	BVAL-610109	SAMN23454742	SRR17044301	120452	1945491	2065943	2065607	52420	46208	0.00522	0.001448	44874	3741
02_2		SAMN23454743	SRR17044290	179703	3743915	3923618	3922737	62738	56531	0.00568	0.001575	54615	4080
02_3		SAMN23454744	SRR17043979	175566	3645990	3821556	3820710	63393	57445	0.005168	0.001437	55548	4121
02_4		SAMN23454745	SRR17043968	198487	4491866	4690353	4689337	65309	59448	0.005732	0.00146	57358	4140
02_5		SAMN23454746	SRR17043957	205599	4968789	5174388	5173277	66738	60385	0.005344	0.001424	58280	4156
02_6		SAMN23454747	SRR17043946	158053	3334152	3492205	3491458	60644	54683	0.004806	0.00145	53037	4041
02_7		SAMN23454748	SRR17043935	198917	4327559	4526476	4525520	65049	59010	0.005729	0.001397	57031	4145
02_8		SAMN23454749	SRR17043924	195683	4258789	4454472	4453516	65571	59021	0.005259	0.001388	56961	4148
03_1	BVAL-610110	SAMN23454750	SRR17043913	103064	1558893	1661957	1661600	49179	41876	0.005289	0.001583	40668	3538
03_2		SAMN23454751	SRR17043902	94972	1410269	1505241	1504927	47226	40443	0.005312	0.001743	39269	3437
03_3		SAMN23454752	SRR17043891	134319	2289574	2423893	2423349	56139	49304	0.006116	0.001501	47714	3842
03_4		SAMN23454753	SRR17043880	186983	3946603	4133586	4132676	63977	57730	0.005362	0.00145	55742	4119
03_5		SAMN23454754	SRR17043868	162971	3191560	3354531	3353751	61347	54973	0.006014	0.001562	53053	4040
03_6		SAMN23454755	SRR17043857	171974	3574408	3746382	3745522	63915	57496	0.00624	0.001431	55498	4088
03_7		SAMN23454756	SRR17043846	143537	2365209	2508746	2508205	57537	50938	0.004991	0.001579	49344	3904
03_8		SAMN23454757	SRR17043835	164994	3343624	3508618	3507859	62893	56055	0.00511	0.0015	54185	4058
04_1	BVAL-610112	SAMN23454758	SRR17043824	153865	2826158	2980023	2979592	55788	45360	0.003493	0.001286	44284	3785
04_2		SAMN23454759	SRR17043813	217494	7210516	7428010	7426886	70149	61625	0.005097	0.001322	59489	4150
04_3		SAMN23454760	SRR17043802	129655	2012498	2142153	2141833	57013	39690	0.003721	0.001371	38764	3399
04_4		SAMN23454761	SRR17043791	123735	1811137	1934872	1934597	51921	37303	0.003019	0.001333	36532	3259
04_5		SAMN23454762	SRR17043780	224649	4424427	4649076	4648323	62861	54257	0.004117	0.001333	52760	4042
04_6		SAMN23454763	SRR17043769	188760	3653929	3842689	3842103	59990	50965	0.003928	0.00133	49643	3882
04_7		SAMN23454764	SRR17043757	159519	3065116	3224635	3224125	58265	47952	0.004069	0.001324	46747	3837
04_8		SAMN23454765	SRR17043746	122539	1721435	1843974	1843676	53496	38353	0.003649	0.001376	37470	3263
05_1	BVAL-610113	SAMN23454766	SRR17043735	160830	3325363	3486193	3485440	60281	53842	0.005046	0.001471	52138	4078
05_2		SAMN23454767	SRR17043724	155947	3050062	3206009	3205318	61325	54726	0.005549	0.001527	52856	4051
05_3		SAMN23454768	SRR17043713	121970	2056164	2178134	2177653	52860	45116	0.004582	0.001493	43874	3766
05_4		SAMN23454769	SRR17043702	126387	2055490	2181877	2181439	55178	47795	0.005538	0.001561	46324	3829
05_5		SAMN23454770	SRR17043691	150115	2982081	3132196	3131488	59654	52054	0.004922	0.001467	50438	4001
05_6		SAMN23454771	SRR17044276	150680	3027091	3177771	3177076	60340	52418	0.005575	0.001542	50824	3959
05_7		SAMN23454772	SRR17044265	85571	1178283	1263854	1263590	45369	36479	0.004832	0.001621	35503	3211
05_8		SAMN23454773	SRR17044254	143720	2582419	2726139	2725561	57892	50422	0.005467	0.001496	48829	3875
06_1	BVAL-610124	SAMN23454774	SRR17044242	120115	1810430	1930545	1930254	48198	39676	0.003444	0.001375	38732	3268
06_2		SAMN23454775	SRR17044231	157549	2830070	2987619	2987114	57366	47723	0.004112	0.001355	46483	3814
06_3		SAMN23454776	SRR17044220	126697	2133676	2260373	2260030	48987	40699	0.003878	0.001334	39770	3384
06_4		SAMN23454777	SRR17044209	129894	2191265	2321159	2320809	52581	41962	0.003759	0.001348	41002	3538
06_5		SAMN23454778	SRR17044198	97286	1301418	1398704	1398500	48145	30401	0.003983	0.001429	29648	2624
06_6		SAMN23454779	SRR17044187	167245	3224706	3391951	3391433	59313	49337	0.003395	0.001332	48170	3857
06_7		SAMN23454780	SRR17044176	45704	198305	244009	243971	35145	4999	0.003808	0.001555	4847	616
06_8		SAMN23454781	SRR17044165	215496	7265243	7480739	7479540	70570	63221	0.004686	0.001258	61261	4151
07_1	BVAL-610125	SAMN23454782	SRR17044154	102959	1683344	1786303	1785935	50418	43426	0.005656	0.001476	42094	3630
07_2		SAMN23454783	SRR17044143	164229	3347153	3511382	3510646	62160	55562	0.005314	0.001464	53653	4074
07_3		SAMN23454784	SRR17044131	125695	2108993	2234688	2234208	55171	46880	0.005176	0.00148	45431	3777
07_4		SAMN23454785	SRR17044120	110357	1728151	1838508	1838096	51658	42755	0.00573	0.001642	41404	3606
07_5		SAMN23454786	SRR17044109	126089	2019980	2146069	2145589	55228	46718	0.005319	0.001588	45235	3806
07_6		SAMN23454787	SRR17044098	111073	1529336	1640409	1640045	51698	43024	0.005339	0.001683	41776	3600
07_7		SAMN23454788	SRR17044087	197858	4174244	4372102	4371146	66580	59215	0.005974	0.00151	57083	4107
07_8		SAMN23454789	SRR17044076	123785	1826729	1950514	1950081	54821	46558	0.005198	0.001657	45142	3743
08_1	BVAL-610130	SAMN23454790	SRR17044065	99430	1560696	1660126	1659723	48154	40963	0.005516	0.00158	39731	3493
08_2		SAMN23454791	SRR17044054	200993	5216758	5417751	5416584	67165	60333	0.006113	0.001437	58113	4144
08_3		SAMN23454792	SRR17044043	159631	3399841	3559472	3558731	61510	55301	0.005595	0.001421	53467	4056
08_4		SAMN23454793	SRR17044032	123779	1869300	1993079	1992646	53019	45545	0.005067	0.001556	44215	3738
08_5		SAMN23454794	SRR17044020	70665	909935	980600	980389	39524	29487	0.004776	0.001627	28762	2698
08_6		SAMN23454795	SRR17044009	105771	1587960	1693731	1693343	51768	42858	0.005133	0.001574	41667	3528
08_7		SAMN23454796	SRR17043998	197642	4517822	4715464	4714418	66840	60112	0.006002	0.001519	57911	4120
08_8		SAMN23454797	SRR17043987	130334	2068236	2198570	2198101	55418	47505	0.004571	0.001505	46146	3724
09_1	BVAL-610131	SAMN23454798	SRR17044429	57718	659572	717290	717146	34267	24305	0.004382	0.001693	23754	2323
09_2		SAMN23454799	SRR17044418	38195	325670	363865	363782	25416	13125	0.002925	0.001556	12875	1386
09_3		SAMN23454800	SRR17044407	144920	2536641	2681561	2680931	58778	51302	0.005238	0.001486	49686	3969
09_4		SAMN23454801	SRR17044396	177845	4048876	4226721	4225776	63252	56310	0.0052	0.001462	54411	4100
09_5		SAMN23454802	SRR17044385	144097	2721332	2865429	2864761	57917	49247	0.005401	0.001623	47734	3854
09_6		SAMN23454803	SRR17044374	102671	1431207	1533878	1533533	51852	41522	0.004979	0.001762	40351	3476
09_7		SAMN23454804	SRR17044362	97621	1205933	1303554	1303280	50024	39196	0.005428	0.00178	38014	3326
09_8		SAMN23454805	SRR17044351	84606	1114395	1199001	1198723	44965	35191	0.004745	0.001708	34261	3090
10_1	BVAL-610135	SAMN23454806	SRR17044340	121561	1899084	2020645	2020195	52623	45696	0.00538	0.001588	44323	3700
10_2		SAMN23454807	SRR17044329	201070	5074475	5275545	5274451	67537	61068	0.006248	0.001435	58742	4153
10_3		SAMN23454808	SRR17044318	146643	2739218	2885861	2885257	59070	51445	0.005675	0.001519	49855	3971
10_4		SAMN23454809	SRR17044307	121260	1802858	1924118	1923694	54331	44660	0.005237	0.001614	43365	3686
10_5		SAMN23454810	SRR17044305	155996	3211200	3367196	3366456	62571	54704	0.006424	0.001576	52770	4053
10_6		SAMN23454811	SRR17044304	205594	4776319	4981913	4980741	68825	60517	0.006085	0.001548	58240	4094
10_7		SAMN23454812	SRR17044303	98754	1590478	1689232	1688862	49009	38907	0.005141	0.001647	37809	3158
10_8		SAMN23454813	SRR17044302	84636	1168004	1252640	1252366	44662	35952	0.00462	0.001641	35027	3184
11_1	BVAL-610137	SAMN23454814	SRR17044300	112194	1831563	1943757	1943338	52238	44473	0.005679	0.001502	43123	3657
11_2		SAMN23454815	SRR17044299	140366	2379973	2520339	2519771	56138	48721	0.005382	0.001524	47204	3908
11_3		SAMN23454816	SRR17044298	65551	806302	871853	871683	36542	28012	0.004919	0.001703	27310	2683
11_4		SAMN23454817	SRR17044297	157320	3037085	3194405	3193760	61451	54747	0.005891	0.001512	52876	4050
11_5		SAMN23454818	SRR17044296	144563	2464312	2608875	2608269	56914	48529	0.005164	0.001611	47012	3836
11_6		SAMN23454819	SRR17044295	145657	2776677	2922334	2921665	59716	51611	0.005628	0.001559	49960	3917
11_7		SAMN23454820	SRR17044294	185051	3820171	4005222	4004337	65622	58582	0.005763	0.001502	56485	4103
11_8		SAMN23454821	SRR17044293	90379	1278287	1368666	1368370	47797	38357	0.005265	0.001683	37271	3235
12_1	BVAL-610138	SAMN23454822	SRR17044292	109771	1727613	1837384	1837089	45999	35231	0.004006	0.001363	34415	3106
12_2		SAMN23454823	SRR17044291	175035	3469208	3644243	3643681	59207	51495	0.004569	0.001301	50037	3912
12_3		SAMN23454824	SRR17044289	127940	1991707	2119647	2119290	52081	40435	0.003721	0.001406	39446	3354
12_4		SAMN23454825	SRR17044288	186169	3439329	3625498	3624931	62248	51922	0.004426	0.001368	50510	3924
12_6		SAMN23454826	SRR17044287	158318	2996604	3154922	3154429	59425	49991	0.004608	0.001293	48590	3778
12_7		SAMN23454828	SRR17044285	89121	1354913	1444034	1443812	40768	30346	0.003699	0.001438	29625	2613
12_8		SAMN23454829	SRR17044284	220486	4298561	4519047	4518322	61216	54446	0.004402	0.001328	52775	4054
13_1	BVAL-610140	SAMN23454830	SRR17044283	143675	2486112	2629787	2629202	57236	50239	0.00593	0.001684	48593	3918
13_2		SAMN23454831	SRR17044282	194459	4436668	4631127	4630067	66242	59508	0.005754	0.001474	57337	4131
13_3		SAMN23454832	SRR17044281	150280	2863699	3013979	3013305	60697	53260	0.005951	0.001625	51448	3987
13_4		SAMN23454833	SRR17044280	198094	6111040	6309134	6307733	70429	63212	0.006582	0.001354	60569	4158
13_5		SAMN23454834	SRR17043978	196609	5115284	5311893	5310741	69471	62843	0.007258	0.00151	60229	4161
13_6		SAMN23454835	SRR17043977	226954	7859463	8086417	8084636	73547	65435	0.006	0.001344	62770	4162
13_7		SAMN23454836	SRR17043976	200563	4696619	4897182	4896084	66279	59476	0.005665	0.001497	57388	4146
13_8		SAMN23454837	SRR17043975	36120	310299	346419	346343	23855	13338	0.003141	0.001553	13073	1330
14_1	BVAL-610141	SAMN23454838	SRR17043974	143107	2320826	2463933	2463401	56662	49662	0.005391	0.001554	48106	3921
14_2		SAMN23454839	SRR17043973	192182	4004776	4196958	4196028	65863	58637	0.006027	0.001565	56438	4135
14_3		SAMN23454840	SRR17043972	148177	2705167	2853344	2852671	59133	52228	0.006342	0.001592	50480	3989
14_4		SAMN23454841	SRR17043971	107505	1758107	1865612	1865253	50689	42288	0.005437	0.001554	41053	3521
14_5		SAMN23454842	SRR17043970	160408	3258321	3418729	3417999	62451	55504	0.005867	0.001496	53574	4024
14_6		SAMN23454843	SRR17043969	155826	2968559	3124385	3123720	61046	54186	0.006551	0.001654	52280	4014
14_7		SAMN23454844	SRR17043967	219407	7227163	7446570	7444952	72190	64848	0.00602	0.001421	62163	4168
15_1	BVAL-610142	SAMN23454846	SRR17043965	25768	438246	464014	463948	11079	6787	0.001706	0.0012	6707	737
15_2		SAMN23454847	SRR17043964	158926	3179779	3338705	3337978	61758	54888	0.005523	0.001456	53087	4065
15_3		SAMN23454848	SRR17043963	196753	4425550	4622303	4621273	66208	59440	0.006364	0.001464	57217	4135
15_4		SAMN23454849	SRR17043962	200473	6157681	6358154	6356719	70723	63660	0.006189	0.001435	61000	4165
15_5		SAMN23454850	SRR17043961	194467	4074828	4269295	4268349	67352	60279	0.006302	0.001484	57992	4127
15_6		SAMN23454851	SRR17043960	217576	7860645	8078221	8076446	72315	65134	0.006455	0.001315	62490	4171
15_7		SAMN23454852	SRR17043959	194343	4390327	4584670	4583679	65522	59116	0.005371	0.001398	57020	4141
15_8		SAMN23454853	SRR17043958	200369	5050157	5250526	5249463	69182	62014	0.006593	0.001537	59526	4155
16_1	BVAL-610143	SAMN23454854	SRR17043956	118534	1879366	1997900	1997566	46609	37876	0.00337	0.001349	37048	3309
16_2		SAMN23454855	SRR17043955	119368	1803712	1923080	1922803	47839	39078	0.003433	0.001337	38218	3284
16_3		SAMN23454856	SRR17043954	104020	1547195	1651215	1650973	45078	35200	0.003718	0.001377	34431	3023
16_4		SAMN23454857	SRR17043953	106282	1678836	1785118	1784850	44487	36127	0.003826	0.001346	35325	3086
16_5		SAMN23454858	SRR17043952	104549	1468638	1573187	1572930	46701	35091	0.003473	0.001427	34299	2988
16_6		SAMN23454859	SRR17043951	162788	3342402	3505190	3504647	58616	50023	0.004223	0.001289	48735	3881
16_7		SAMN23454860	SRR17043950	140797	3029764	3170561	3170081	45401	36756	0.002946	0.001198	36025	3162
16_8		SAMN23454861	SRR17043949	50554	784114	834668	834539	24559	11976	0.002286	0.001257	11785	1153
17_1	BVAL-610144	SAMN23454862	SRR17043948	53232	613994	667226	667075	31849	23010	0.004517	0.001733	22460	2190
17_2		SAMN23454863	SRR17043947	101455	1516780	1618235	1617865	49549	41231	0.005529	0.001603	40019	3463
17_3		SAMN23454864	SRR17043945	145169	2781630	2926799	2926176	59421	52801	0.005515	0.001517	51007	4006
17_4		SAMN23454865	SRR17043944	121861	1893939	2015800	2015340	54141	46251	0.0049	0.001488	44948	3752
17_5		SAMN23454866	SRR17043943	139241	2180603	2319844	2319343	56419	49647	0.005852	0.001586	48056	3854
17_6		SAMN23454867	SRR17043942	139326	2323714	2463040	2462520	57431	50153	0.006018	0.001439	48502	3862
17_7		SAMN23454868	SRR17043941	92099	1776536	1868635	1868356	35874	22422	0.002538	0.001247	22004	2146
17_8		SAMN23454869	SRR17043940	98023	1872660	1970683	1970416	38857	24302	0.003105	0.001226	23782	2310
18_1	BVAL-610145	SAMN23454870	SRR17043939	80603	1229997	1310600	1310315	40764	34050	0.004782	0.001552	33127	3087
18_2		SAMN23454871	SRR17043938	70884	959029	1029913	1029682	37318	28435	0.004865	0.001721	27713	2636
18_3		SAMN23454872	SRR17043937	151291	3237735	3389026	3388285	59612	52906	0.004727	0.001437	51187	4008
18_4		SAMN23454873	SRR17043936	151230	3198651	3349881	3349141	59206	52526	0.005555	0.001561	50799	3911
18_5		SAMN23454874	SRR17043934	108133	1884217	1992350	1991882	50610	41912	0.005443	0.001641	40659	3537
18_6		SAMN23454875	SRR17043933	64851	897618	962469	962243	35665	26929	0.004814	0.001686	26222	2505
18_7		SAMN23454876	SRR17043932	81571	1200096	1281667	1281386	41875	32876	0.005032	0.001636	31950	2939
18_8		SAMN23454877	SRR17043931	129814	2259492	2389306	2388844	54579	46619	0.005481	0.001632	45130	3792
19_1	BVAL-610146	SAMN23454878	SRR17043930	153545	2869126	3022671	3022195	54110	45314	0.004503	0.001388	44023	3687
19_2		SAMN23454879	SRR17043929	148635	2403182	2551817	2551420	56812	42445	0.004034	0.001414	41362	3580
19_3		SAMN23454880	SRR17043928	173451	3067583	3241034	3240518	64072	51882	0.005099	0.001444	50272	3848
19_4		SAMN23454881	SRR17043927	227951	4897811	5125762	5124959	64768	56642	0.004192	0.001312	54951	4095
19_5		SAMN23454882	SRR17043926	136282	2284291	2420573	2420183	56173	43162	0.003594	0.001335	42120	3617
19_6		SAMN23454883	SRR17043925	128341	2224555	2352896	2352544	52411	40448	0.003799	0.001438	39401	3389
19_7		SAMN23454884	SRR17043923	147044	2191168	2338212	2337860	60329	46180	0.004522	0.001473	44833	3470
19_8		SAMN23454885	SRR17043922	220160	5248674	5468834	5468001	66884	59498	0.005157	0.001324	57577	4104
20_1	BVAL-610147	SAMN23454886	SRR17043921	94312	1476274	1570586	1570213	45080	37910	0.00478	0.001594	36850	3302
20_2		SAMN23454887	SRR17043920	89089	1362249	1451338	1450978	44151	37490	0.004872	0.001566	36462	3254
20_3		SAMN23454888	SRR17043919	113389	1949053	2062442	2061974	50957	44182	0.004857	0.001453	42907	3675
20_4		SAMN23454889	SRR17043918	129649	2384778	2514427	2513895	54591	46798	0.005963	0.001517	45277	3686
20_5		SAMN23454890	SRR17043917	149371	2792786	2942157	2941500	58501	51685	0.005687	0.00157	50007	3983
20_6		SAMN23454891	SRR17043916	128252	2273271	2401523	2400966	54316	46961	0.004857	0.001509	45646	3748
20_7		SAMN23454892	SRR17043915	143326	2506070	2649396	2648795	55251	48733	0.004528	0.001423	47293	3868
20_8		SAMN23454893	SRR17043914	182292	3968890	4151182	4150246	63695	57074	0.004991	0.001499	55131	4082
21_1	BVAL-610150	SAMN23454894	SRR17043912	98795	1537251	1636046	1635663	46289	38647	0.004878	0.001616	37550	3368
21_2		SAMN23454895	SRR17043911	74816	1022794	1097610	1097374	39859	31057	0.004895	0.001766	30194	2827
21_3		SAMN23454896	SRR17043910	135601	2222733	2358334	2357836	54724	47342	0.005115	0.001509	45876	3790
21_4		SAMN23454897	SRR17043909	168095	3521195	3689290	3688528	61996	55456	0.005375	0.001504	53554	4049
21_5		SAMN23454898	SRR17043908	202274	4668484	4870758	4869678	65686	58957	0.005524	0.001484	56823	4135
21_6		SAMN23454899	SRR17043907	201119	4618229	4819348	4818285	66262	58648	0.006075	0.001524	56346	4125
21_7		SAMN23454900	SRR17043906	169043	3632604	3801647	3800819	61771	55329	0.00547	0.001548	53383	4069
21_8		SAMN23454901	SRR17043905	156849	3211732	3368581	3367843	59761	52904	0.00526	0.001576	51130	4012
22_1	BVAL-610151	SAMN23454902	SRR17043904	93539	1531352	1624891	1624544	46258	39252	0.004964	0.001667	38133	3344
22_2		SAMN23454903	SRR17043903	127919	2058603	2186522	2186028	54567	46282	0.005629	0.001643	44825	3687
22_3		SAMN23454904	SRR17043901	147362	2772495	2919857	2919233	58901	51632	0.004973	0.001528	50010	3964
22_4		SAMN23454905	SRR17043900	190018	4038674	4228692	4227755	64388	57513	0.005699	0.001545	55413	4115
22_5		SAMN23454906	SRR17043899	197397	4338396	4535793	4534721	66308	59064	0.006941	0.001548	56716	4129
22_6		SAMN23454907	SRR17043898	186736	3766207	3952943	3952051	63602	56936	0.006137	0.001563	54877	4075
22_7		SAMN23454908	SRR17043897	209197	5391606	5600803	5599635	67658	60469	0.005501	0.00148	58211	4146
22_8		SAMN23454909	SRR17043896	148062	2762323	2910385	2909744	59102	51777	0.005727	0.001552	49997	3933
23_1	BVAL-610158	SAMN23454910	SRR17043895	92209	1491556	1583765	1583425	45097	38225	0.005085	0.00169	37182	3307
23_2		SAMN23454911	SRR17043894	149275	2992987	3142262	3141585	59872	52277	0.005763	0.001564	50476	3974
23_3		SAMN23454912	SRR17043893	107298	1774677	1881975	1881563	50129	42121	0.005396	0.001524	40888	3576
23_4		SAMN23454913	SRR17043892	98339	1541615	1639954	1639616	46846	38573	0.004667	0.001601	37562	3356
23_5		SAMN23454914	SRR17043890	121402	1983925	2105327	2104827	51981	44425	0.004941	0.001585	43132	3673
23_6		SAMN23454915	SRR17043889	126032	2104309	2230341	2229859	53387	45294	0.005325	0.001543	43952	3712
23_7		SAMN23454916	SRR17043888	200743	4543224	4743967	4742955	66048	58873	0.005782	0.001444	56743	4116
23_8		SAMN23454917	SRR17043887	200235	4787848	4988083	4987034	65530	58982	0.006317	0.001459	56746	4130
24_1	BVAL-610159	SAMN23454918	SRR17043886	197341	4775513	4972854	4971757	67244	60453	0.006907	0.001524	58053	4135
24_2		SAMN23454919	SRR17043885	205496	5383267	5588763	5587517	67057	60194	0.005942	0.001481	57880	4156
24_3		SAMN23454920	SRR17043884	221675	7809122	8030797	8029057	72322	64983	0.007079	0.001405	62220	4169
24_4		SAMN23454921	SRR17043883	206062	5814126	6020188	6018856	68735	61960	0.005918	0.001441	59460	4154
24_5		SAMN23454922	SRR17043882	242339	9447133	9689472	9687332	75926	66941	0.007025	0.001424	63884	4168
24_6		SAMN23454923	SRR17043881	210288	6915290	7125578	7124079	72738	64430	0.007274	0.001516	61583	4164
24_7		SAMN23454924	SRR17043879	206985	5977760	6184745	6183415	70411	62368	0.006226	0.001517	59767	4153
24_8		SAMN23454925	SRR17043878	204192	5419615	5623807	5622539	68585	61512	0.006943	0.001476	58975	4152
25_1	BVAL-610160	SAMN23454926	SRR17043877	114299	1788277	1902576	1902158	50655	43502	0.005438	0.001591	42218	3534
25_2		SAMN23454927	SRR17043876	188555	3997869	4186424	4185502	63477	56865	0.005498	0.001444	54868	4095
25_3		SAMN23454928	SRR17043875	204705	4767006	4971711	4970558	65710	58928	0.005123	0.001414	56955	4141
25_4		SAMN23454929	SRR17043874	208865	7067547	7276412	7274812	70808	62805	0.005634	0.001467	60322	4167
25_5		SAMN23454930	SRR17043873	142428	2464561	2606989	2606411	59425	50905	0.006045	0.001544	49213	3891
25_6		SAMN23454931	SRR17043872	197779	4182803	4380582	4379596	65445	57718	0.005304	0.001477	55706	4106
25_7		SAMN23454932	SRR17043871	169043	3427395	3596438	3595638	62965	55731	0.006261	0.001528	53708	4056
25_8		SAMN23454933	SRR17043870	142843	2458868	2601711	2601168	55654	48832	0.004717	0.001555	47379	3858
26_1	BVAL-610161	SAMN23454934	SRR17043867	85510	1325230	1410740	1410434	43918	35305	0.004704	0.001542	34402	3129
26_2		SAMN23454935	SRR17043866	65959	870039	935998	935800	36586	26454	0.003989	0.001585	25849	2583
26_4		SAMN23454937	SRR17043864	69614	908046	977660	977437	38719	27439	0.004598	0.00156	26753	2649
26_5		SAMN23454938	SRR17043863	163652	3246473	3410125	3409329	60742	53143	0.005423	0.001683	51312	4019
26_6		SAMN23454939	SRR17043862	172300	3688966	3861266	3860426	63011	55573	0.005762	0.001479	53709	4074
26_7		SAMN23454940	SRR17043861	157680	3329559	3487239	3486478	60039	52732	0.004783	0.001475	51099	4050
26_8		SAMN23454941	SRR17043860	173757	3831615	4005372	4004468	63301	56323	0.005908	0.001473	54302	4084
27_1	BVAL-610162	SAMN23454942	SRR17043859	70500	906300	976800	976578	37839	29074	0.00461	0.00175	28362	2684
27_2		SAMN23454943	SRR17043858	127090	2103984	2231074	2230593	54334	46165	0.004779	0.001474	44847	3716
27_3		SAMN23454944	SRR17043856	153349	3017833	3171182	3170428	60314	52748	0.005712	0.001491	51001	4019
27_4		SAMN23454945	SRR17043855	178796	3935209	4114005	4113048	63675	56568	0.0053	0.001398	54664	4098
27_5		SAMN23454946	SRR17043854	92441	1316006	1408447	1408133	46873	36911	0.005357	0.001673	35903	3204
27_6		SAMN23454947	SRR17043853	204764	4819920	5024684	5023588	66239	59035	0.004543	0.001452	57057	4135
27_7		SAMN23454948	SRR17043852	190437	4049683	4240120	4239209	63539	56754	0.005151	0.001534	54896	4124
27_8		SAMN23454949	SRR17043851	115939	1853729	1969668	1969211	50976	43235	0.004854	0.001609	42008	3574
28_1	BVAL-610172	SAMN23454950	SRR17043850	40276	409536	449812	449707	24990	15025	0.004069	0.001803	14697	1548
28_2		SAMN23454951	SRR17043849	193560	4369754	4563314	4562274	68561	60586	0.008134	0.001622	57937	4092
28_3		SAMN23454952	SRR17043848	95213	1446512	1541725	1541362	46302	38019	0.004064	0.001546	37037	3313
28_4		SAMN23454953	SRR17043847	134110	2191032	2325142	2324668	54931	47458	0.004921	0.001545	46005	3799
28_5		SAMN23454954	SRR17043845	161575	3240999	3402574	3401843	61511	54661	0.005815	0.00146	52806	4039
28_6		SAMN23454955	SRR17043844	182598	3741393	3923991	3923113	63864	57601	0.005602	0.001481	55613	4092
28_7		SAMN23454956	SRR17043843	193043	4143284	4336327	4335396	64376	57324	0.005912	0.001504	55302	4109
29_1	BVAL-610173	SAMN23454958	SRR17043841	100130	1429398	1529528	1529293	45587	34914	0.003518	0.001361	34126	2778
29_2		SAMN23454959	SRR17043840	96065	1482141	1578206	1577983	41162	32309	0.003176	0.001369	31652	2932
29_3		SAMN23454960	SRR17043839	158103	3097977	3256080	3255591	57242	48208	0.003851	0.001296	46957	3829
29_4		SAMN23454961	SRR17043838	149958	2683434	2833392	2832953	56086	44173	0.003482	0.001345	43135	3609
29_5		SAMN23454962	SRR17043837	144998	2397634	2542632	2542195	55162	44466	0.003424	0.001342	43417	3604
29_6		SAMN23454963	SRR17043836	217806	4045861	4263667	4263036	64342	55906	0.003836	0.001277	54304	3978
29_7		SAMN23454964	SRR17043834	175682	3286972	3462654	3462112	61840	50476	0.004604	0.001333	49048	3872
29_8		SAMN23454965	SRR17043833	161797	3003609	3165406	3164975	61466	51632	0.004534	0.001357	50184	3747
30_1	BVAL-610174	SAMN23454966	SRR17043832	124553	2027771	2152324	2151836	52703	44812	0.00482	0.001481	43607	3647
30_2		SAMN23454967	SRR17043831	157888	3226139	3384027	3383290	61239	54020	0.005595	0.001518	52237	4002
30_4		SAMN23454969	SRR17043829	154524	3053918	3208442	3207752	60145	52340	0.004735	0.001446	50739	3995
30_5		SAMN23454970	SRR17043828	189033	4016735	4205768	4204880	65524	58369	0.005871	0.001492	56225	4100
30_6		SAMN23454971	SRR17043827	145891	2609586	2755477	2754894	58970	51207	0.005611	0.00161	49554	3932
30_7		SAMN23454972	SRR17043826	177338	3875290	4052628	4051815	63751	56974	0.005169	0.001423	55093	4109
30_8		SAMN23454973	SRR17043825	93556	1348218	1441774	1441447	46873	36697	0.005348	0.001663	35616	3214
31_1	BVAL-610180	SAMN23454974	SRR17043823	99039	1529137	1628176	1627822	48082	40633	0.005137	0.001638	39439	3444
31_2		SAMN23454975	SRR17043822	82029	1145176	1227205	1226937	42476	33410	0.005076	0.00155	32471	2926
31_3		SAMN23454976	SRR17043821	43537	445809	489346	489244	27505	16934	0.004144	0.001751	16577	1739
31_4		SAMN23454977	SRR17043820	44159	417607	461766	461661	28236	15661	0.003922	0.001764	15341	1566
31_5		SAMN23454978	SRR17043819	41648	438449	480097	479986	25343	16637	0.004344	0.001753	16255	1676
31_6		SAMN23454979	SRR17043818	57502	683670	741172	741018	33949	23869	0.004523	0.001676	23342	2260
31_7		SAMN23454980	SRR17043817	102520	1875285	1977805	1977504	40121	24646	0.003534	0.001318	24088	2272
31_8		SAMN23454981	SRR17043816	103040	1568876	1671916	1671652	45902	23026	0.003219	0.001298	22522	2192
32_1	BVAL-610181	SAMN23454982	SRR17043815	129138	2100418	2229556	2229189	52685	41358	0.00428	0.001442	40316	3439
32_2		SAMN23454983	SRR17043814	205528	3795197	4000725	4000132	62159	54602	0.00437	0.001367	53068	3999
32_3		SAMN23454984	SRR17043812	159174	2970174	3129348	3128876	57425	47337	0.003586	0.001311	46195	3811
32_4		SAMN23454985	SRR17043811	166130	3241895	3408025	3407487	60495	50413	0.004942	0.001368	48941	3831
32_5		SAMN23454986	SRR17043810	170342	3390757	3561099	3560494	59180	50244	0.003943	0.001315	48961	3891
32_6		SAMN23454987	SRR17043809	210561	4040280	4250841	4250201	61169	52588	0.004343	0.00136	51125	3983
32_7		SAMN23454988	SRR17043808	217571	4128521	4346092	4345461	68629	57809	0.004215	0.001342	56077	4002
32_8		SAMN23454989	SRR17043807	211777	3713789	3925566	3924956	67212	58233	0.005694	0.001457	56148	3905
34_1	BVAL-610183	SAMN23454990	SRR17043806	241554	7002636	7244190	7243176	61722	52755	0.003415	0.00119	51372	3999
34_2		SAMN23454991	SRR17043805	244392	5945411	6189803	6188831	62853	50479	0.00344	0.001272	49141	3912
34_3		SAMN23454992	SRR17043804	250173	11985147	12235320	12233428	68829	59347	0.003883	0.001196	57476	4081
34_4		SAMN23454993	SRR17043803	238863	5693481	5932344	5931464	63090	53187	0.003345	0.001235	51905	3820
34_5		SAMN23454994	SRR17043801	242792	6183035	6425827	6424890	61516	51128	0.004225	0.001295	49649	3918
34_6		SAMN23454995	SRR17043800	240087	5382023	5622110	5621253	59488	49157	0.004305	0.001256	47717	3789
34_7		SAMN23454996	SRR17043799	154162	2857289	3011451	3011036	52128	37037	0.003132	0.001293	36226	3170
34_8		SAMN23454997	SRR17043798	167625	3698313	3865938	3865369	54798	41555	0.003597	0.001262	40488	3458
35_1	BVAL-610184	SAMN23454998	SRR17043797	36649	497991	534640	534524	20572	13491	0.003015	0.001368	13261	1369
35_2		SAMN23454999	SRR17043796	58289	814253	872542	872325	29940	19907	0.003053	0.001574	19508	1945
35_3		SAMN23455000	SRR17043795	76882	1252179	1329061	1328782	37957	27539	0.003974	0.00142	26873	2566
35_4		SAMN23455001	SRR17043794	68533	1070806	1139339	1139099	34261	23125	0.003594	0.001413	22606	2175
35_5		SAMN23455002	SRR17043793	96138	1664150	1760288	1759884	43685	33397	0.004406	0.001404	32535	3030
35_6		SAMN23455003	SRR17043792	72336	1220983	1293319	1293089	34830	26051	0.003882	0.001333	25478	2452
35_7		SAMN23455004	SRR17043790	121227	2178359	2299586	2299037	47303	39152	0.004736	0.001457	38038	3338
35_8		SAMN23455005	SRR17043789	128905	2441051	2569956	2569405	49353	40564	0.004705	0.001451	39414	3426
36_1	BVAL-610192	SAMN23455006	SRR17043788	43055	596022	639077	638938	23423	14424	0.003106	0.00157	14146	1490
36_3		SAMN23455008	SRR17043786	55765	892832	948597	948403	28586	20455	0.003263	0.001406	20034	1966
36_4		SAMN23455009	SRR17043785	151506	3242513	3394019	3393314	52967	45792	0.004628	0.001401	44499	3688
36_5		SAMN23455010	SRR17043784	89202	1602619	1691821	1691424	39758	30937	0.003841	0.001396	30201	2827
36_6		SAMN23455011	SRR17043783	152439	3383403	3535842	3535103	54746	47572	0.005282	0.001418	46104	3814
36_7		SAMN23455012	SRR17043782	121690	2369350	2491040	2490513	46783	38869	0.004818	0.001365	37779	3285
36_8		SAMN23455013	SRR17043781	150928	3107087	3258015	3257307	54358	46198	0.004715	0.001397	44815	3733
37_1	BVAL-610194	SAMN23455014	SRR17043779	56486	836750	893236	893035	28728	18982	0.003751	0.00157	18544	1935
37_2		SAMN23455015	SRR17043778	148209	2856476	3004685	3004023	53582	46340	0.005058	0.001498	44883	3675
37_3		SAMN23455016	SRR17043777	153463	3288583	3442046	3441316	54339	46778	0.005117	0.001445	45348	3743
37_4		SAMN23455017	SRR17043776	134015	2569598	2703613	2703041	50420	42631	0.005066	0.001469	41376	3533
37_5		SAMN23455018	SRR17043775	178179	3985236	4163415	4162466	60266	52015	0.004638	0.001431	50349	3926
37_6		SAMN23455019	SRR17043774	153790	3412034	3565824	3565037	55774	46329	0.005197	0.001551	44798	3742
37_7		SAMN23455020	SRR17043773	146773	2809695	2956468	2955833	52079	44377	0.005449	0.001431	43068	3687
37_8		SAMN23455021	SRR17043772	154334	3256614	3410948	3410192	55035	47238	0.004677	0.001482	45812	3774
38_1	BVAL-610195	SAMN23455022	SRR17043771	38268	531953	570221	570105	21425	13967	0.003125	0.001525	13701	1488
38_2		SAMN23455023	SRR17043770	149937	3113413	3263350	3262659	53706	45678	0.004261	0.001431	44377	3741
38_3		SAMN23455024	SRR17043768	197284	4837524	5034808	5033735	61831	54531	0.005021	0.001403	52726	4040
38_4		SAMN23455025	SRR17043767	138554	2736649	2875203	2874584	51003	42111	0.004991	0.001508	40831	3553
38_5		SAMN23455026	SRR17043766	208452	5343703	5552155	5550914	64480	56506	0.005959	0.001468	54404	4078
38_6		SAMN23455027	SRR17043765	152763	3104187	3256950	3256264	52727	44764	0.004357	0.001419	43481	3670
38_7		SAMN23455028	SRR17043764	139693	2642904	2782597	2781964	51450	41788	0.004627	0.001442	40573	3497
38_8		SAMN23455029	SRR17043763	110733	1983258	2093991	2093556	46459	36991	0.005202	0.00155	35867	3248
39_1	BVAL-610196	SAMN23455030	SRR17043762	46660	674379	721039	720871	24698	16947	0.003784	0.001564	16593	1683
39_2		SAMN23455031	SRR17043761	135409	2602477	2737886	2737285	51998	42662	0.00493	0.001502	41381	3573
39_3		SAMN23455032	SRR17043760	149484	3028594	3178078	3177385	53010	45590	0.004512	0.001369	44289	3732
39_4		SAMN23455033	SRR17043759	155841	3294243	3450084	3449366	54612	47162	0.005603	0.001436	45640	3764
39_5		SAMN23455034	SRR17043756	212890	5636994	5849884	5848636	63756	57340	0.005773	0.001376	55223	4089
39_6		SAMN23455035	SRR17043755	214230	5995908	6210138	6208785	64723	57639	0.00606	0.001361	55509	4103
39_7		SAMN23455036	SRR17043754	194163	4754486	4948649	4947511	61456	53252	0.004995	0.001381	51515	3967
39_8		SAMN23455037	SRR17043753	183098	4243429	4426527	4425580	59087	51793	0.005037	0.001412	50053	3939
40_1	BVAL-610197	SAMN23455038	SRR17043752	95188	1606046	1701234	1700958	38302	22430	0.002587	0.001216	22039	2153
40_2		SAMN23455039	SRR17043751	243018	5342952	5585970	5585114	60777	49011	0.003862	0.001267	47725	3840
40_3		SAMN23455040	SRR17043750	239616	7804314	8043930	8042599	66246	56140	0.004589	0.001238	54417	4072
40_4		SAMN23455041	SRR17043749	245096	5847501	6092597	6091661	61921	51418	0.003834	0.001283	50032	3935
40_5		SAMN23455042	SRR17043748	237035	7527243	7764278	7763146	66492	56632	0.004603	0.001212	54862	4056
40_6		SAMN23455043	SRR17043747	207125	4510887	4718012	4717287	55597	45348	0.003604	0.001269	44228	3695
40_7		SAMN23455044	SRR17043745	241667	5204320	5445987	5445150	60010	48671	0.003833	0.001281	47357	3820
40_8		SAMN23455045	SRR17043744	83250	1186724	1269974	1269773	38769	19954	0.002416	0.001314	19611	1856
41_1	BVAL-610198	SAMN23455046	SRR17043743	45991	623374	669365	669232	26405	14949	0.003506	0.001555	14631	1511
41_2		SAMN23455047	SRR17043742	69302	1008193	1077495	1077264	35669	23311	0.003793	0.0015	22768	2206
41_3		SAMN23455048	SRR17043741	161572	3762613	3924185	3923381	56790	48536	0.004946	0.001374	47004	3805
41_4		SAMN23455049	SRR17043740	151122	3163653	3314775	3314014	54271	44998	0.005178	0.001469	43593	3618
41_5		SAMN23455050	SRR17043739	161345	3737471	3898816	3897989	57373	47942	0.005288	0.001486	46314	3778
41_6		SAMN23455051	SRR17043738	210521	5765622	5976143	5974898	64460	56414	0.005228	0.001449	54457	4083
41_7		SAMN23455052	SRR17043737	195586	4818576	5014162	5013068	61644	53239	0.005647	0.001477	51299	4009
41_8		SAMN23455053	SRR17043736	110989	2112949	2223938	2223424	45948	37001	0.004475	0.001473	36012	3253
42_1	BVAL-610199	SAMN23455054	SRR17043734	70550	1154347	1224897	1224659	33924	25055	0.00399	0.001403	24483	2425
42_2		SAMN23455055	SRR17043733	151694	3161035	3312729	3312021	53836	44457	0.004939	0.001437	43080	3677
42_3		SAMN23455056	SRR17043732	183377	4214752	4398129	4397181	60566	52781	0.005352	0.001465	51013	3979
42_4		SAMN23455057	SRR17043731	185890	4459707	4645597	4644573	61309	52450	0.005914	0.001533	50596	3960
42_5		SAMN23455058	SRR17043730	211598	6767660	6979258	6977782	67803	59654	0.005927	0.001358	57376	4119
42_6		SAMN23455059	SRR17043729	214394	5954425	6168819	6167455	66736	58335	0.005629	0.001437	56162	4087
42_7		SAMN23455060	SRR17043728	218058	6393785	6611843	6610343	65693	58520	0.005293	0.001357	56472	4118
42_8		SAMN23455061	SRR17043727	161793	3745847	3907640	3906797	56982	49798	0.005769	0.001484	48087	3865
43_1	BVAL-610200	SAMN23455062	SRR17043726	92143	1653917	1746060	1745690	41982	32915	0.004782	0.001433	32011	2984
43_2		SAMN23455063	SRR17043725	153091	3263008	3416099	3415355	54657	46842	0.005722	0.001539	45263	3729
43_3		SAMN23455064	SRR17043723	105027	1956965	2061992	2061576	43794	36541	0.004541	0.001428	35504	3252
43_4		SAMN23455065	SRR17043722	212859	5097805	5310664	5309549	63715	56742	0.005091	0.001377	54827	4074
43_5		SAMN23455066	SRR17043721	211569	5482683	5694252	5693020	64648	56350	0.006275	0.001456	54201	4052
43_6		SAMN23455067	SRR17043720	153285	3332086	3485371	3484590	56487	47673	0.005268	0.001429	46093	3785
43_7		SAMN23455068	SRR17043719	210980	5178295	5389275	5388119	64023	56218	0.005744	0.001382	54178	4066
43_8		SAMN23455069	SRR17043718	136611	2824619	2961230	2960584	51476	42863	0.005466	0.001446	41544	3490
44_1	BVAL-610204	SAMN23455070	SRR17043717	99871	1884576	1984447	1984023	42350	34082	0.004345	0.001523	33166	3121
44_2		SAMN23455071	SRR17043716	181363	4567886	4749249	4748208	59860	52242	0.005081	0.001337	50578	3973
44_3		SAMN23455072	SRR17043715	208190	5136813	5345003	5343861	62587	55107	0.004953	0.001395	53284	4045
44_4		SAMN23455073	SRR17043714	142693	2872243	3014936	3014283	53215	43640	0.004822	0.001378	42294	3569
44_5		SAMN23455074	SRR17043712	116549	2108458	2225007	2224503	48512	38729	0.004475	0.001426	37646	3257
44_6		SAMN23455075	SRR17043711	205992	4801489	5007481	5006416	62852	54585	0.005074	0.001383	52780	4023
44_7		SAMN23455076	SRR17043710	216667	7637025	7853692	7852007	67978	60565	0.005469	0.001335	58360	4130
44_8		SAMN23455077	SRR17043709	145627	2740222	2885849	2885207	50938	43519	0.004578	0.001445	42209	3573
45_1	BVAL-610215	SAMN23455078	SRR17043708	121182	1852221	1973403	1973098	49133	39180	0.003622	0.00131	38276	3263
45_2		SAMN23455079	SRR17043707	127412	1897484	2024896	2024594	54669	41208	0.004056	0.001373	40137	3292
45_3		SAMN23455080	SRR17043706	162811	3037339	3200150	3199639	60416	50487	0.00423	0.001334	49067	3797
45_4		SAMN23455081	SRR17043705	182359	3480121	3662480	3661932	61178	51258	0.004028	0.00133	49856	3871
45_5		SAMN23455082	SRR17043704	196519	3517210	3713729	3713170	62397	52811	0.00466	0.001318	51284	3907
45_6		SAMN23455083	SRR17043703	148501	2589360	2737861	2737475	55347	44954	0.004314	0.001386	43753	3613
45_7		SAMN23455084	SRR17043701	182922	3435366	3618288	3617716	61302	52618	0.00397	0.001346	51195	3877
45_8		SAMN23455085	SRR17043700	162404	2899138	3061542	3061087	62265	49996	0.004323	0.001367	48640	3780
46_1	BVAL-610216	SAMN23455086	SRR17043699	63467	977714	1041181	1040959	31767	21909	0.003569	0.001436	21439	2184
46_2		SAMN23455087	SRR17043698	189184	4590442	4779626	4778593	61435	53087	0.006015	0.001533	51215	3968
46_3		SAMN23455088	SRR17043697	172494	4170790	4343284	4342331	57247	50361	0.005052	0.001406	48757	3910
46_4		SAMN23455089	SRR17043696	175543	3993056	4168599	4167698	58376	51599	0.004669	0.001387	50009	3954
46_5		SAMN23455090	SRR17043695	215070	6276634	6491704	6490321	64870	58043	0.00528	0.001313	55958	4129
46_6		SAMN23455091	SRR17043694	211115	5347446	5558561	5557386	62708	56049	0.005488	0.001412	54123	4062
46_7		SAMN23455092	SRR17043693	211992	5307160	5519152	5517971	62703	54753	0.004461	0.001385	52967	4059
46_8		SAMN23455093	SRR17043692	200479	4744755	4945234	4944068	62518	55365	0.006004	0.001413	53339	4023
47_1	BVAL-610218	SAMN23455094	SRR17043690	59323	807084	866407	866215	32202	19333	0.003633	0.001481	18906	1903
47_2		SAMN23455095	SRR17043689	153064	3297146	3450210	3449468	55632	46691	0.005321	0.001425	45227	3782
47_3		SAMN23455096	SRR17043688	156635	3470658	3627293	3626471	55435	48101	0.005205	0.001558	46549	3836
47_4		SAMN23455097	SRR17043687	219079	5803289	6022368	6020991	64989	57073	0.00521	0.001431	55112	4095
47_5		SAMN23455098	SRR17043686	146999	2860957	3007956	3007311	53914	44356	0.005138	0.001472	42918	3617
47_6		SAMN23455099	SRR17043685	149727	3017868	3167595	3166883	54592	45708	0.00462	0.001369	44307	3692
47_7		SAMN23455100	SRR17043983	132522	2618403	2750925	2750389	51589	42049	0.004926	0.001474	40784	3498
47_8		SAMN23455101	SRR17044279	125258	2163365	2288623	2288103	49307	39752	0.004712	0.001546	38551	3367
48_1	BVAL-610248	SAMN23455102	SRR17044278	96641	1738526	1835167	1834742	42311	34954	0.004476	0.001453	34032	3069
48_2		SAMN23455103	SRR17044277	129614	2316791	2446405	2445859	49524	41783	0.004393	0.001382	40604	3495
48_3		SAMN23455104	SRR17044275	96747	1816745	1913492	1913091	43046	34324	0.004166	0.001409	33441	3075
48_4		SAMN23455105	SRR17044274	208778	5028933	5237711	5236544	63643	56650	0.005578	0.001365	54586	4057
48_5		SAMN23455106	SRR17044273	100010	1728156	1828166	1827785	43330	35751	0.00449	0.001471	34744	3125
48_6		SAMN23455107	SRR17044272	159925	3680100	3840025	3839142	57543	50843	0.00457	0.001333	49269	3904
48_7		SAMN23455108	SRR17044271	106382	2198697	2305079	2304702	38944	27041	0.003515	0.001277	26424	2416
48_8		SAMN23455109	SRR17044270	122665	2491247	2613912	2613477	44672	29830	0.003456	0.001244	29165	2681
49_1	BVAL-610249	SAMN23455110	SRR17044269	76061	1492776	1568837	1568518	30649	24470	0.003137	0.001294	23976	2426
49_2		SAMN23455111	SRR17044268	175236	4141539	4316775	4315792	50958	43553	0.004242	0.001397	42262	3691
49_3		SAMN23455112	SRR17044267	157043	3730829	3887872	3887056	49437	40841	0.00443	0.001326	39625	3521
49_4		SAMN23455113	SRR17044266	148086	3122546	3270632	3269896	45724	37144	0.003491	0.00133	36210	3387
49_5		SAMN23455114	SRR17044264	198781	4975987	5174768	5173706	56325	48119	0.005	0.001341	46548	3845
49_6		SAMN23455115	SRR17044263	190972	4890907	5081879	5080785	54103	47433	0.004612	0.001324	46009	3852
49_7		SAMN23455116	SRR17044262	128437	2591238	2719675	2719050	42821	34138	0.003849	0.001349	33235	3215
49_8		SAMN23455117	SRR17044261	174218	4401476	4575694	4574713	53655	45126	0.004478	0.001377	43739	3784
50_1	BVAL-610250	SAMN23455118	SRR17044260	120630	1907458	2028088	2027757	47908	37427	0.003894	0.00135	36524	3262
50_2		SAMN23455119	SRR17044259	127224	1771974	1899198	1898919	59039	40208	0.003972	0.00149	39129	3218
50_3		SAMN23455120	SRR17044258	126421	1986053	2112474	2112184	53679	39054	0.004292	0.001392	38084	3320
50_4		SAMN23455121	SRR17044257	100022	1384600	1484622	1484381	50635	26953	0.004386	0.001562	26218	2540
50_5		SAMN23455122	SRR17044256	158476	2811475	2969951	2969453	60122	47948	0.004252	0.001329	46651	3780
50_6		SAMN23455123	SRR17044255	158738	2828846	2987584	2987126	60476	47221	0.004043	0.00138	45902	3761
50_7		SAMN23455124	SRR17044253	153342	2518563	2671905	2671499	56564	46077	0.003846	0.001373	44903	3676
50_8		SAMN23455125	SRR17044252	129532	1971761	2101293	2100963	55793	41670	0.004163	0.001419	40607	3366
51_1	BVAL-610251	SAMN23455126	SRR17044251	161520	3688964	3850484	3849646	47873	41227	0.00456	0.001402	39984	3546
51_2		SAMN23455127	SRR17044250	81969	1705578	1787547	1787163	31697	25515	0.003677	0.001332	24914	2601
51_3		SAMN23455128	SRR17044249	80190	1638394	1718584	1718205	32344	24746	0.003532	0.001328	24164	2476
51_4		SAMN23455129	SRR17044248	100033	2033055	2133088	2132612	38664	28180	0.003747	0.001352	27483	2740
51_5		SAMN23455130	SRR17044247	98854	1994149	2093003	2092550	37625	28475	0.004337	0.001435	27740	2828
51_6		SAMN23455131	SRR17044246	154244	3231144	3385388	3384643	47363	38471	0.00413	0.001363	37366	3432
51_7		SAMN23455132	SRR17044245	137639	2887046	3024685	3024059	44077	35917	0.003979	0.001356	34924	3285
51_8		SAMN23455133	SRR17044244	164009	3964048	4128057	4127235	51529	42326	0.004687	0.001361	41040	3589
52_1	BVAL-610252	SAMN23455134	SRR17044241	161815	3745719	3907534	3906721	48298	40303	0.004211	0.00137	39092	3565
52_2		SAMN23455135	SRR17044240	122233	2539667	2661900	2661330	41985	33554	0.003758	0.00137	32686	3165
52_3		SAMN23455136	SRR17044239	223276	6216608	6439884	6438509	58000	50109	0.004049	0.001303	48624	3937
52_4		SAMN23455137	SRR17044238	155906	3484261	3640167	3639419	48131	39405	0.00489	0.00136	38193	3476
52_5		SAMN23455138	SRR17044237	228992	7547101	7776093	7774337	64346	54696	0.005874	0.001369	52690	4017
52_6		SAMN23455139	SRR17044236	234029	7926701	8160730	8158934	64050	54592	0.00533	0.001356	52670	4063
52_7		SAMN23455140	SRR17044235	164787	3914621	4079408	4078561	51841	43636	0.004686	0.001344	42284	3690
52_8		SAMN23455141	SRR17044234	155246	3019858	3175104	3174429	47474	38453	0.00422	0.001414	37359	3415
53_1	BVAL-610258	SAMN23455142	SRR17044233	113970	1528498	1642468	1642240	51541	34681	0.003961	0.001484	33842	2961
53_2		SAMN23455143	SRR17044232	126469	2002763	2129232	2128911	52225	40598	0.003697	0.001339	39641	3341
53_3		SAMN23455144	SRR17044230	156711	3024371	3181082	3180591	58862	47069	0.004906	0.001475	45643	3677
53_4		SAMN23455145	SRR17044229	154037	2723195	2877232	2876765	57915	46738	0.003901	0.001348	45524	3759
53_5		SAMN23455146	SRR17044228	129516	2107633	2237149	2236818	55846	41796	0.003643	0.001307	40829	3469
53_6		SAMN23455147	SRR17044227	137473	2299057	2436530	2436188	53173	43847	0.00377	0.00134	42775	3567
53_7		SAMN23455148	SRR17044226	202904	3706182	3909086	3908504	62635	51651	0.005079	0.001388	50068	3937
53_8		SAMN23455149	SRR17044225	158494	3022318	3180812	3180346	56219	47923	0.004405	0.001403	46529	3761
54_1	BVAL-610259	SAMN23455150	SRR17044224	66827	1180496	1247323	1247142	26577	18276	0.002166	0.0012	18022	1845
54_2		SAMN23455151	SRR17044223	238877	6270869	6509746	6508755	62516	53155	0.004224	0.00124	51615	3943
54_3		SAMN23455152	SRR17044222	130173	2432270	2562443	2562054	44699	33001	0.002947	0.00124	32347	2951
54_4		SAMN23455153	SRR17044221	173411	3956507	4129918	4129279	53376	41998	0.003238	0.001267	40988	3534
54_5		SAMN23455154	SRR17044219	199245	4153732	4352977	4352313	58342	45287	0.004137	0.001291	44077	3669
54_6		SAMN23455155	SRR17044218	162752	3087811	3250563	3250032	51981	39957	0.003141	0.001271	39066	3149
54_7		SAMN23455156	SRR17044217	204049	4400406	4604455	4603739	57321	44388	0.00327	0.001293	43311	3646
54_8		SAMN23455157	SRR17044216	121131	2096699	2217830	2217459	42012	29631	0.002784	0.001324	29046	2665
55_1	BVAL-610260	SAMN23455158	SRR17044215	87084	1824777	1911861	1911460	34218	27587	0.00377	0.001306	26931	2745
55_2		SAMN23455159	SRR17044214	211780	5513277	5725057	5723884	57297	49065	0.004566	0.001336	47599	3937
55_3		SAMN23455160	SRR17044213	204541	5273904	5478445	5477318	57924	49322	0.004923	0.001333	47713	3926
55_4		SAMN23455161	SRR17044212	208033	5487484	5695517	5694303	57376	48608	0.004905	0.001359	47039	3889
55_5		SAMN23455162	SRR17044211	199281	4913148	5112429	5111296	57540	47872	0.004835	0.001372	46349	3902
55_6		SAMN23455163	SRR17044210	218833	5319924	5538757	5537555	57283	49062	0.004821	0.001378	47504	3906
55_7		SAMN23455164	SRR17044208	155473	3288684	3444157	3443415	48004	37258	0.003854	0.001355	36254	3381
55_8		SAMN23455165	SRR17044207	224032	5861303	6085335	6083980	59517	51133	0.004416	0.001367	49485	3975
56_1	BVAL-610261	SAMN23455166	SRR17044206	114828	2525681	2640509	2639949	39593	33034	0.003659	0.00132	32210	3103
56_2		SAMN23455167	SRR17044205	219154	5766040	5985194	5983898	59653	50616	0.004948	0.001284	48873	3978
56_3		SAMN23455168	SRR17044204	200681	5307436	5508117	5506890	56701	49074	0.004698	0.001245	47492	3869
56_4		SAMN23455169	SRR17044203	218575	5497691	5716266	5715037	57150	49861	0.004972	0.001319	48220	3913
56_5		SAMN23455170	SRR17044202	190729	4688895	4879624	4878552	55069	47227	0.004273	0.0013	45847	3838
56_6		SAMN23455171	SRR17044201	192458	4776309	4968767	4967630	55829	46948	0.004849	0.001401	45404	3835
56_7		SAMN23455172	SRR17044200	238387	7243600	7481987	7480375	64015	54750	0.005569	0.001343	52878	4001
56_8		SAMN23455173	SRR17044199	180477	4260079	4440556	4439609	53330	44746	0.00454	0.001331	43437	3744
57_1	BVAL-610274	SAMN23455174	SRR17044197	179909	4735400	4915309	4914271	53905	46231	0.004519	0.001283	44857	3849
57_2		SAMN23455175	SRR17044196	231917	6991828	7223745	7222178	61956	53471	0.005204	0.001364	51606	4040
57_3		SAMN23455176	SRR17044195	182715	4607510	4790225	4789247	54339	45117	0.003935	0.001298	43852	3810
57_4		SAMN23455177	SRR17044194	215830	5631780	5847610	5846261	57857	48969	0.004064	0.001302	47479	3935
57_5		SAMN23455178	SRR17044193	193531	4507183	4700714	4699706	57453	47127	0.00405	0.001353	45739	3834
57_6		SAMN23455179	SRR17044192	213653	5495730	5709383	5708168	59525	49562	0.004924	0.00136	47875	3895
57_7		SAMN23455180	SRR17044191	234366	7585855	7820221	7818515	65749	55255	0.005938	0.001417	53117	4073
57_8		SAMN23455181	SRR17044190	157199	3366500	3523699	3522905	48436	39235	0.004286	0.001396	38093	3456
58_1	BVAL-610285	SAMN23455182	SRR17044189	173422	4539363	4712785	4711765	50978	44055	0.003795	0.001278	42886	3720
58_2		SAMN23455183	SRR17044188	237304	6706758	6944062	6942579	60851	52171	0.004128	0.001288	50595	4013
58_3		SAMN23455184	SRR17044186	218459	5657771	5876230	5874911	58923	50112	0.00492	0.001338	48561	3933
58_4		SAMN23455185	SRR17044185	226295	5865025	6091320	6090080	60336	50644	0.004213	0.001324	49088	4001
58_5		SAMN23455186	SRR17044184	224628	6104820	6329448	6328024	60830	50518	0.004306	0.001011	48968	3861
58_6		SAMN23455187	SRR17044183	238357	6701279	6939636	6938174	64066	53676	0.004473	0.001356	51941	4036
58_7		SAMN23455188	SRR17044182	205265	5095628	5300893	5299749	58241	49324	0.004866	0.001337	47758	3902
58_8		SAMN23455189	SRR17044181	154944	3427613	3582557	3581792	46927	38714	0.004381	0.001411	37626	3420
59_1	BVAL-610301	SAMN23455190	SRR17044180	96536	1707295	1803831	1803592	37223	25360	0.00264	0.00123	24898	2306
59_2		SAMN23455191	SRR17044179	164236	3330046	3494282	3493743	51307	39932	0.003191	0.001296	39019	3270
59_3		SAMN23455192	SRR17044178	143050	2897554	3040604	3040126	48040	38089	0.003031	0.001228	37328	3191
59_4		SAMN23455193	SRR17044177	132378	2696216	2828594	2828167	44575	33989	0.003177	0.00123	33307	3017
59_5		SAMN23455194	SRR17044175	174350	3950501	4124851	4124259	53579	44365	0.003179	0.001241	43318	3496
59_6		SAMN23455195	SRR17044174	120901	2041709	2162610	2162296	44612	29521	0.00295	0.001243	28877	2654
59_7		SAMN23455196	SRR17044173	138852	2601669	2740521	2740113	50297	37109	0.00368	0.001304	36153	2965
59_8		SAMN23455197	SRR17044172	152718	3049736	3202454	3201953	48965	37453	0.003105	0.001287	36643	3278
60_1	BVAL-610302	SAMN23455198	SRR17044171	187245	3930827	4118072	4117404	54647	44287	0.003798	0.001314	43140	3558
60_2		SAMN23455199	SRR17044170	187471	4090408	4277879	4277257	55378	45616	0.003642	0.001287	44471	3578
60_3		SAMN23455200	SRR17044169	174061	3782682	3956743	3956108	55329	43454	0.003403	0.001227	42463	3491
60_4		SAMN23455201	SRR17044168	232518	4640857	4873375	4872677	62011	50763	0.004106	0.001251	49376	3676
60_5		SAMN23455202	SRR17044167	242880	6318347	6561227	6560215	62406	53677	0.003475	0.001219	52255	3969
60_6		SAMN23455203	SRR17044166	244246	6955326	7199572	7198472	61320	52254	0.003986	0.001242	50787	3952
60_7		SAMN23455204	SRR17044164	241642	10879817	11121459	11119762	72683	62088	0.005389	0.001198	59946	4139
60_8		SAMN23455205	SRR17044163	137809	2618569	2756378	2755937	49316	36457	0.003454	0.001304	35632	2948
61_1	BVAL-610303	SAMN23455206	SRR17044162	221850	6713763	6935613	6934109	60334	52722	0.005732	0.001285	50913	3997
61_2		SAMN23455207	SRR17044161	233246	6615113	6848359	6846917	61071	52638	0.005508	0.001375	50818	4024
61_3		SAMN23455208	SRR17044160	222338	6000159	6222497	6221097	57079	50038	0.00487	0.001312	48373	3834
61_4		SAMN23455209	SRR17044159	222397	5952288	6174685	6173342	60414	52546	0.005314	0.001327	50787	3978
61_5		SAMN23455210	SRR17044158	237249	7257341	7494590	7492973	64241	54505	0.005499	0.001377	52600	3976
61_6		SAMN23455211	SRR17044157	228128	6227391	6455519	6454081	61341	50942	0.005167	0.00138	49124	3825
61_7		SAMN23455212	SRR17044156	183853	4555553	4739406	4738394	55265	45766	0.004707	0.001368	44308	3750
61_8		SAMN23455213	SRR17044155	204806	5371297	5576103	5574910	58444	49626	0.004884	0.001344	47996	3907
62_1	BVAL-610329	SAMN23455214	SRR17044153	180645	4454526	4635171	4634242	52740	44702	0.004482	0.001393	43332	3788
62_2		SAMN23455215	SRR17044152	226162	6416216	6642378	6640834	61182	52622	0.004804	0.001276	50915	4005
62_3		SAMN23455216	SRR17044151	234330	6644215	6878545	6877040	61811	52912	0.00406	0.001293	51274	3967
62_4		SAMN23455217	SRR17044150	209755	5412705	5622460	5621261	58808	49671	0.004625	0.001277	48167	3961
62_5		SAMN23455218	SRR17044149	213830	5601923	5815753	5814461	58053	49334	0.004711	0.001274	47798	3763
62_6		SAMN23455219	SRR17044148	229200	6369638	6598838	6597436	61760	51885	0.004225	0.001321	50336	4011
62_7		SAMN23455220	SRR17044147	219530	5845162	6064692	6063357	58654	49025	0.00423	0.001317	47580	3911
62_8		SAMN23455221	SRR17044146	224558	6138345	6362903	6361477	59970	51580	0.005801	0.001396	49744	3989
63_1	BVAL-610334	SAMN23455222	SRR17044145	129335	2366285	2495620	2495234	41712	32962	0.002889	0.001259	32316	2923
63_2		SAMN23455223	SRR17044144	147710	2955206	3102916	3102420	47131	38995	0.003989	0.001267	37976	3121
63_3		SAMN23455224	SRR17044142	121966	2061726	2183692	2183377	45435	30503	0.003208	0.001286	29857	2649
63_4		SAMN23455225	SRR17044141	180621	3888653	4069274	4068671	56076	43621	0.003525	0.001282	42558	3501
63_5		SAMN23455226	SRR17044140	168297	3934692	4102989	4102351	51919	40761	0.003396	0.001305	39793	3424
63_6		SAMN23455227	SRR17044139	128253	2102724	2230977	2230655	47773	31555	0.003139	0.001261	30860	2633
63_7		SAMN23455228	SRR17044138	122485	1858477	1980962	1980636	50825	29410	0.002813	0.001267	28889	2460
63_8		SAMN23455229	SRR17044137	134744	2586861	2721605	2721195	49310	35770	0.003586	0.001276	34964	2971
64_1	BVAL-610342	SAMN23455230	SRR17044136	229681	6532623	6762304	6760857	61799	54201	0.005745	0.001348	52274	4040
64_2		SAMN23455231	SRR17044135	204651	5125335	5329986	5328779	58164	48426	0.004736	0.001343	46895	3879
64_3		SAMN23455232	SRR17044134	184411	4397540	4581951	4580944	53462	46015	0.004602	0.001371	44665	3801
64_4		SAMN23455233	SRR17044133	202668	5035042	5237710	5236540	56668	49100	0.004934	0.001207	47596	3841
64_7		SAMN23455236	SRR17044128	230885	5989699	6220584	6219205	61357	51487	0.004575	0.001361	49798	4000
64_8		SAMN23455237	SRR17044127	201149	5137184	5338333	5337163	57161	48789	0.004582	0.001287	47307	3878
65_1	BVAL-610345	SAMN23455238	SRR17044126	232251	6473560	6705811	6704344	60125	52519	0.00434	0.001306	50920	4000
65_2		SAMN23455239	SRR17044125	234226	7297542	7531768	7530196	62516	54086	0.004465	0.001263	52394	4073
65_3		SAMN23455240	SRR17044124	157161	3503947	3661108	3660246	48673	40033	0.00435	0.001398	38950	3529
65_4		SAMN23455241	SRR17044123	225432	6115341	6340773	6339448	61118	51823	0.005109	0.001303	50075	4001
65_5		SAMN23455242	SRR17044122	227408	6361241	6588649	6587249	60814	51597	0.004964	0.001315	49937	3997
65_6		SAMN23455243	SRR17044121	208488	5570947	5779435	5778252	58243	49429	0.004333	0.001233	47983	3933
65_7		SAMN23455244	SRR17044119	232378	6648443	6880821	6879393	62721	54037	0.004355	0.001219	52355	4057
65_8		SAMN23455245	SRR17044118	225101	5854773	6079874	6078534	59010	50264	0.004474	0.001372	48675	3979
66_1	BVAL-610347	SAMN23455246	SRR17044117	93064	1465183	1558247	1558033	39526	32460	0.003267	0.001313	31825	2957
66_2		SAMN23455247	SRR17044116	222777	4486926	4709703	4709004	63705	55426	0.004269	0.0013	53842	4025
66_3		SAMN23455248	SRR17044115	133434	2303824	2437258	2436899	53536	43978	0.003823	0.001066	42906	3570
66_4		SAMN23455249	SRR17044114	130086	2200604	2330690	2330320	53127	41230	0.003601	0.001359	40255	3503
66_5		SAMN23455250	SRR17044113	187112	3486265	3673377	3672829	63251	52565	0.004325	0.001368	51071	3907
66_6		SAMN23455251	SRR17044112	149112	2449918	2599030	2598590	55774	45437	0.003836	0.001373	44285	3539
66_7		SAMN23455252	SRR17044111	222415	4646557	4868972	4868194	64218	55477	0.004616	0.001348	53811	4067
66_8		SAMN23455253	SRR17044110	126067	1912698	2038765	2038461	52247	41119	0.003891	0.001416	40082	3239
67_1	BVAL-610348	SAMN23455254	SRR17044108	239431	5839743	6079174	6078223	62788	52390	0.004671	0.001334	50869	3878
67_2		SAMN23455255	SRR17044107	234503	6273961	6508464	6507477	62184	54037	0.004237	0.001223	52646	3914
67_3		SAMN23455256	SRR17044106	234501	7944316	8178817	8177606	67670	58304	0.004401	0.001243	56526	4053
67_4		SAMN23455257	SRR17044105	161884	3404279	3566163	3565607	53799	40884	0.003837	0.001273	39846	3383
67_5		SAMN23455258	SRR17044104	239087	6482276	6721363	6720314	64993	55124	0.003353	0.001219	53788	3960
67_6		SAMN23455259	SRR17044103	122442	2123850	2246292	2245946	42388	30055	0.003004	0.001257	29497	2740
67_7		SAMN23455260	SRR17044102	237316	9224892	9462208	9460735	66467	56895	0.004203	0.001223	55306	4095
67_8		SAMN23455261	SRR17044101	117482	2031351	2148833	2148519	42152	29505	0.002842	0.001306	28928	2526
68_1	BVAL-610349	SAMN23455262	SRR17044100	176673	4367581	4544254	4543270	52668	45693	0.004518	0.001322	44420	3793
68_2		SAMN23455263	SRR17044099	226788	6156652	6383440	6382032	59268	52214	0.005071	0.001279	50637	4010
68_3		SAMN23455264	SRR17044097	224790	6760827	6985617	6984094	58322	51261	0.004131	0.001265	49700	3976
68_4		SAMN23455265	SRR17044096	231145	6518643	6749788	6748341	61606	53456	0.005101	0.001298	51736	4028
68_5		SAMN23455266	SRR17044095	155053	3229950	3385003	3384252	46460	39241	0.004457	0.001407	38099	3409
68_6		SAMN23455267	SRR17044094	179911	4878723	5058634	5057515	55130	46794	0.005242	0.001126	45277	3765
68_7		SAMN23455268	SRR17044093	107638	2349214	2456852	2456479	38067	28071	0.003411	0.001244	27461	2472
68_8		SAMN23455269	SRR17044092	128512	2848747	2977259	2976799	43164	31425	0.00393	0.001306	30624	2769
69_1	BVAL-610350	SAMN23455270	SRR17044091	154226	3234825	3389051	3388533	53779	46587	0.004076	0.001308	45339	3692
69_2		SAMN23455271	SRR17044090	65990	811088	877078	876931	35827	18146	0.002946	0.001493	17783	1812
69_3		SAMN23455272	SRR17044089	47757	533530	581287	581189	28532	12795	0.003183	0.001452	12557	1265
69_4		SAMN23455273	SRR17044088	60963	793130	854093	853949	32859	17637	0.002414	0.001407	17363	1798
69_5		SAMN23455274	SRR17044086	55910	659508	715418	715317	31812	15660	0.003234	0.001507	15355	1520
69_6		SAMN23455275	SRR17044085	159906	3433439	3593345	3592802	57534	48806	0.004817	0.001398	47367	3735
69_7		SAMN23455276	SRR17044084	104155	1710433	1814588	1814295	45406	32326	0.004117	0.001405	31527	2807
69_8		SAMN23455277	SRR17044083	82485	1204356	1286841	1286625	40131	25165	0.004019	0.00148	24529	2325
70_1	Hammond's Dwarf Scarlet	SAMN23455278	SRR17044082	70774	1104856	1175630	1175429	33360	22485	0.003771	0.001492	21972	2075
70_2		SAMN23455279	SRR17044081	48740	652927	701667	701561	26187	15026	0.002924	0.001437	14769	1550
70_3		SAMN23455280	SRR17044080	119722	2124574	2244296	2243929	48675	36543	0.004914	0.00152	35509	3046
70_4		SAMN23455281	SRR17044079	218910	5102772	5321682	5320857	62747	54315	0.005488	0.001408	52474	3926
70_5		SAMN23455282	SRR17044078	170245	3806083	3976328	3975699	58652	49236	0.005255	0.0015	47472	3728
70_6		SAMN23455283	SRR17044077	126215	2213148	2339363	2338992	50696	38053	0.004254	0.001405	37005	3233
70_7		SAMN23455284	SRR17044075	217321	5026208	5243529	5242693	63807	54917	0.00549	0.001427	53014	3973
70_8		SAMN23455285	SRR17044074	77089	1093605	1170694	1170515	39194	22743	0.003868	0.00146	22213	2082
71_1	BVAL-610386	SAMN23455286	SRR17044073	164953	3748380	3913333	3912707	56833	48145	0.004789	0.001462	46665	3757
71_2		SAMN23455287	SRR17044072	107798	1900022	2007820	2007521	46187	34098	0.004285	0.001427	33148	2996
71_3		SAMN23455288	SRR17044071	215233	6574063	6789296	6788245	65967	58948	0.005287	0.001337	56875	4083
71_4		SAMN23455289	SRR17044070	214508	4715899	4930407	4929648	62492	53935	0.005339	0.00135	52036	3946
71_5		SAMN23455290	SRR17044069	128349	2617558	2745907	2745440	51874	40324	0.004429	0.001434	39236	3336
71_6		SAMN23455291	SRR17044068	152776	3249939	3402715	3402194	54785	43938	0.004285	0.001394	42652	3538
71_7		SAMN23455292	SRR17044067	126835	2442751	2569586	2569208	53178	36826	0.004243	0.001471	35844	3216
71_8		SAMN23455293	SRR17044066	89988	1501326	1591314	1591049	41131	27234	0.003702	0.001418	26617	2490
72_1	BVAL-610387	SAMN23455294	SRR17044064	62562	1021006	1083568	1083400	29519	21430	0.003366	0.001401	20979	1981
72_2		SAMN23455295	SRR17044063	157295	3650306	3807601	3807004	56829	46602	0.00454	0.001423	45232	3688
72_3		SAMN23455296	SRR17044062	93689	1572195	1665884	1665626	42291	29978	0.003696	0.001355	29282	2680
72_4		SAMN23455297	SRR17044061	153160	3426508	3579668	3579094	56008	45810	0.004934	0.001472	44415	3629
72_5		SAMN23455298	SRR17044060	214994	4980492	5195486	5194688	63247	53583	0.005276	0.00144	51745	3931
72_6		SAMN23455299	SRR17044059	166687	3850150	4016837	4016206	56429	47851	0.005138	0.001418	46335	3718
72_7		SAMN23455300	SRR17044058	220271	5077546	5297817	5297005	62422	53194	0.004521	0.00141	51530	3926
72_8		SAMN23455301	SRR17044057	105272	1964303	2069575	2069226	44194	32764	0.003935	0.001473	31926	2829
73_1	BVAL-610388	SAMN23455302	SRR17044056	82073	1347545	1429618	1429430	32692	21556	0.002632	0.001278	21166	2071
73_2		SAMN23455303	SRR17044055	239036	6286976	6526012	6525014	61538	52935	0.00455	0.001313	51363	3969
73_3		SAMN23455304	SRR17044053	93527	1531505	1625032	1624771	36394	24613	0.002832	0.001263	24152	2211
73_4		SAMN23455305	SRR17044052	243023	6170483	6413506	6412508	60183	52198	0.00336	0.001215	50835	3954
73_5		SAMN23455306	SRR17044051	226736	8971604	9198340	9196943	71668	62424	0.003989	0.001204	60596	4112
73_6		SAMN23455307	SRR17044050	236707	8291003	8527710	8526383	66768	58591	0.004075	0.001228	56888	4093
73_7		SAMN23455308	SRR17044049	267443	12249490	12516933	12515055	70331	62209	0.004595	0.001201	60121	4122
73_8		SAMN23455309	SRR17044048	148697	2894389	3043086	3042640	50590	36502	0.003011	0.001265	35756	3226
74_1	BVAL-610468	SAMN23455310	SRR17044047	109871	2149970	2259841	2259504	45000	34503	0.004413	0.001494	33583	3008
74_2		SAMN23455311	SRR17044046	170833	3987233	4158066	4157413	61517	49312	0.005632	0.001416	47699	3808
74_3		SAMN23455312	SRR17044045	215473	5620862	5836335	5835447	63681	55631	0.005276	0.001332	53837	3972
74_4		SAMN23455313	SRR17044044	218984	5028308	5247292	5246483	63106	53179	0.004996	0.001419	51379	3934
74_5		SAMN23455314	SRR17044042	202800	4453333	4656133	4655403	61862	51662	0.005329	0.001404	49968	3867
74_6		SAMN23455315	SRR17044041	217108	6014773	6231881	6230952	66044	57074	0.005387	0.001372	55065	4043
74_7		SAMN23455316	SRR17044040	154355	3305175	3459530	3458999	54207	44451	0.004371	0.001427	43167	3572
74_8		SAMN23455317	SRR17044039	149078	3039289	3188367	3187867	54564	43033	0.004487	0.001415	41734	3471
75_1	BVAL-610469	SAMN23455318	SRR17044038	73016	1183519	1256535	1256333	35407	22781	0.003254	0.001342	22305	2125
75_2		SAMN23455319	SRR17044037	117988	2002638	2120626	2120329	48001	35069	0.004134	0.001467	34126	3025
75_3		SAMN23455320	SRR17044036	136376	2811177	2947553	2947096	52952	41848	0.00463	0.001407	40700	3409
75_4		SAMN23455321	SRR17044035	144614	2940061	3084675	3084155	54161	42291	0.00447	0.00142	41101	3429
75_5		SAMN23455322	SRR17044034	200703	4448752	4649455	4648747	60936	51904	0.005663	0.001404	50250	3880
75_6		SAMN23455323	SRR17044033	187931	4232338	4420269	4419604	59589	51074	0.005165	0.001427	49385	3834
75_8		SAMN23455325	SRR17044030	140683	2721245	2861928	2861531	55097	41833	0.004736	0.00146	40630	3470
76_1	BVAL-610470	SAMN23455326	SRR17044029	186847	4323903	4510750	4510064	57968	50828	0.004557	0.001332	49347	3859
76_2		SAMN23455327	SRR17044028	154848	3129099	3283947	3283421	56715	43893	0.004393	0.0014	42686	3579
76_3		SAMN23455328	SRR17044027	191707	4253132	4444839	4444178	61834	51200	0.00467	0.001421	49669	3896
76_4		SAMN23455329	SRR17044026	138827	2770441	2909268	2908819	54910	41417	0.004331	0.001488	40273	3418
76_5		SAMN23455330	SRR17044025	158738	3761894	3920632	3920064	58588	47974	0.004593	0.001362	46540	3754
76_6		SAMN23455331	SRR17044024	99155	1660964	1760119	1759851	44395	29921	0.003716	0.00142	29197	2711
76_7		SAMN23455332	SRR17044023	217234	5432222	5649456	5648543	64520	55866	0.00515	0.001377	53933	4005
76_8		SAMN23455333	SRR17044022	137604	2871770	3009374	3008885	52638	42218	0.004264	0.001454	41052	3492
77_1	BVAL-610475	SAMN23455334	SRR17044019	240886	5925295	6166181	6165247	57991	50728	0.003533	0.001233	49409	3878
77_2		SAMN23455335	SRR17044018	230354	9670906	9901260	9899771	69580	59133	0.00437	0.001232	57251	4106
77_3		SAMN23455336	SRR17044017	239534	6380894	6620428	6619419	64634	54722	0.003477	0.001192	53226	3958
77_4		SAMN23455337	SRR17044016	273629	12013717	12287346	12285483	73154	63022	0.003977	0.001167	61003	4136
77_5		SAMN23455338	SRR17044015	242405	6526347	6768752	6767753	65851	56003	0.003678	0.001237	54432	3992
77_6		SAMN23455339	SRR17044014	236750	9095241	9331991	9330580	68012	57954	0.003884	0.00122	56197	4101
77_7		SAMN23455340	SRR17044013	98451	1715877	1814328	1814093	40535	22606	0.003704	0.001335	22039	2065
77_8		SAMN23455341	SRR17044012	247674	5801955	6049629	6048708	61177	51713	0.0035	0.001198	50405	3869
78_1	BVAL-610487	SAMN23455342	SRR17044011	107852	1897818	2005670	2005361	47877	33647	0.003844	0.001392	32833	2903
78_2		SAMN23455343	SRR17044010	217380	7402024	7619404	7618259	68725	60256	0.005547	0.001414	58098	4108
78_3		SAMN23455344	SRR17044008	222369	6046077	6268446	6267476	66230	58055	0.004611	0.001349	56169	4077
78_4		SAMN23455345	SRR17044007	173542	3924800	4098342	4097704	59252	50095	0.004585	0.001425	48625	3814
78_5		SAMN23455346	SRR17044006	213968	4563045	4777013	4776251	61573	52328	0.004593	0.001379	50685	3911
78_6		SAMN23455347	SRR17044005	107117	1805792	1912909	1912610	47327	32614	0.004169	0.001428	31774	2896
78_7		SAMN23455348	SRR17044004	198682	4461357	4660039	4659334	60931	51610	0.005253	0.001434	49974	3872
78_8		SAMN23455349	SRR17044003	89245	1315297	1404542	1404302	44155	26586	0.003651	0.001374	25954	2443
79_1	BVAL-610547	SAMN23455350	SRR17044002	106472	1762020	1868492	1868218	47118	31448	0.004355	0.001516	30616	2862
79_2		SAMN23455351	SRR17044001	98596	1685039	1783635	1783385	43737	30813	0.003967	0.001376	30089	2656
79_3		SAMN23455352	SRR17044000	129536	2578847	2708383	2707957	53188	40383	0.003954	0.001434	39310	3377
79_4		SAMN23455353	SRR17043999	212868	6055857	6268725	6267772	65030	57370	0.005513	0.001347	55287	4047
79_5		SAMN23455354	SRR17043997	159963	3788383	3948346	3947735	58308	47564	0.004838	0.00139	46112	3754
79_6		SAMN23455355	SRR17043996	166174	3823316	3989490	3988913	56852	49069	0.005534	0.001372	47464	3751
79_7		SAMN23455356	SRR17043995	220576	5808407	6028983	6028069	64385	55661	0.005565	0.001406	53765	4004
79_8		SAMN23455357	SRR17043994	89676	1520072	1609748	1609469	39719	27638	0.003892	0.001442	26956	2534
80_1	BVAL-610635	SAMN23455358	SRR17043993	65232	1000826	1066058	1065907	31640	20536	0.003579	0.001432	20077	1975
80_2		SAMN23455359	SRR17043992	91487	1405794	1497281	1497021	42714	27555	0.00378	0.001481	26870	2529
80_3		SAMN23455360	SRR17043991	97755	1770102	1867857	1867567	40961	31208	0.003598	0.001353	30492	2867
80_4		SAMN23455361	SRR17043990	80760	1163045	1243805	1243616	39691	24157	0.003927	0.001416	23590	2240
80_5		SAMN23455362	SRR17043989	96333	1507372	1603705	1603448	44817	29409	0.004199	0.001424	28679	2672
80_6		SAMN23455363	SRR17043988	100065	1619417	1719482	1719195	46197	29732	0.003857	0.001403	29009	2619
80_7		SAMN23455364	SRR17043986	125635	2286868	2412503	2412117	50215	36617	0.004239	0.001468	35643	3112
80_8		SAMN23455365	SRR17043985	82590	1195575	1278165	1277971	42051	23650	0.00372	0.001464	23101	2218
82_1	BVAL-610637	SAMN23455366	SRR17043984	109192	1604151	1713343	1713088	47898	37524	0.003589	0.001344	36639	3058
82_2		SAMN23455367	SRR17043982	128156	1974247	2102403	2102089	53519	41657	0.003792	0.001417	40595	3292
82_3		SAMN23455368	SRR17044435	110592	1721517	1832109	1831839	47716	36956	0.003624	0.001382	36124	3118
82_4		SAMN23455369	SRR17044434	131486	2239956	2371442	2371120	54229	44043	0.003863	0.001315	42915	3392
82_5		SAMN23455370	SRR17044433	127322	2200588	2327910	2327558	51531	41125	0.00429	0.001369	40071	3365
82_6		SAMN23455371	SRR17044432	152154	2799023	2951177	2950747	58375	47916	0.00412	0.001342	46718	3663
82_7		SAMN23455372	SRR17044431	177426	3609544	3786970	3786379	59375	50701	0.004325	0.00134	49333	3904
82_8		SAMN23455373	SRR17044430	136500	2356097	2492597	2492258	54530	44118	0.003709	0.001379	43004	3543
83_1	BVAL-610675	SAMN23455374	SRR17044428	90932	1512191	1603123	1602856	40115	28687	0.00313	0.001411	28053	2613
83_2		SAMN23455375	SRR17044427	95098	1610738	1705836	1705587	42465	29914	0.003899	0.00144	29176	2677
83_3		SAMN23455376	SRR17044426	73168	1021877	1095045	1094858	37221	21007	0.003366	0.001499	20537	2024
83_4		SAMN23455377	SRR17044425	121051	2024264	2145315	2144996	51236	34883	0.003059	0.001414	34089	3012
83_5		SAMN23455378	SRR17044424	92956	1588681	1681637	1681385	40890	29901	0.00381	0.001377	29168	2710
83_6		SAMN23455379	SRR17044423	100026	1742584	1842610	1842330	44990	31174	0.004032	0.001392	30422	2797
83_7		SAMN23455380	SRR17044422	71213	1155814	1227027	1226842	33811	23685	0.003438	0.001286	23209	2120
83_8		SAMN23455381	SRR17044421	74965	1145310	1220275	1220084	36538	22639	0.003873	0.001475	22107	2208
84_1	BVAL-610734	SAMN23455382	SRR17044420	107178	1853344	1960522	1960218	40287	28387	0.002945	0.001262	27838	2570
84_2		SAMN23455383	SRR17044419	240860	5032213	5273073	5272249	59223	49100	0.004428	0.001269	47719	3795
84_3		SAMN23455384	SRR17044417	130915	2419440	2550355	2549958	46909	31974	0.003101	0.001262	31351	2842
84_4		SAMN23455385	SRR17044416	238980	4976835	5215815	5214995	58007	47136	0.003936	0.001157	46020	3764
84_5		SAMN23455386	SRR17044415	190250	4156714	4346964	4346294	55940	43938	0.003417	0.001261	42897	3586
84_6		SAMN23455387	SRR17044414	207397	4394452	4601849	4601179	57220	46939	0.003963	0.001286	45728	3653
84_8		SAMN23455388	SRR17044413	241967	6628963	6870930	6869892	65320	54110	0.003687	0.00125	52650	3957
85_1	BVAL-610750	SAMN23455389	SRR17044412	56830	756378	813208	813073	29947	17615	0.00319	0.001448	17269	1758
85_2		SAMN23455390	SRR17044411	75826	1237701	1313527	1313318	35053	24331	0.003417	0.001371	23802	2295
85_3		SAMN23455391	SRR17044410	87812	1477402	1565214	1564982	39000	28227	0.003686	0.001373	27569	2604
85_4		SAMN23455392	SRR17044409	71989	1166011	1238000	1237800	33385	23767	0.003607	0.00139	23227	2170
85_5		SAMN23455393	SRR17044408	72066	1038969	1111035	1110849	35643	22506	0.003438	0.001452	22012	2105
85_6		SAMN23455394	SRR17044406	72145	982152	1054297	1054131	38328	21017	0.00326	0.001381	20568	2081
85_7		SAMN23455395	SRR17044405	130090	2849420	2979510	2979022	42173	32784	0.003381	0.001258	31999	2855
85_8		SAMN23455396	SRR17044404	107152	2309949	2417101	2416738	37546	27191	0.002934	0.001235	26615	2477
86_1	BVAL-610776	SAMN23455397	SRR17044403	131220	3137322	3268542	3268040	41884	32942	0.003414	0.001237	32154	2928
86_2		SAMN23455398	SRR17044402	162167	3689525	3851692	3851084	50188	37883	0.003699	0.001295	36945	3249
86_3		SAMN23455399	SRR17044401	127265	2841991	2969256	2968767	40113	30438	0.00294	0.001228	29803	2759
86_4		SAMN23455400	SRR17044400	172116	4665102	4837218	4836468	52097	41910	0.003846	0.001272	40820	3471
86_5		SAMN23455401	SRR17044399	164905	4110749	4275654	4275038	52815	40885	0.004164	0.001229	39793	3367
86_6		SAMN23455402	SRR17044398	188168	4859490	5047658	5046861	54613	43145	0.003714	0.001283	42072	3496
86_7		SAMN23455403	SRR17044397	184987	4783193	4968180	4967421	54519	42400	0.003668	0.001303	41295	3497
86_8		SAMN23455404	SRR17044395	131805	2960404	3092209	3091768	47481	32352	0.003156	0.001281	31617	2875
87_1	Melange	SAMN23455405	SRR17044394	238200	4985653	5223853	5223065	54793	47940	0.003513	0.001222	46753	3772
87_2		SAMN23455406	SRR17044393	162645	3319054	3481699	3481166	52097	41827	0.003057	0.001068	40918	3277
87_3		SAMN23455407	SRR17044392	237523	8080974	8318497	8317197	65571	57147	0.004442	0.001265	55339	4057
87_4		SAMN23455408	SRR17044391	303980	15474842	15778822	15776408	73810	64190	0.00372	0.001125	62134	4123
87_5		SAMN23455409	SRR17044390	128571	2431972	2560543	2560146	43241	32826	0.003206	0.001295	32140	2833
87_6		SAMN23455410	SRR17044389	237090	6846446	7083536	7082517	61762	53340	0.003978	0.001226	51848	3929
87_7		SAMN23455411	SRR17044388	127727	2347538	2475265	2474944	44063	34734	0.003553	0.001242	33977	2810
87_8		SAMN23455412	SRR17044387	76712	1142003	1218715	1218533	34613	18914	0.002847	0.001355	18543	1789
88_1	Bonela	SAMN23455413	SRR17044386	234585	4942471	5177056	5176303	58824	48878	0.004142	0.001225	47563	3743
88_2		SAMN23455414	SRR17044384	162230	3047838	3210068	3209539	55779	38046	0.003437	0.001325	37197	3284
88_3		SAMN23455415	SRR17044383	242303	6485331	6727634	6726579	62864	52561	0.004176	0.00124	51119	3958
88_4		SAMN23455416	SRR17044382	235874	5011530	5247404	5246594	61207	51140	0.003629	0.00124	49995	3774
88_5		SAMN23455417	SRR17044381	168692	3457942	3626634	3626012	54629	40717	0.003881	0.001296	39735	3373
88_6		SAMN23455418	SRR17044380	195723	4304732	4500455	4499774	56327	45209	0.004113	0.001301	43978	3646
88_7		SAMN23455419	SRR17044379	241769	6073606	6315375	6314431	62869	53274	0.003896	0.001241	51870	3934
88_8		SAMN23455420	SRR17044378	221043	9630078	9851121	9849542	73805	64191	0.004753	0.001239	62195	4106
89_1	Steirische Riese	SAMN23455421	SRR17044377	242274	6943147	7185421	7184310	65700	55684	0.004376	0.001298	53967	4002
89_2		SAMN23455422	SRR17044376	115568	2251924	2367492	2367131	42182	28453	0.002992	0.001218	27880	2579
89_3		SAMN23455423	SRR17044375	163745	3275437	3439182	3438675	55077	41179	0.00372	0.00127	40213	3310
89_4		SAMN23455424	SRR17044373	156104	2993316	3149420	3148960	51549	37761	0.003696	0.001259	36863	3199
89_5		SAMN23455425	SRR17044372	238992	5940200	6179192	6178235	62866	53181	0.004292	0.001225	51694	3920
89_6		SAMN23455426	SRR17044371	104928	1701049	1805977	1805674	40142	26236	0.002705	0.001244	25757	2388
89_7		SAMN23455427	SRR17044370	244752	6281410	6526162	6525153	63321	52439	0.004047	0.00124	50959	3948
89_8		SAMN23455428	SRR17044369	134299	2640451	2774750	2774324	45756	34962	0.002999	0.001299	34236	2982
91_1	Hestia	SAMN23455429	SRR17044368	97901	1591959	1689860	1689609	39073	23419	0.003225	0.001383	22888	2168
91_2		SAMN23455430	SRR17044367	69605	954734	1024339	1024180	33850	16350	0.002897	0.001353	16033	1680
91_3		SAMN23455431	SRR17044366	87340	1234783	1322123	1321922	40358	19978	0.002704	0.001376	19577	1896
91_4		SAMN23455432	SRR17044365	70388	937040	1007428	1007286	36365	14908	0.00256	0.001349	14645	1436
91_5		SAMN23455433	SRR17044364	104309	1678266	1782575	1782296	42501	24845	0.003347	0.001304	24264	2314
91_6		SAMN23455434	SRR17044361	121626	2160187	2281813	2281459	45350	27652	0.003631	0.001341	26960	2500
91_7		SAMN23455435	SRR17044360	226991	4366059	4593050	4592332	61839	48453	0.004492	0.00128	47037	3642
91_8		SAMN23455436	SRR17044359	115544	2092358	2207902	2207560	42251	28215	0.003083	0.001306	27568	2478
92_2	Lady Di	SAMN23455438	SRR17044357	229184	8748365	8977549	8976251	70615	59790	0.004322	0.001194	57961	4076
92_3		SAMN23455439	SRR17044356	174125	3901262	4075387	4074805	55248	42921	0.003506	0.001228	41908	3541
92_4		SAMN23455440	SRR17044355	236902	4879664	5116566	5115807	65281	51992	0.003715	0.001205	50635	3695
92_5		SAMN23455441	SRR17044354	246215	7681999	7928214	7926971	64438	55134	0.003848	0.00121	53584	4041
92_6		SAMN23455442	SRR17044353	242993	5475923	5718916	5718041	61916	50220	0.003637	0.001254	48859	3875
92_7		SAMN23455443	SRR17044352	242886	5390892	5633778	5632916	59319	50362	0.003417	0.001254	49117	3794
92_8		SAMN23455444	SRR17044350	244709	5277255	5521964	5521105	59160	49251	0.00351	0.001241	48012	3788
93_1	Hara	SAMN23455445	SRR17044349	133578	2668448	2802026	2801602	45882	34422	0.003273	0.001233	33690	3006
93_2		SAMN23455446	SRR17044348	263408	11453618	11717026	11715224	71081	61912	0.004525	0.001175	59781	4137
93_3		SAMN23455447	SRR17044347	240485	8480128	8720613	8719234	67217	57635	0.003982	0.001222	56092	4084
93_4		SAMN23455448	SRR17044346	243601	5872428	6116029	6115117	60733	50389	0.003788	0.001261	49003	3930
93_5		SAMN23455449	SRR17044345	236472	5203418	5439890	5439114	61747	50801	0.004159	0.001259	49467	3849
93_6		SAMN23455450	SRR17044344	239388	5496742	5736130	5735275	60708	51346	0.004222	0.001285	49917	3845
93_7		SAMN23455451	SRR17044343	238720	4959640	5198360	5197551	60987	49630	0.003896	0.001262	48226	3784
93_8		SAMN23455452	SRR17044342	130561	2711850	2842411	2841991	45697	31940	0.003766	0.001313	31098	2798
94_1	Choco	SAMN23455453	SRR17044341	63575	1010127	1073702	1073521	29209	15376	0.00268	0.00108	15121	1512
94_2		SAMN23455454	SRR17044339	241915	6245913	6487828	6486782	61154	52977	0.003777	0.001253	51575	3909
94_3		SAMN23455455	SRR17044338	189920	4379814	4569734	4569084	53134	45292	0.003856	0.001225	44127	3617
94_4		SAMN23455456	SRR17044337	183912	4223678	4407590	4406927	51779	43669	0.003605	0.001195	42641	3591
94_5		SAMN23455457	SRR17044336	166184	3673295	3839479	3838901	50946	41601	0.003634	0.001239	40606	3451
94_6		SAMN23455458	SRR17044335	233467	4885829	5119296	5118551	57527	48634	0.003926	0.001226	47364	3743
94_7		SAMN23455459	SRR17044334	156731	2985727	3142458	3141967	49406	38238	0.003556	0.001271	37341	3182
94_8		SAMN23455460	SRR17044333	239499	5595930	5835429	5834515	57672	49686	0.004215	0.001238	48318	3880
95_1	Aldrian	SAMN23455461	SRR17044332	169900	3792251	3962151	3961566	51771	43451	0.003642	0.001216	42376	3531
95_2		SAMN23455462	SRR17044331	171099	3661277	3832376	3831725	55612	43841	0.004082	0.001279	42683	3345
95_3		SAMN23455463	SRR17044330	241745	5718192	5959937	5959035	60621	51752	0.004106	0.001194	50324	3889
95_4		SAMN23455464	SRR17044328	189504	3854988	4044492	4043861	58468	46243	0.004129	0.001235	45078	3437
95_5		SAMN23455465	SRR17044327	169653	3560028	3729681	3729166	54402	41634	0.003451	0.001268	40661	3449
95_6		SAMN23455466	SRR17044326	88388	1530353	1618741	1618468	38398	20741	0.003278	0.001272	20302	2035
95_7		SAMN23455467	SRR17044325	156399	3528141	3684540	3683993	48860	37056	0.003748	0.001302	36042	3175
95_8		SAMN23455468	SRR17044324	241847	5986176	6228023	6227065	62664	52101	0.00394	0.001247	50610	3913
96_1	Hellviolette	SAMN23455469	SRR17044323	54655	939682	994337	994190	23472	14751	0.00286	0.001289	14478	1466
96_2		SAMN23455470	SRR17044322	124967	2099467	2224434	2224090	46089	28935	0.003015	0.001262	28368	2728
96_3		SAMN23455471	SRR17044321	161068	3303211	3464279	3463748	52653	42724	0.004134	0.001265	41640	3343
96_4		SAMN23455472	SRR17044320	219462	4436845	4656307	4655562	58843	48118	0.004105	0.001308	46842	3614
96_5		SAMN23455473	SRR17044319	238344	5541902	5780246	5779407	64336	53383	0.004478	0.001286	51833	3890
96_6		SAMN23455474	SRR17044317	104377	1698986	1803363	1803091	40490	25168	0.002746	0.001299	24706	2386
96_7		SAMN23455475	SRR17044316	243646	5776357	6020003	6019094	60684	50289	0.003623	0.001256	48968	3888
96_8		SAMN23455476	SRR17044315	163123	3818570	3981693	3981123	50009	40269	0.004061	0.001312	39179	3345
97_1	Prijswinner	SAMN23455477	SRR17044314	96650	1818894	1915544	1915212	35061	24702	0.00296	0.001273	24212	2250
97_2		SAMN23455478	SRR17044313	72456	1192722	1265178	1265021	29620	19213	0.002346	0.001202	18897	1907
97_3		SAMN23455479	SRR17044312	226520	4939915	5166435	5165612	56019	46903	0.003648	0.001217	45679	3729
97_4		SAMN23455480	SRR17044311	167364	3531340	3698704	3698121	53920	40809	0.003487	0.001266	39779	3226
97_5		SAMN23455481	SRR17044310	156422	3237165	3393587	3393032	48892	36539	0.003616	0.001272	35666	3103
97_6		SAMN23455482	SRR17044309	216044	4522999	4739043	4738373	57364	47609	0.003719	0.001205	46418	3631
97_7		SAMN23455483	SRR17044308	246147	7120025	7366172	7365088	64739	55433	0.004031	0.001201	53903	3994
97_8		SAMN23455484	SRR17044306	240338	5181629	5421967	5421149	59378	50381	0.003788	0.001252	49049	3762
