# Supplementary material
Source: MDPI journal article supplement (https://www.mdpi.com/2073-4395/12/3/612)
Supplement: s1 [file s1 › Table S3 RemovedRetainedLoci.xlsx]

## Sheet: Tabelle1
	Removed loci	Retained loci
total_prefiltered_loci	0	149294
filtered_by_rm_duplicates	4099	145195
filtered_by_max_indels	77	145118
filtered_by_max_SNPs	47	145071
filtered_by_max_shared_het	493	144578
filtered_by_min_sample	140403	4175
total_filtered_loci		4175
