# Supplementary material
Source: MDPI journal article supplement (https://www.mdpi.com/2073-4395/12/3/612)
Supplement: s1 [file s1 › Table S4 Literature SNPs.xlsx]

## Sheet: Tabelle1
SNP ID	Position	Gene	Alleles	Traits	Reference
S03_40504942	Chr03:40504942..40504943	Phvul.003G181900	A/T	Days to flower & yield under heat	Oladzad et al., 2019
S03_41096424	Chr03:41096424..41096425	Phvul.003G187400	G/C	Days to flower under heat	Oladzad et al., 2019
S03_47356534	Chr03:47356534..47356535	Phvul.003G239000	A/G	Days to flower under heat	Oladzad et al., 2019
S1_54254560	Chr02:2048929..2048930	Phvul.002G019100	A/G	Bioclimatic variables	López-Hernández et al., 2019
S1_80309359	Chr02:28103728..28103729	Phvul.002G136100	G/T	Bioclimatic variables	López-Hernández et al., 2019
S1_105404421	Chr03:4157752..4157753	Phvul.003G038600	G/A	Bioclimatic variables	López-Hernández et al., 2019
S1_104075622	Chr03:2828953..2828954	Phvul.003G028300	T/A	Bioclimatic variables	López-Hernández et al., 2019
S1_103273611	Chr03:2026942..2026943	Phvul.003G021100	C/T	Bioclimatic variables	López-Hernández et al., 2019
S1_268677251	Chr06:28366668..28366669	Phvul.006G182100	C/T	Bioclimatic variables	López-Hernández et al., 2019
S1_381855152	Chr08:57808591..57808592	Phvul.008G227900	C/A	Bioclimatic variables	López-Hernández et al., 2019
