# Supplementary material
Source: MDPI journal article supplement (https://www.mdpi.com/2073-4395/12/3/612)

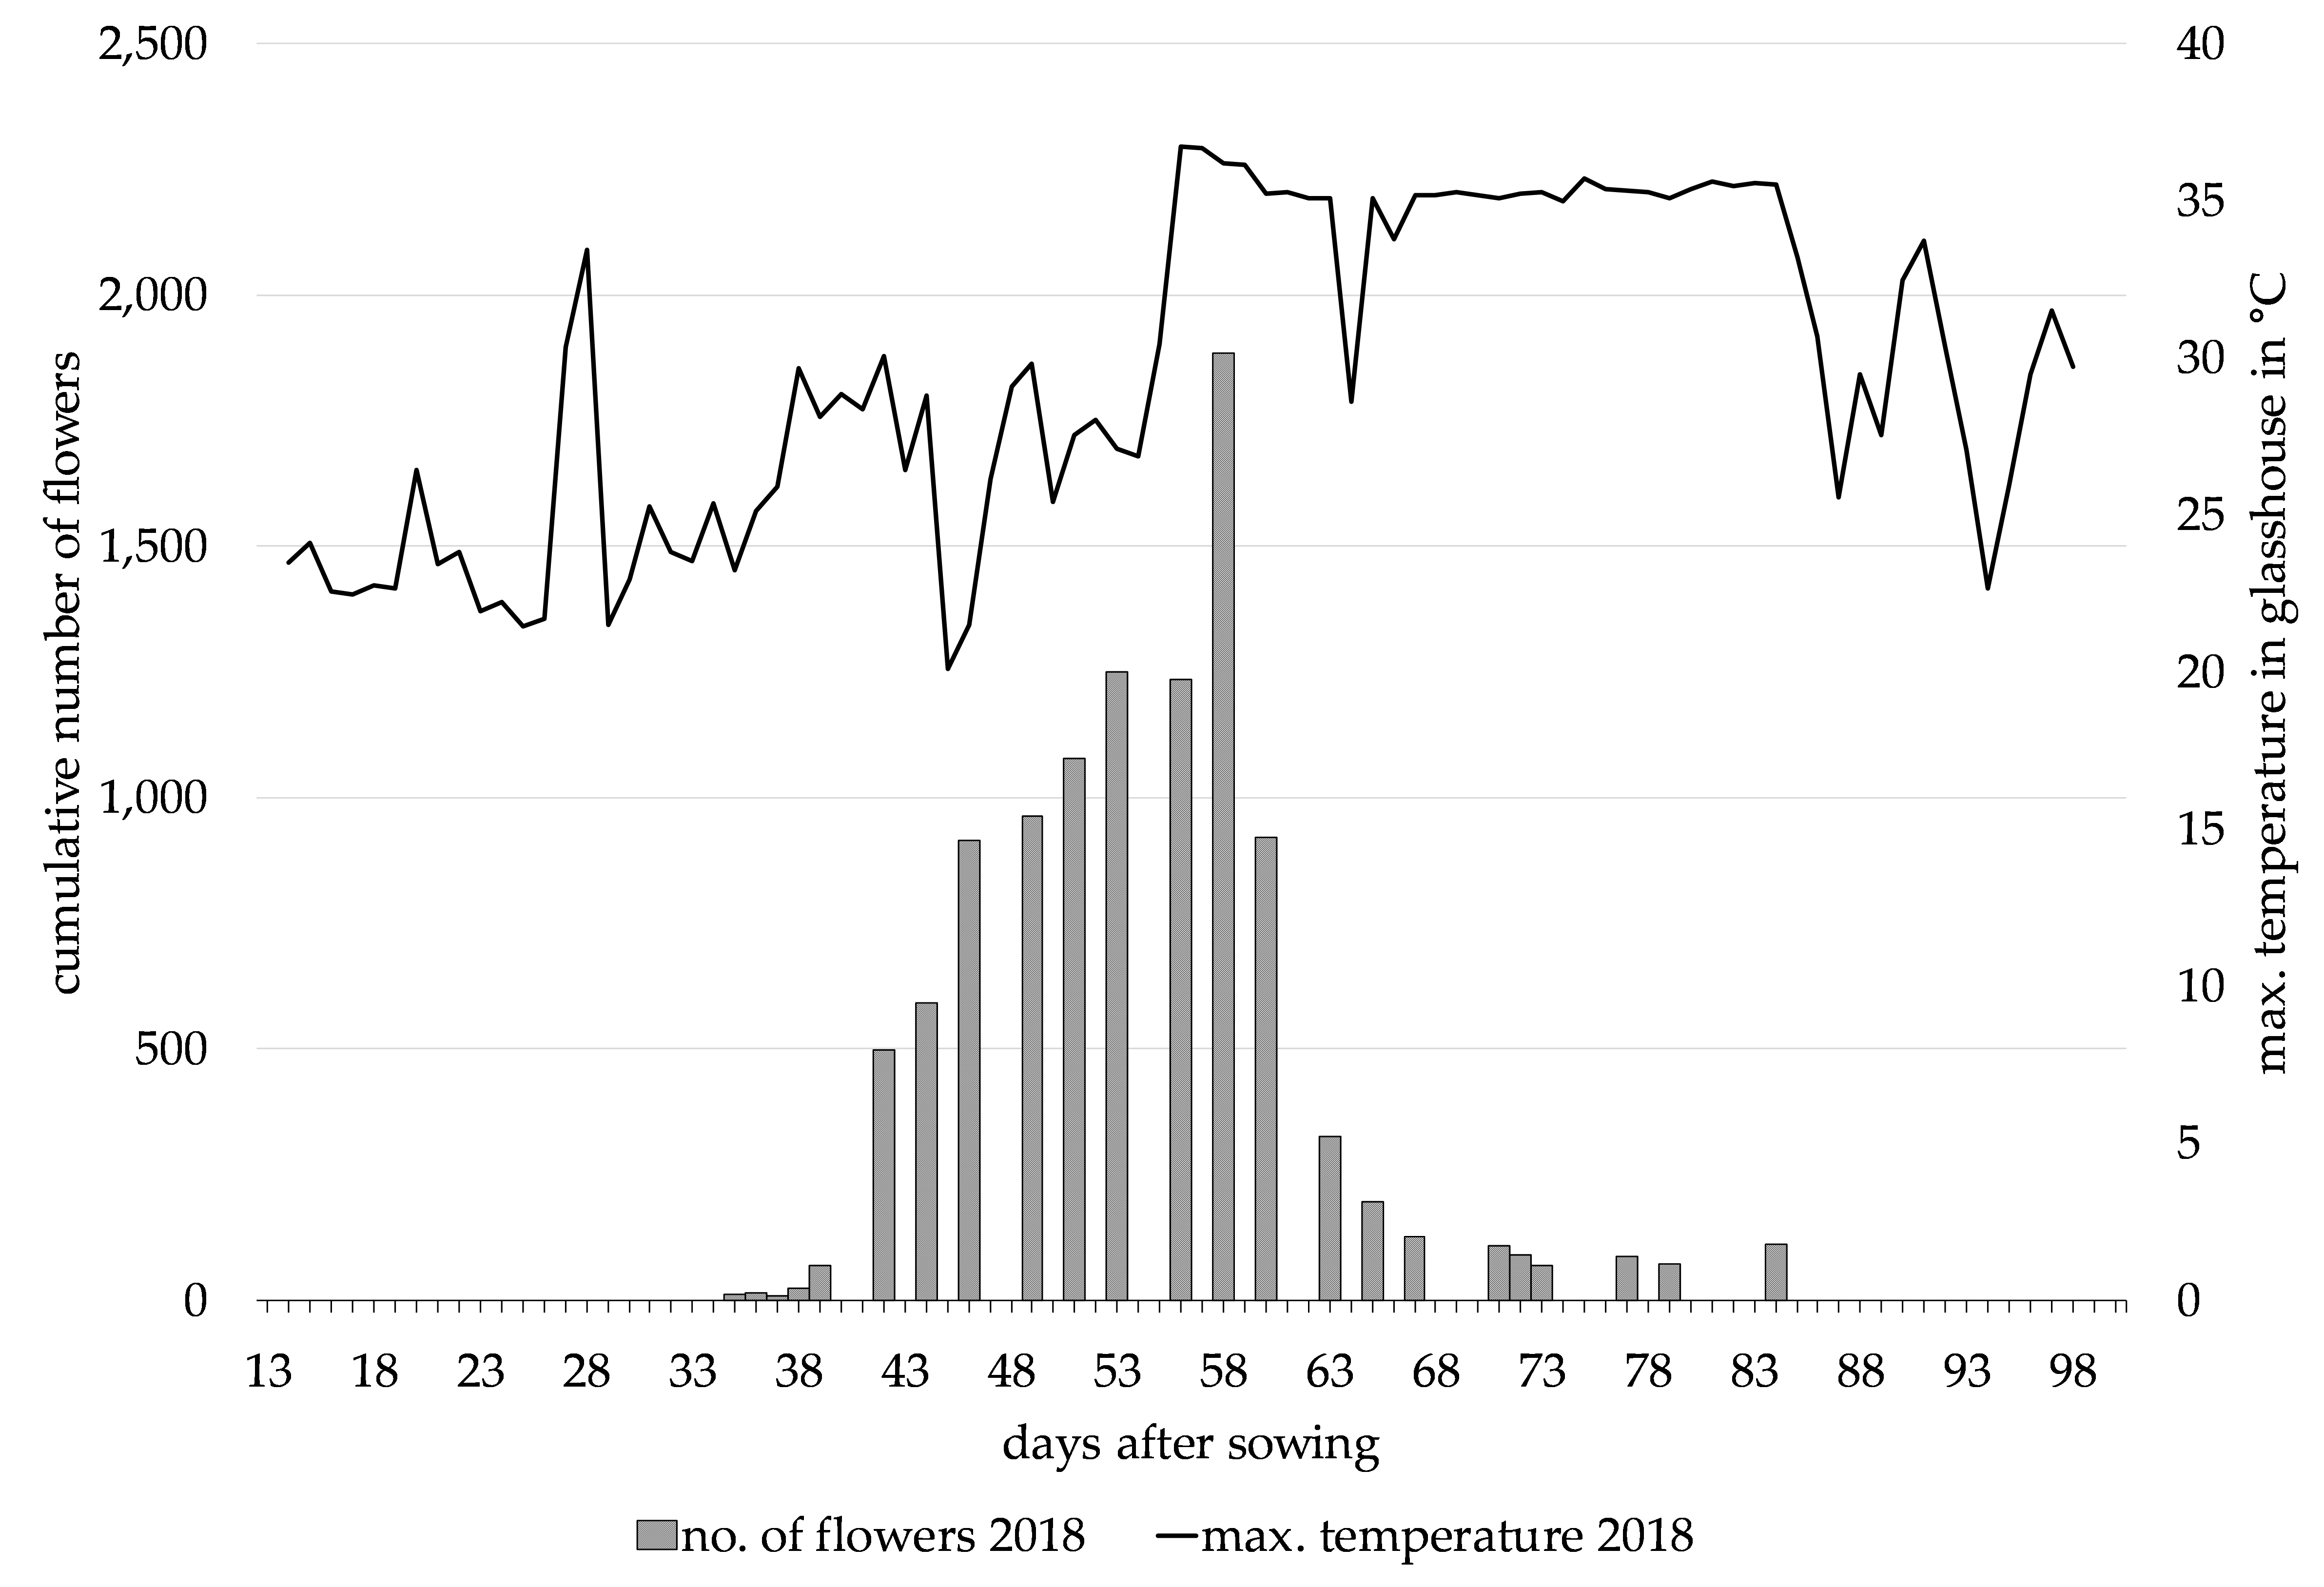

Supplement: s1 [file s1 › Figure S1 Heat and flowers 2018.png]

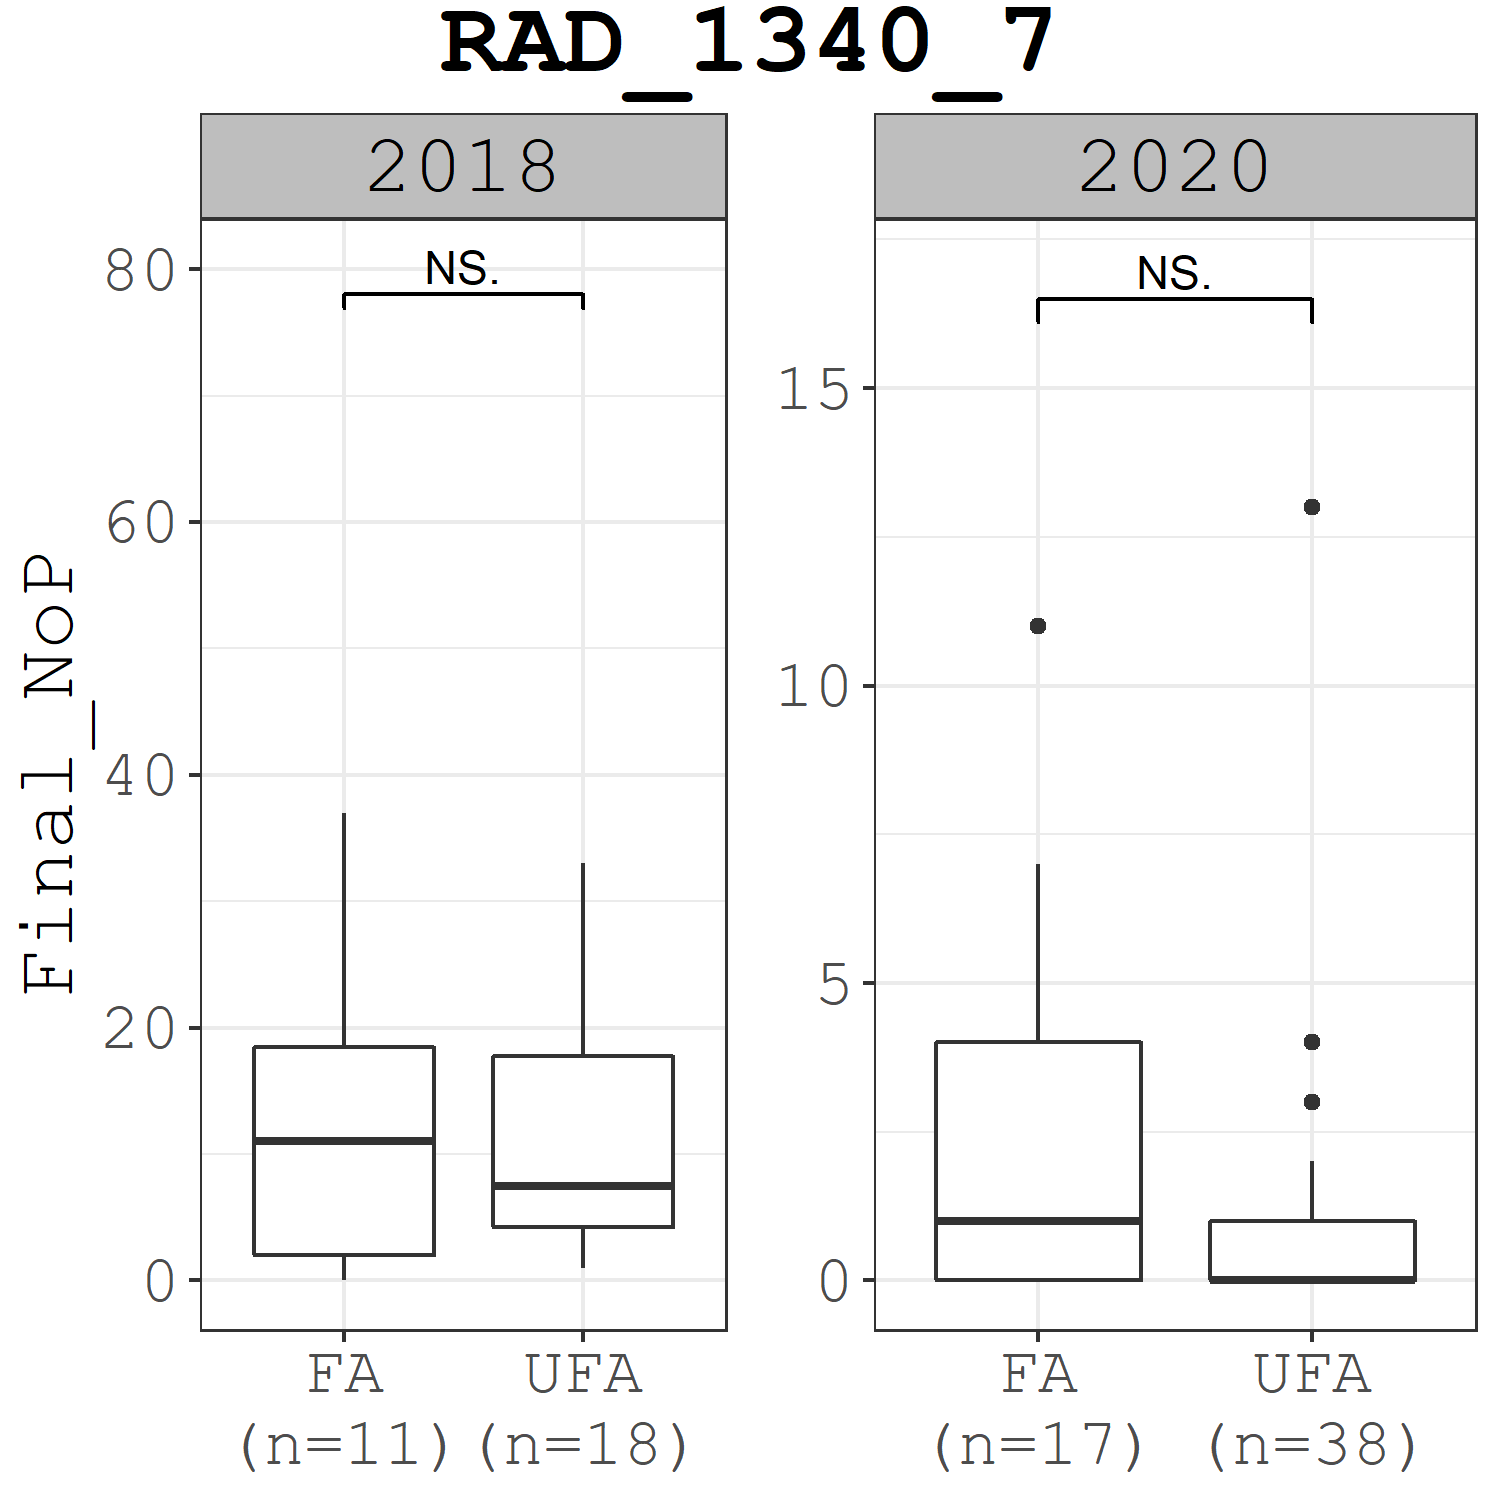

Supplement: s1 [file s1 › Figure S10 RAD_1340_7.png]

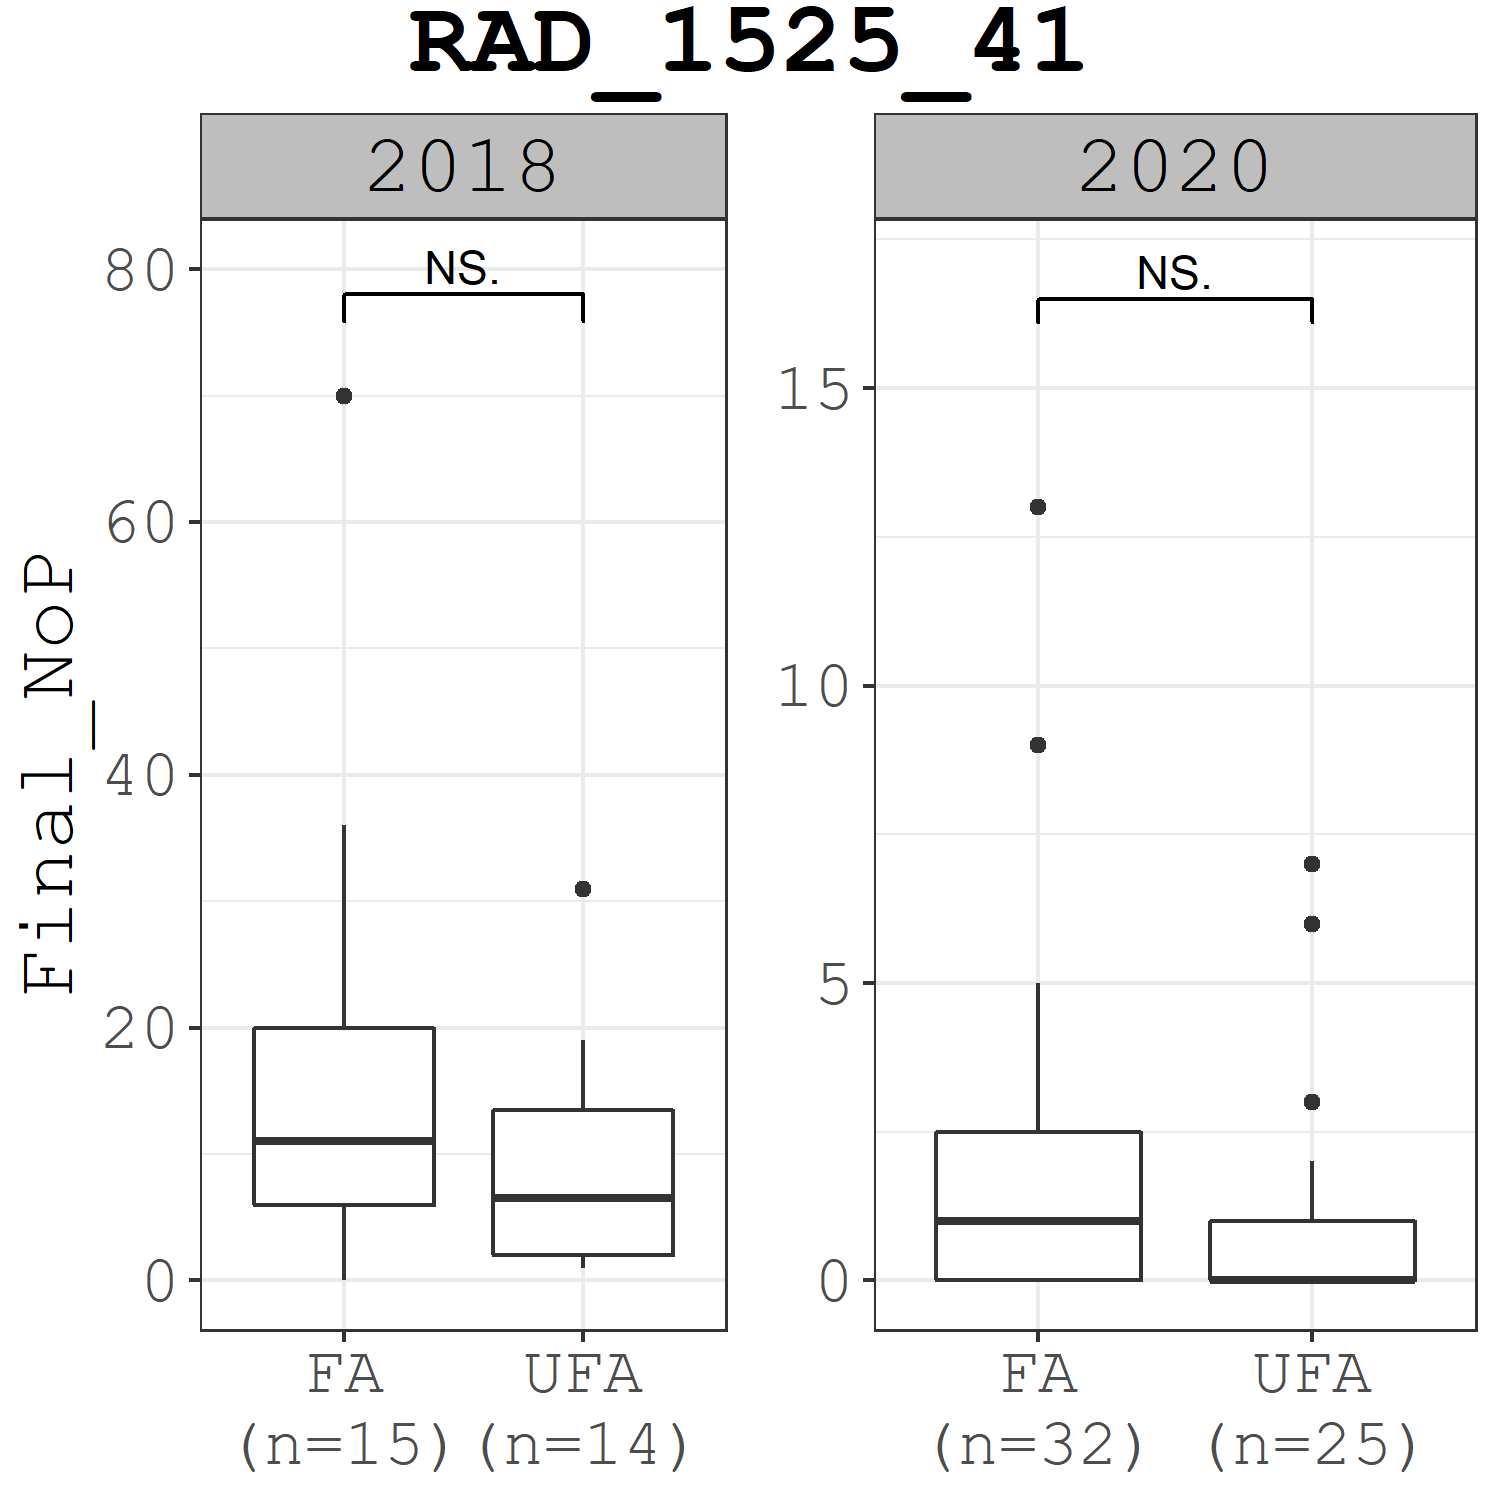

Supplement: s1 [file s1 › Figure S11 RAD_1525_41.png]

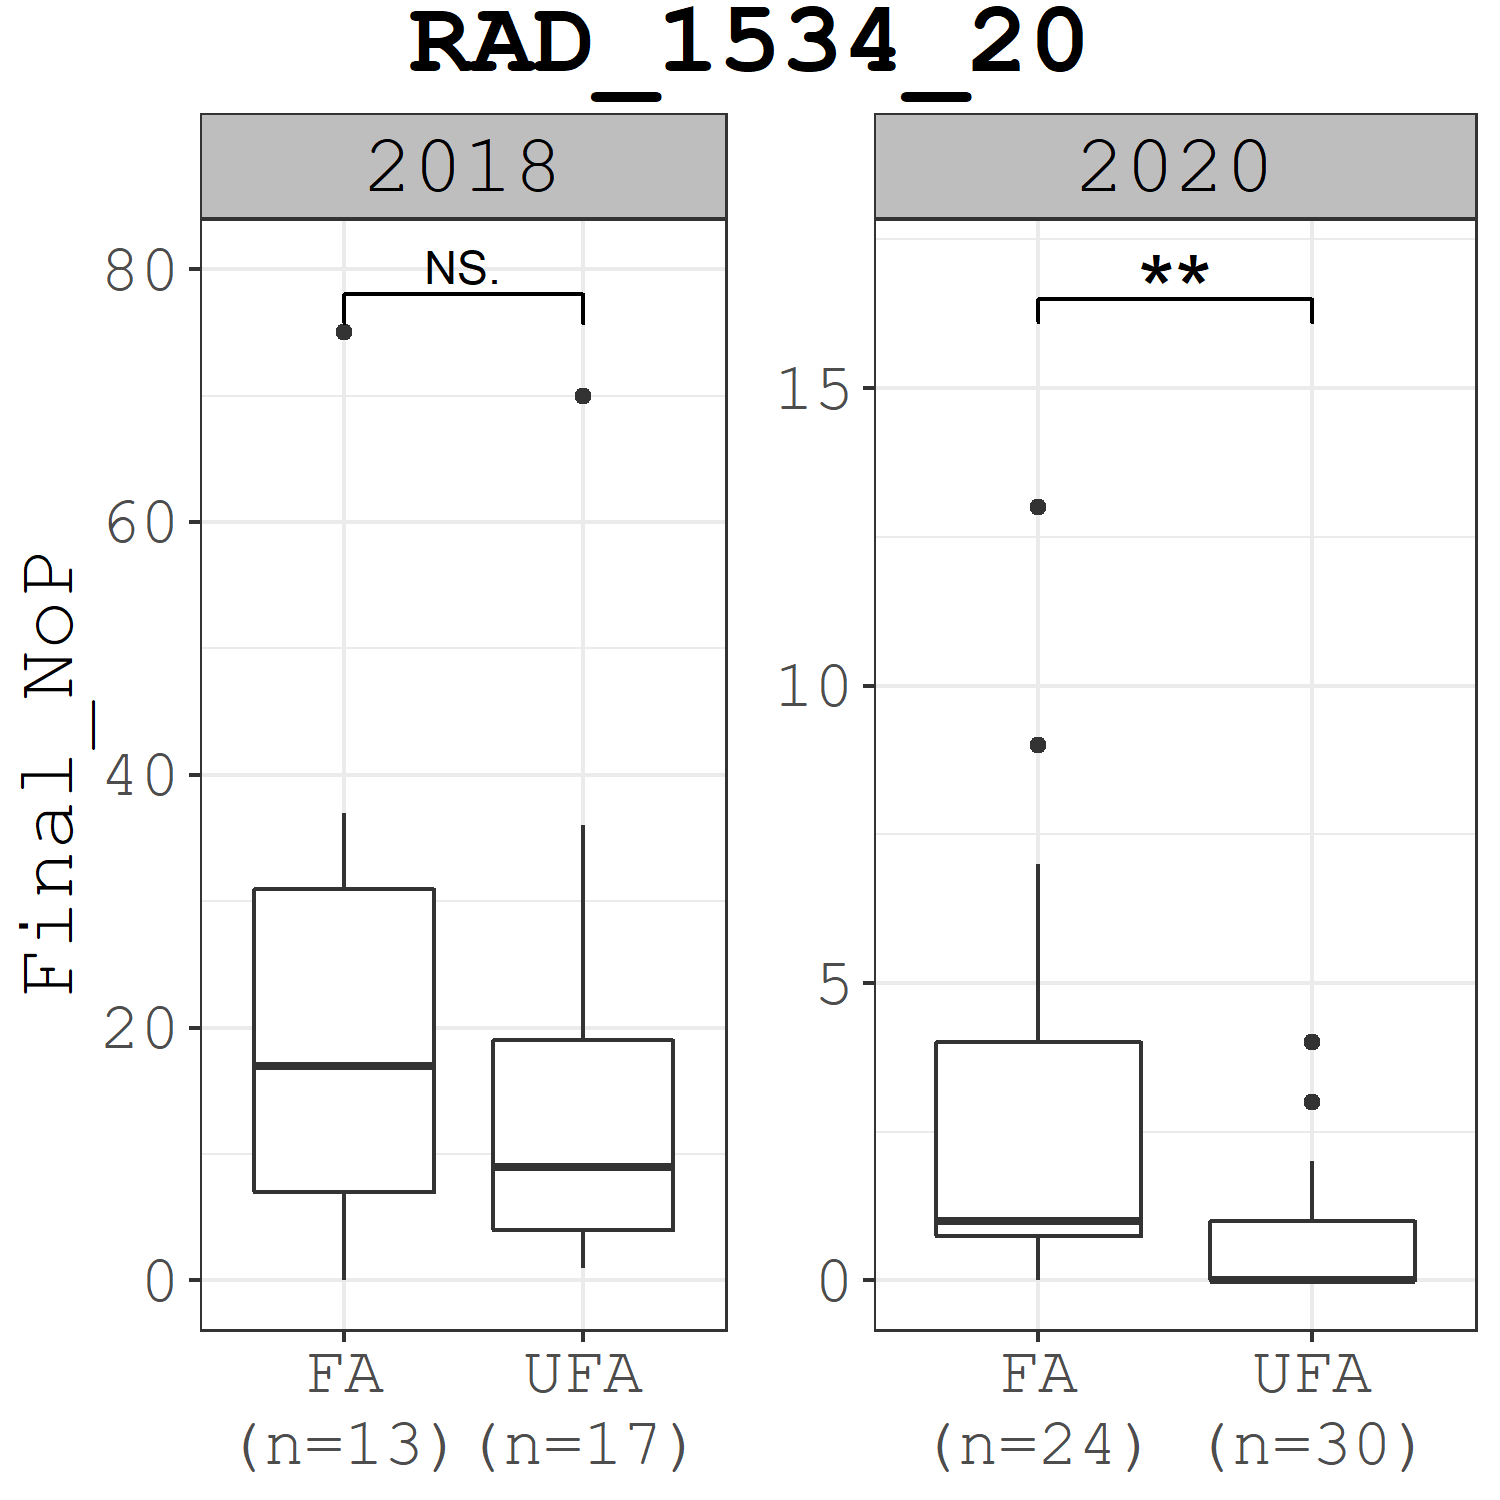

Supplement: s1 [file s1 › Figure S12 RAD_1534_20.png]

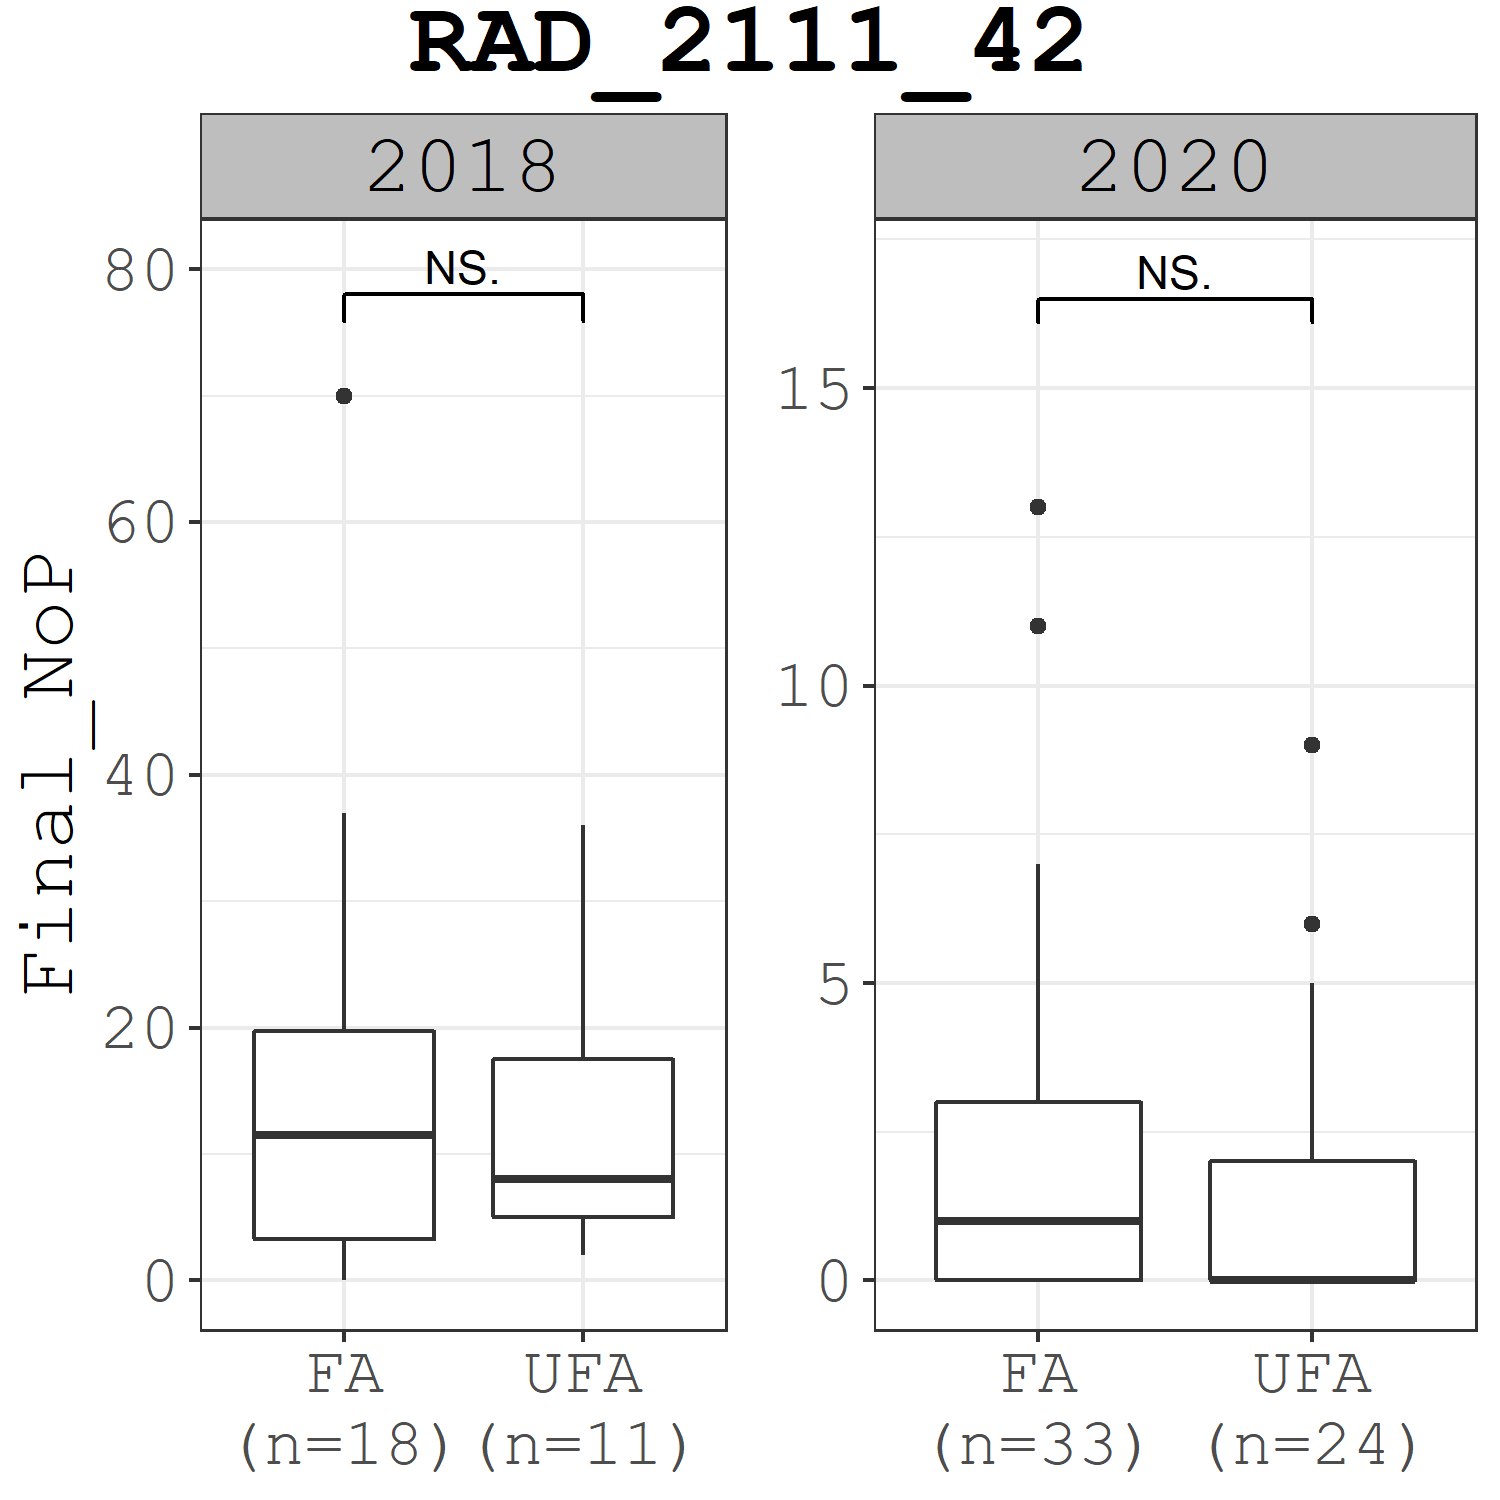

Supplement: s1 [file s1 › Figure S13 RAD_2111_42.png]

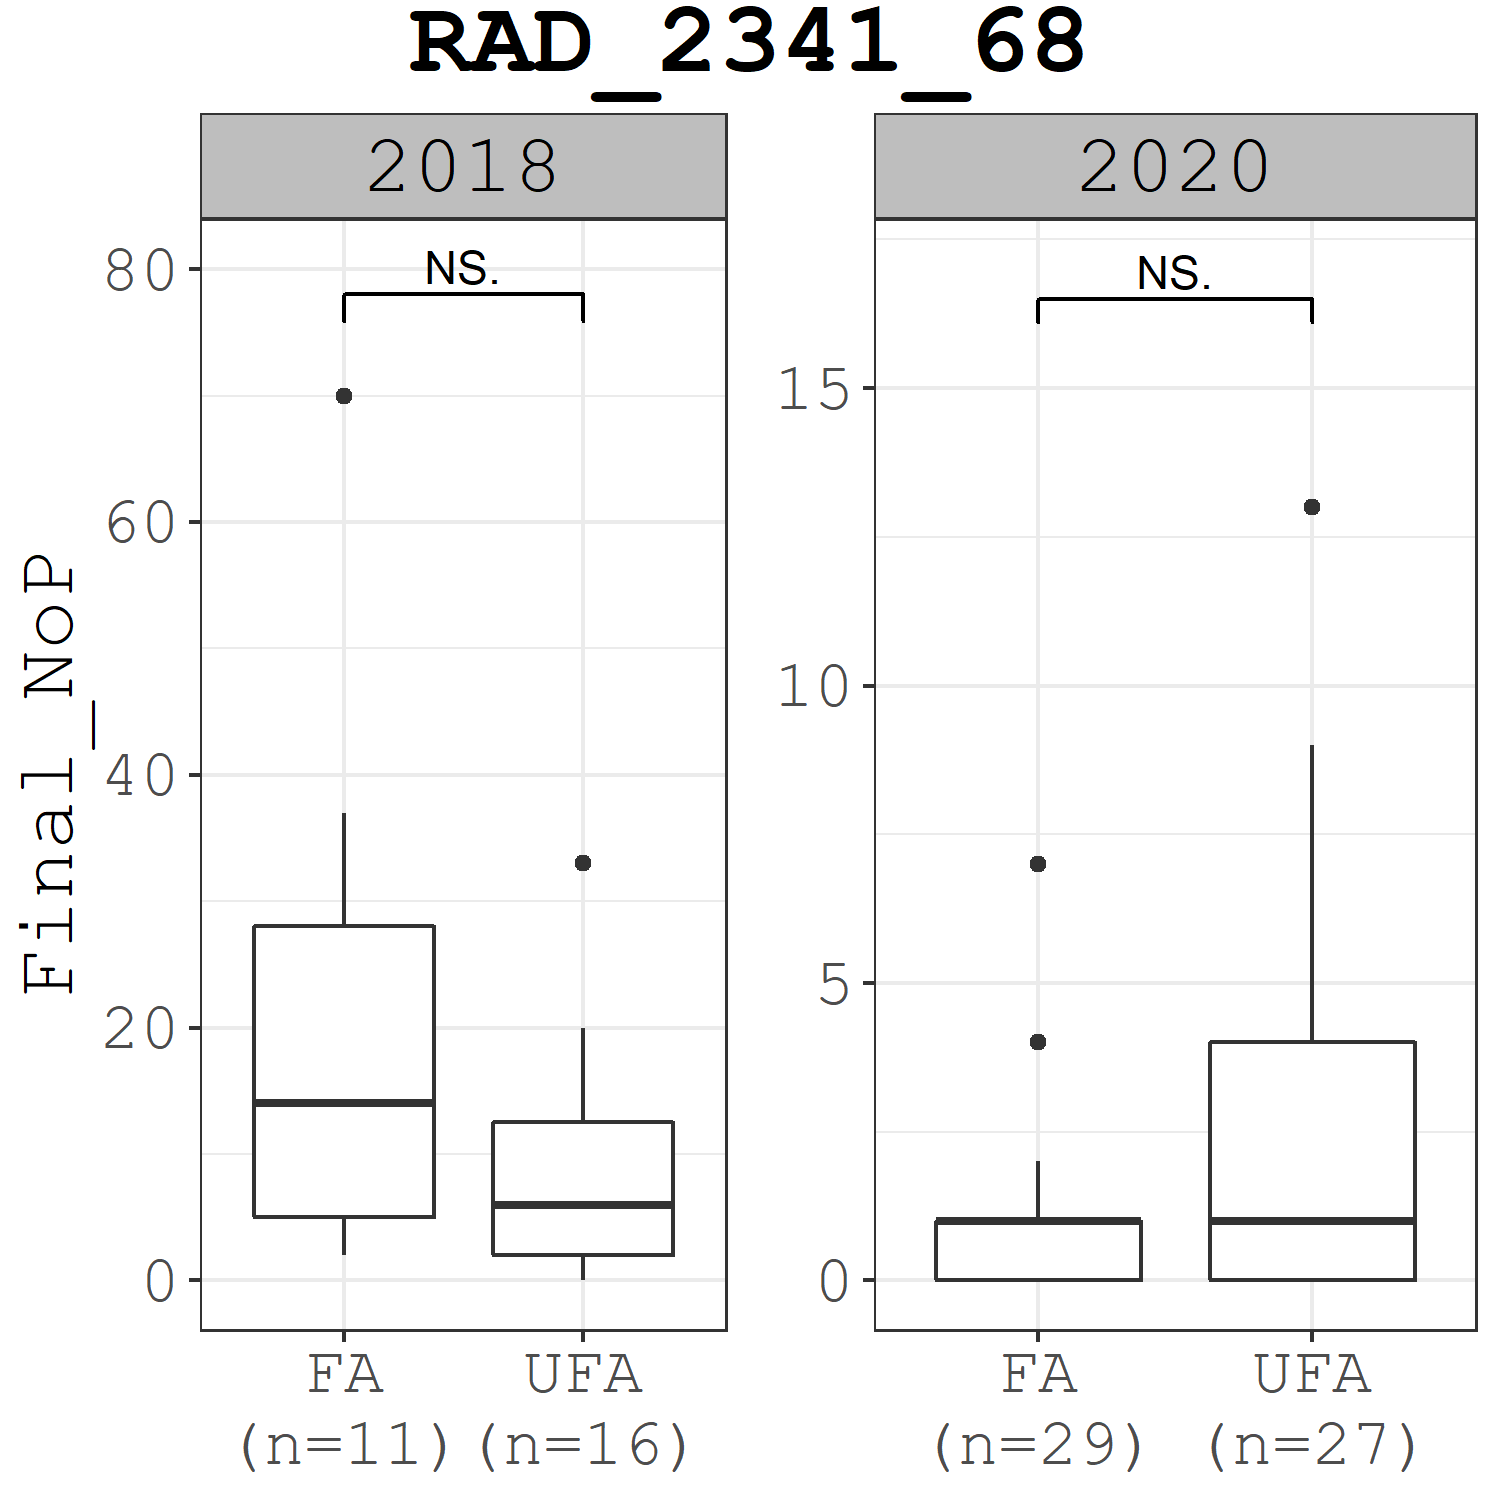

Supplement: s1 [file s1 › Figure S14 RAD_2341_68.png]

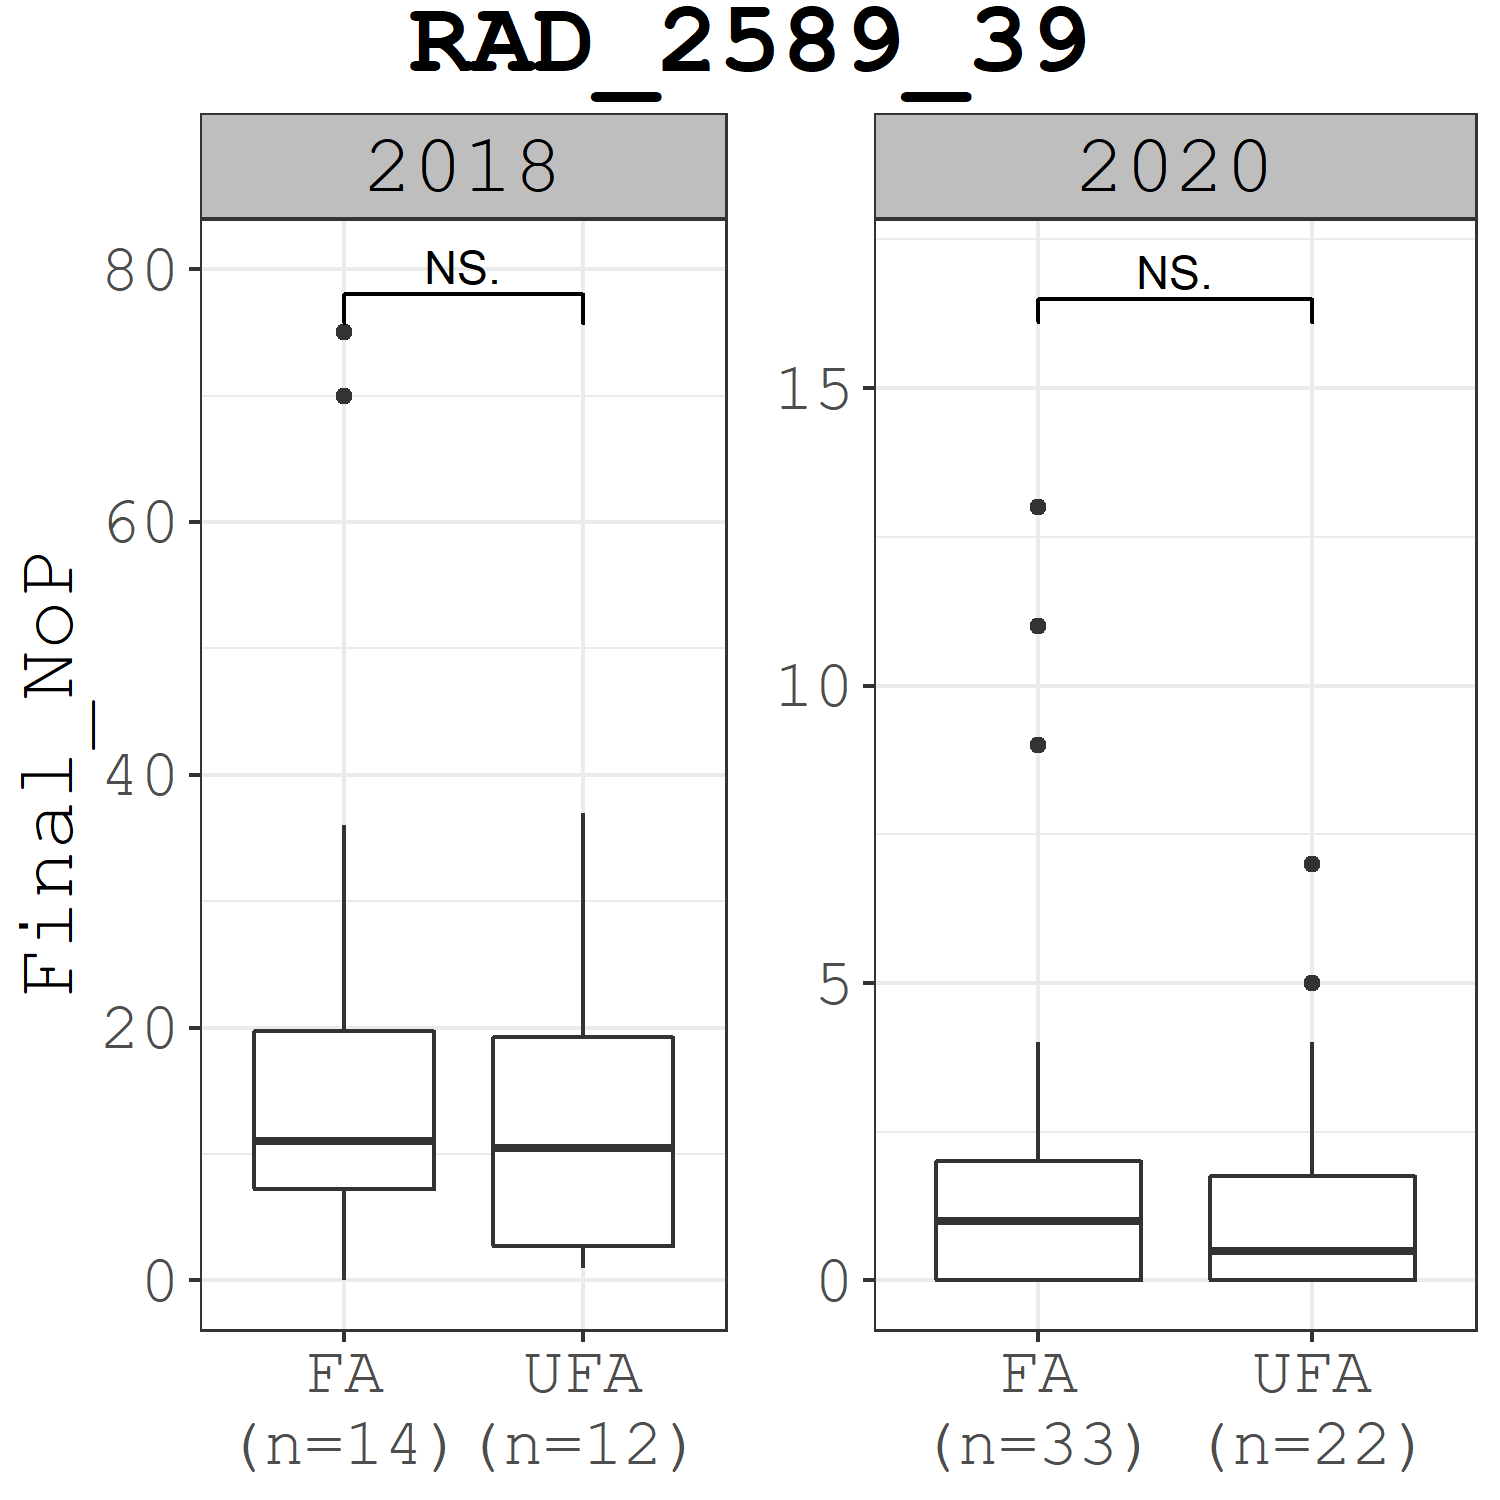

Supplement: s1 [file s1 › Figure S15 RAD_2589_39.png]

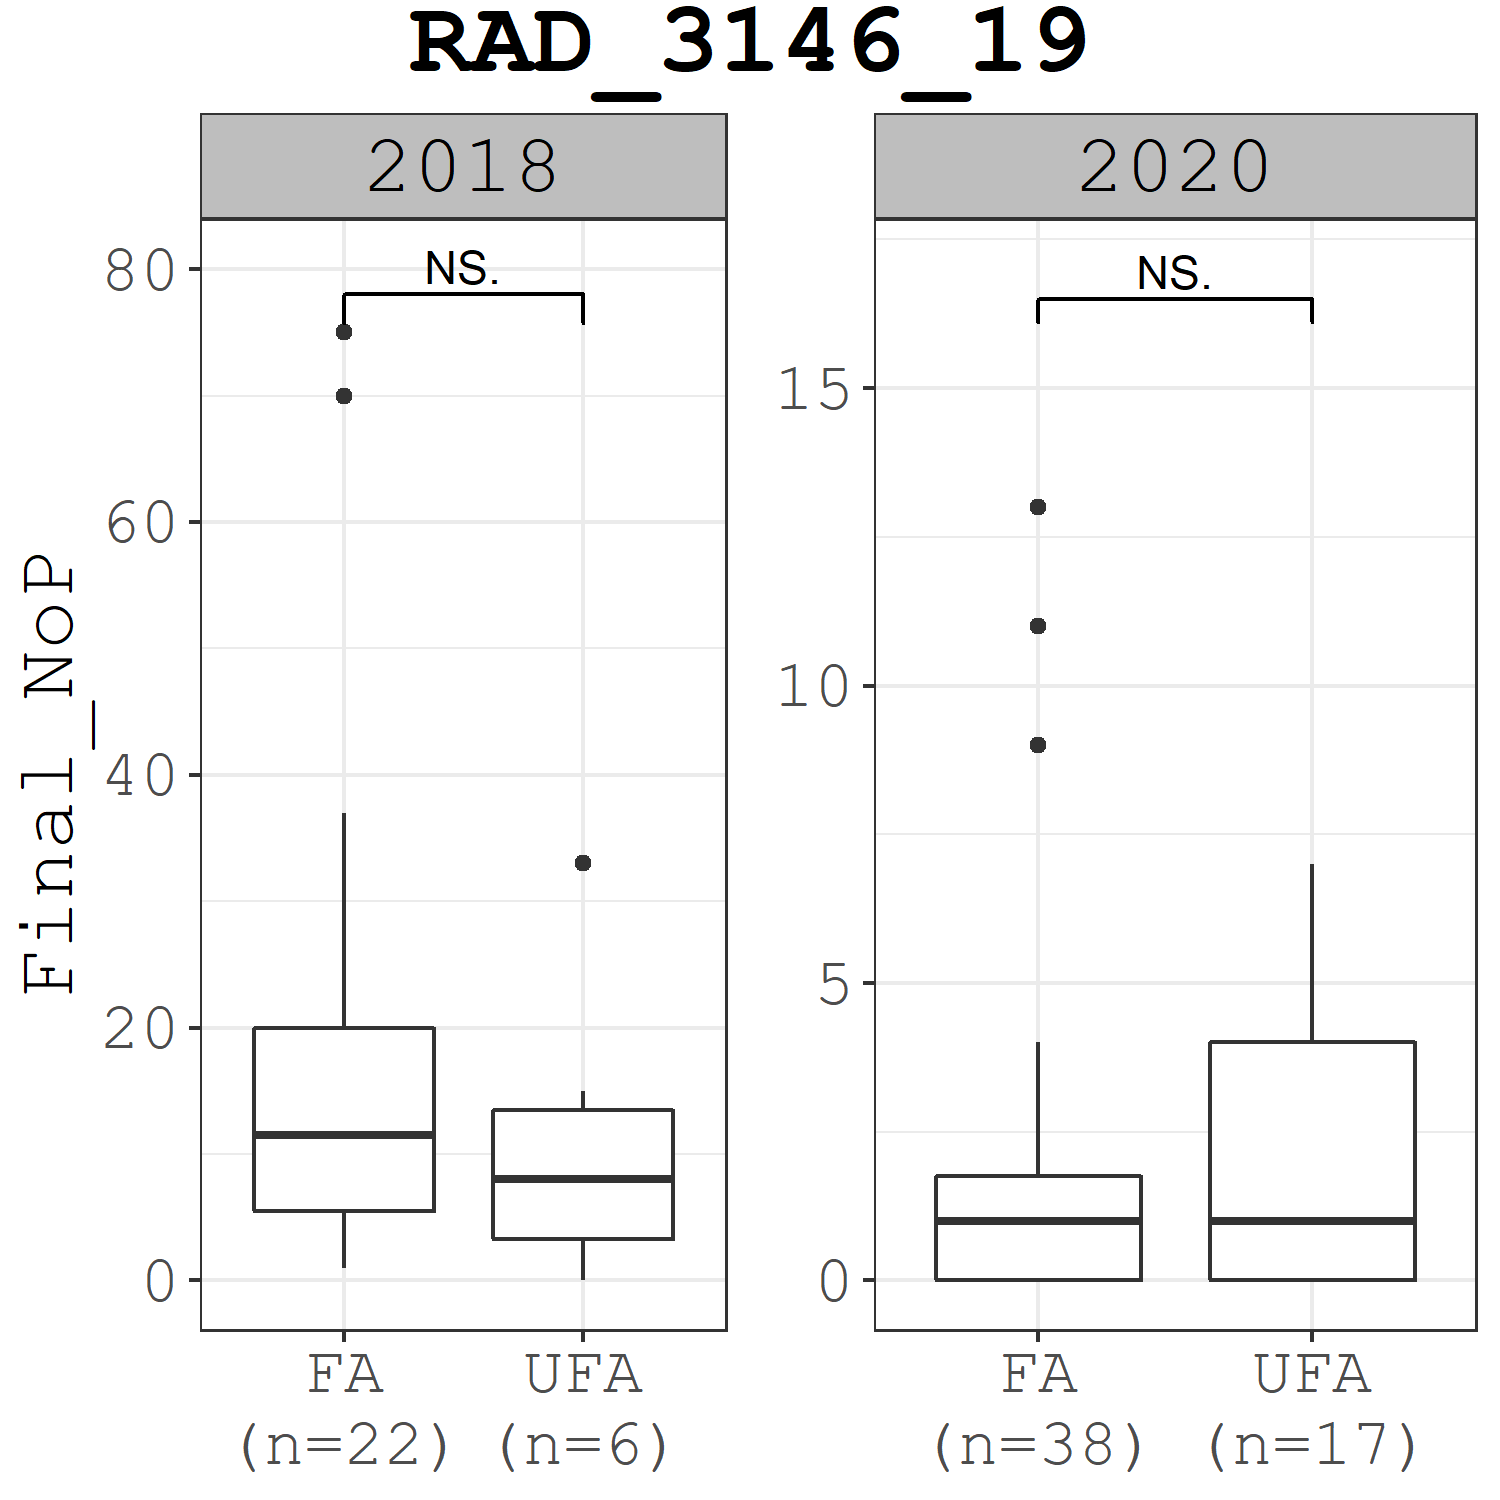

Supplement: s1 [file s1 › Figure S16 RAD_3146_19.png]

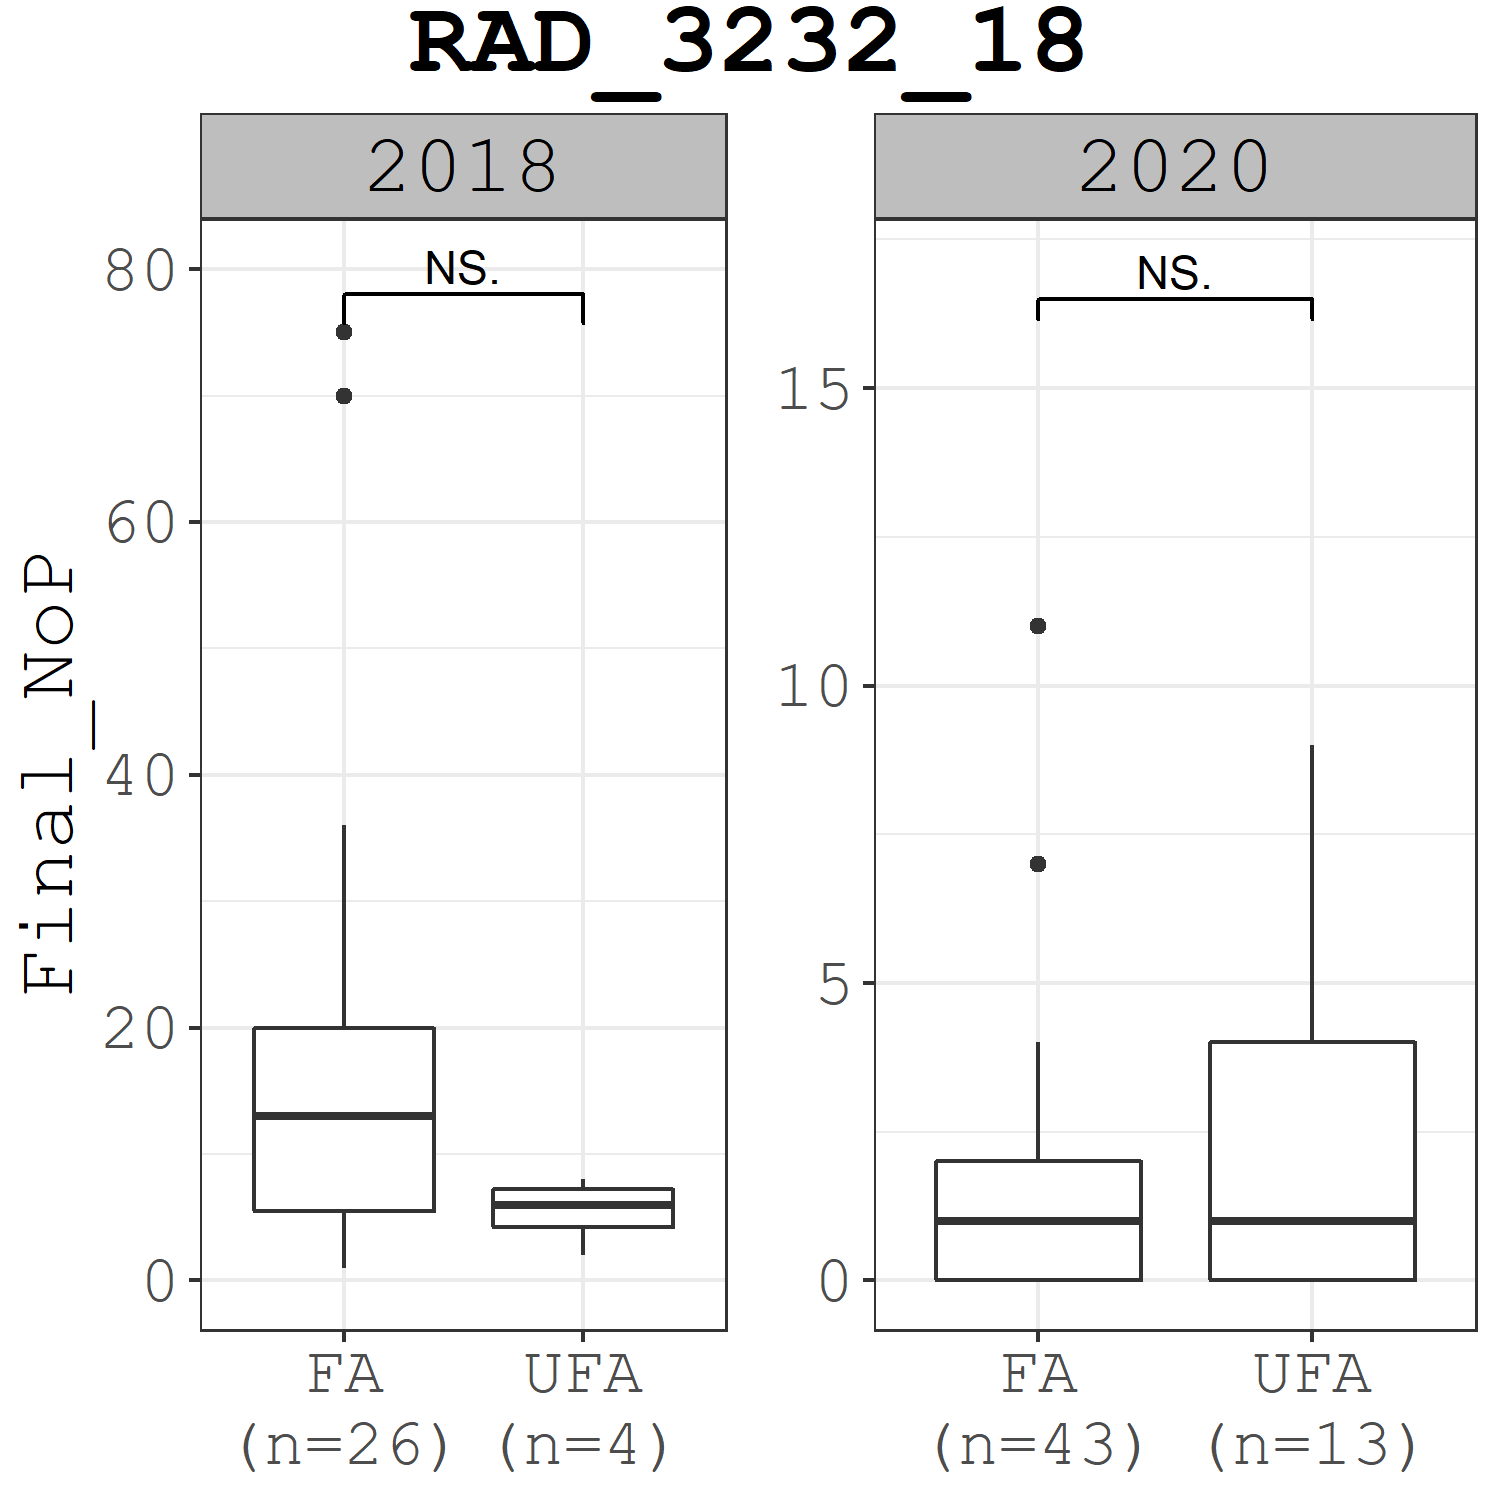

Supplement: s1 [file s1 › Figure S17 RAD_3232_18.png]

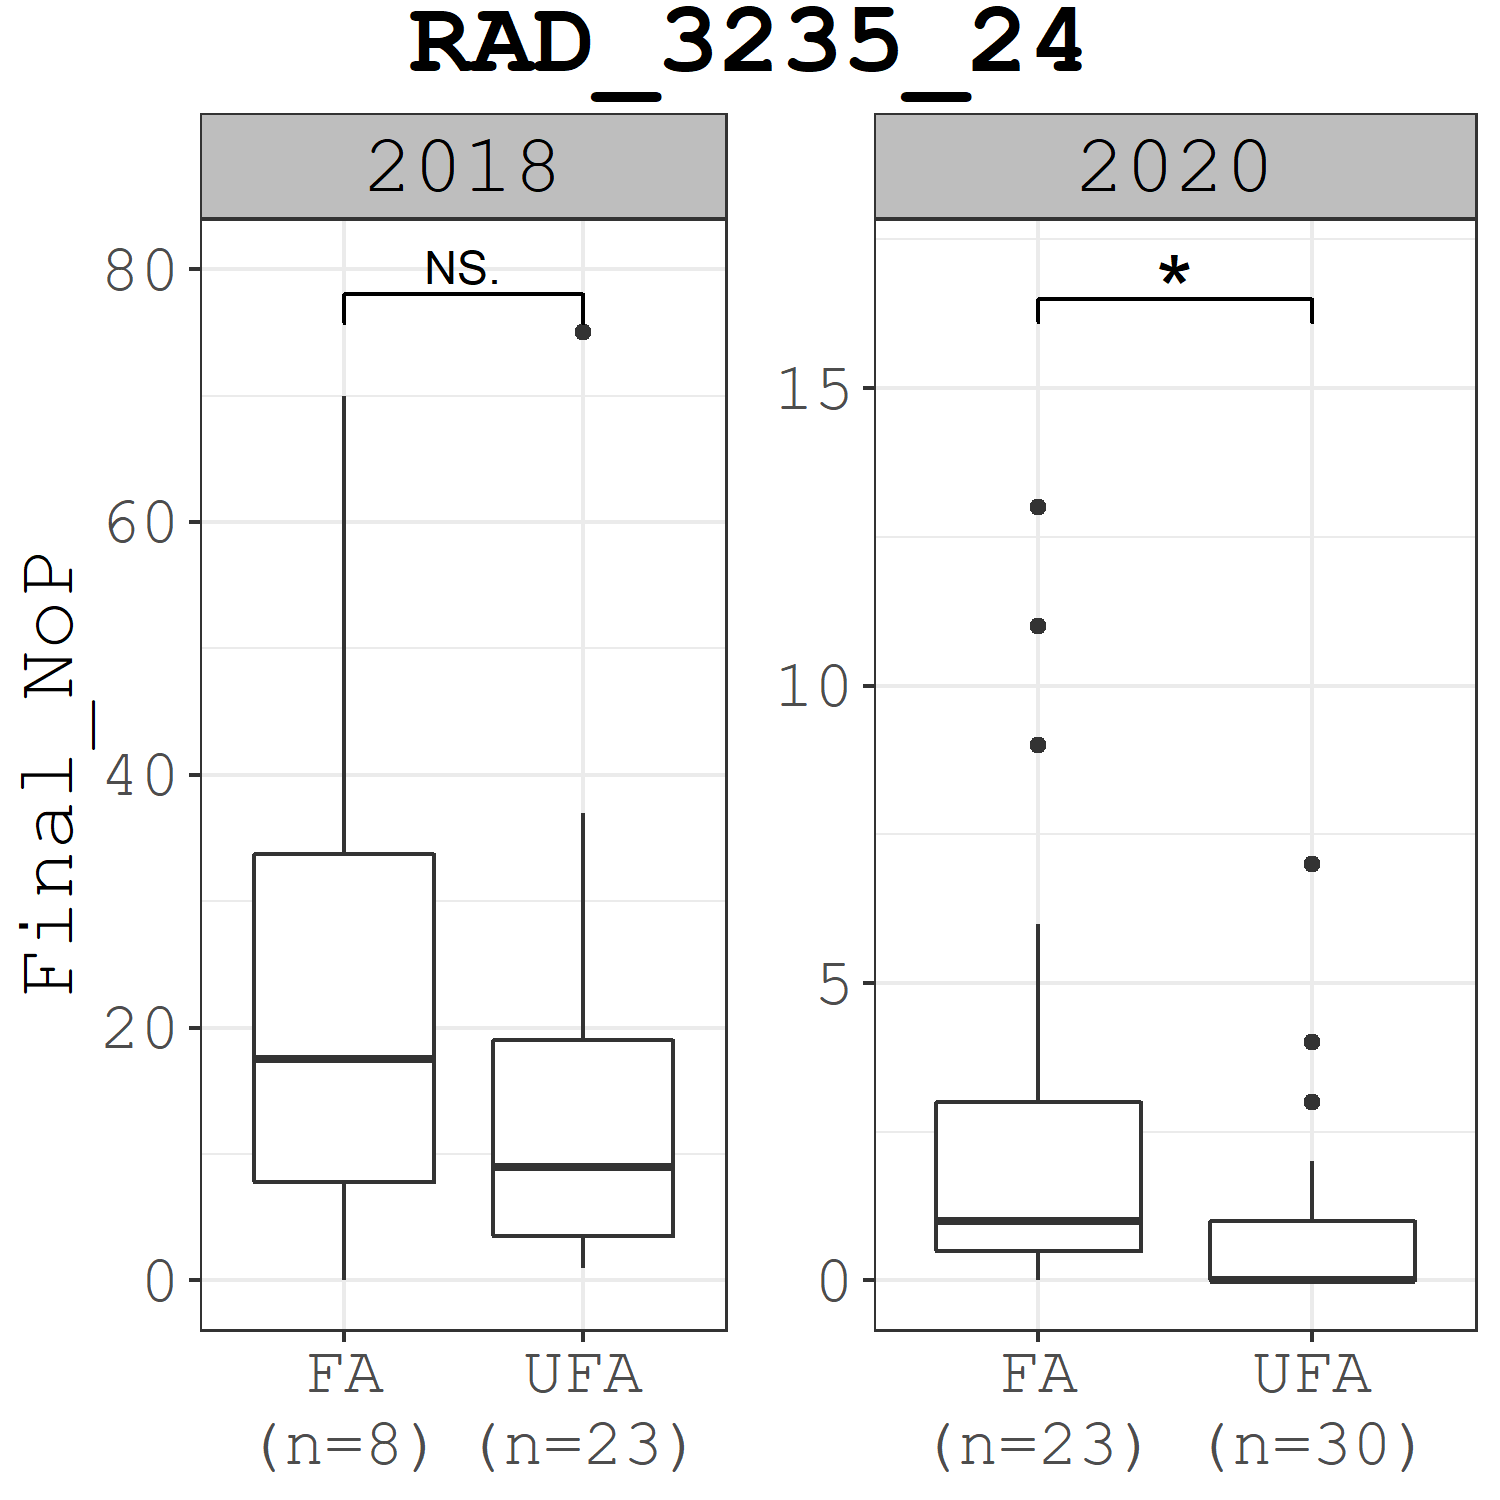

Supplement: s1 [file s1 › Figure S18 RAD_3235_24.png]

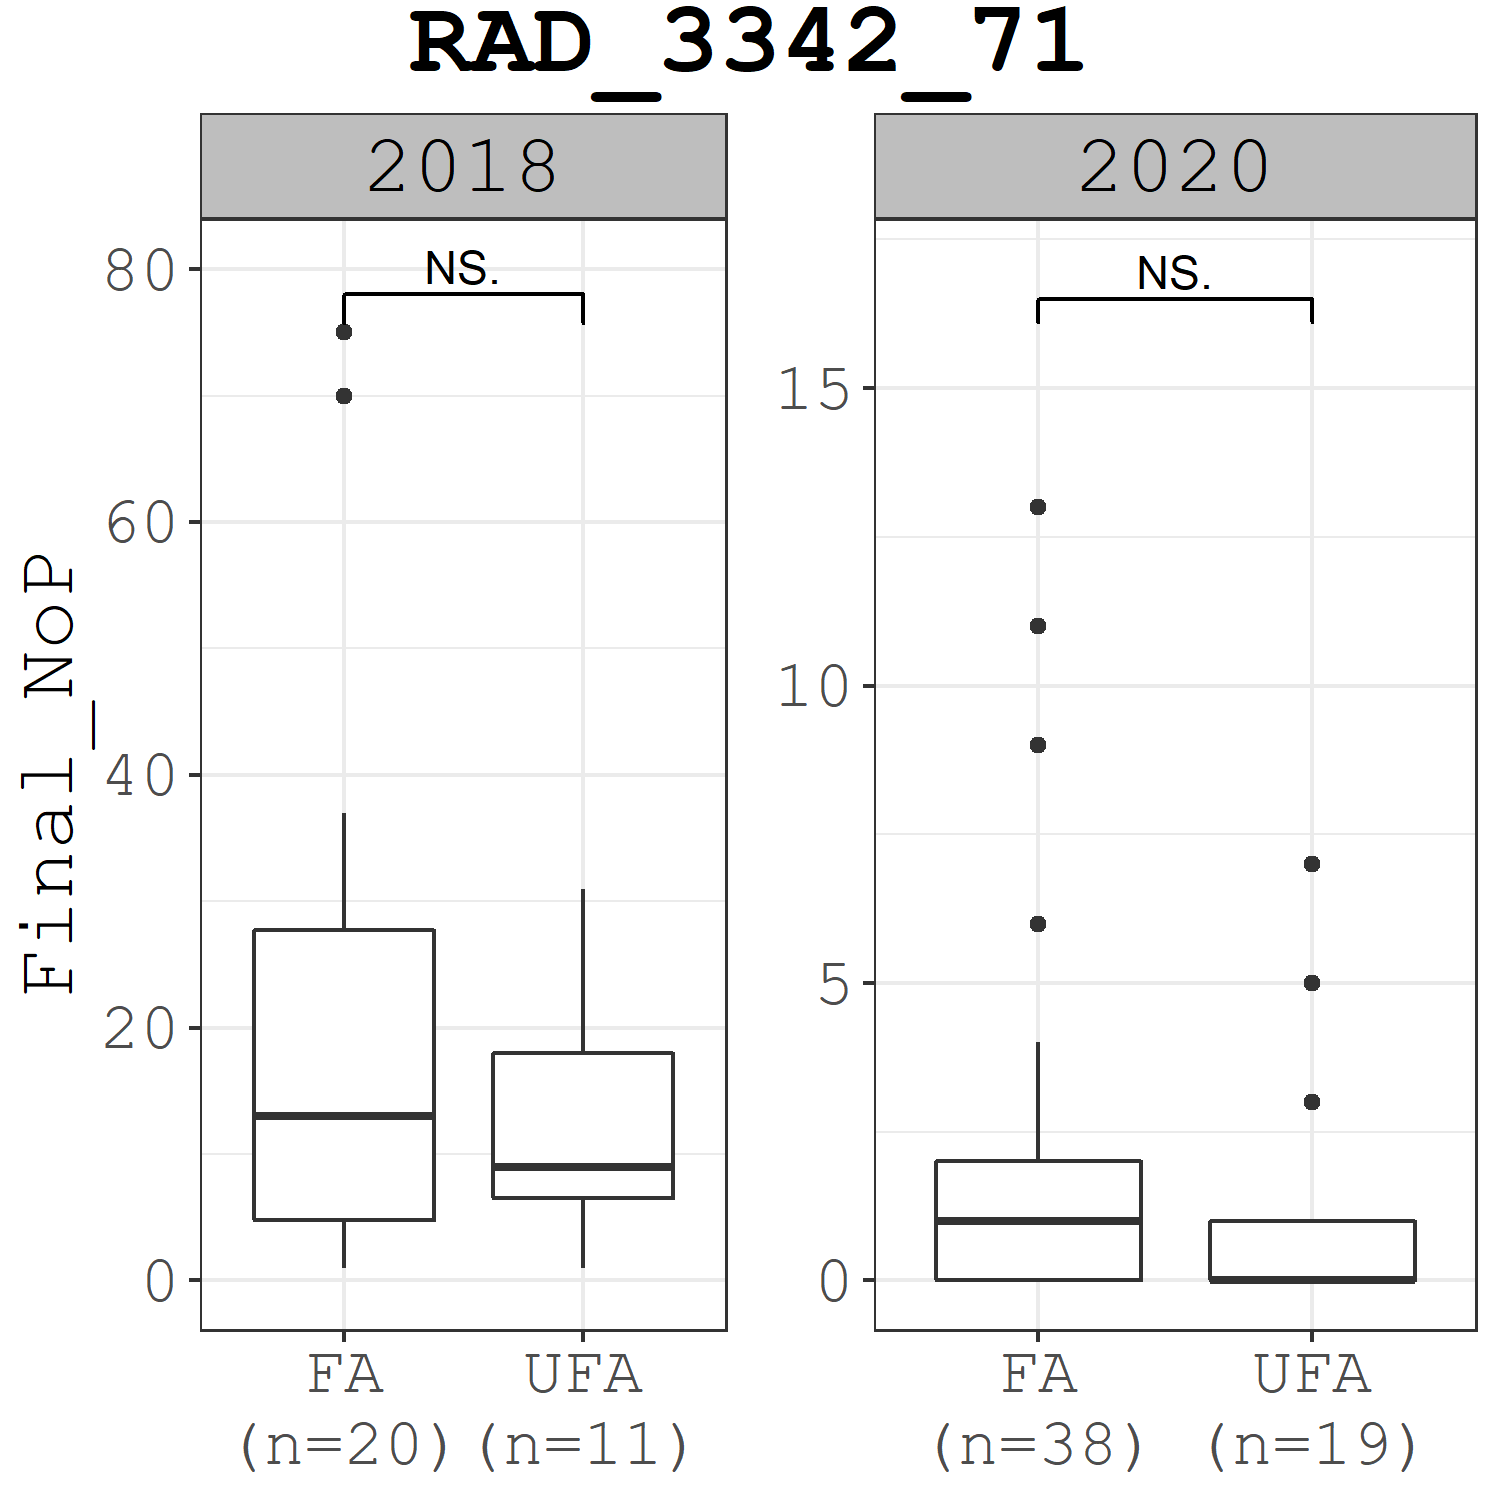

Supplement: s1 [file s1 › Figure S19 RAD_3342_71.png]

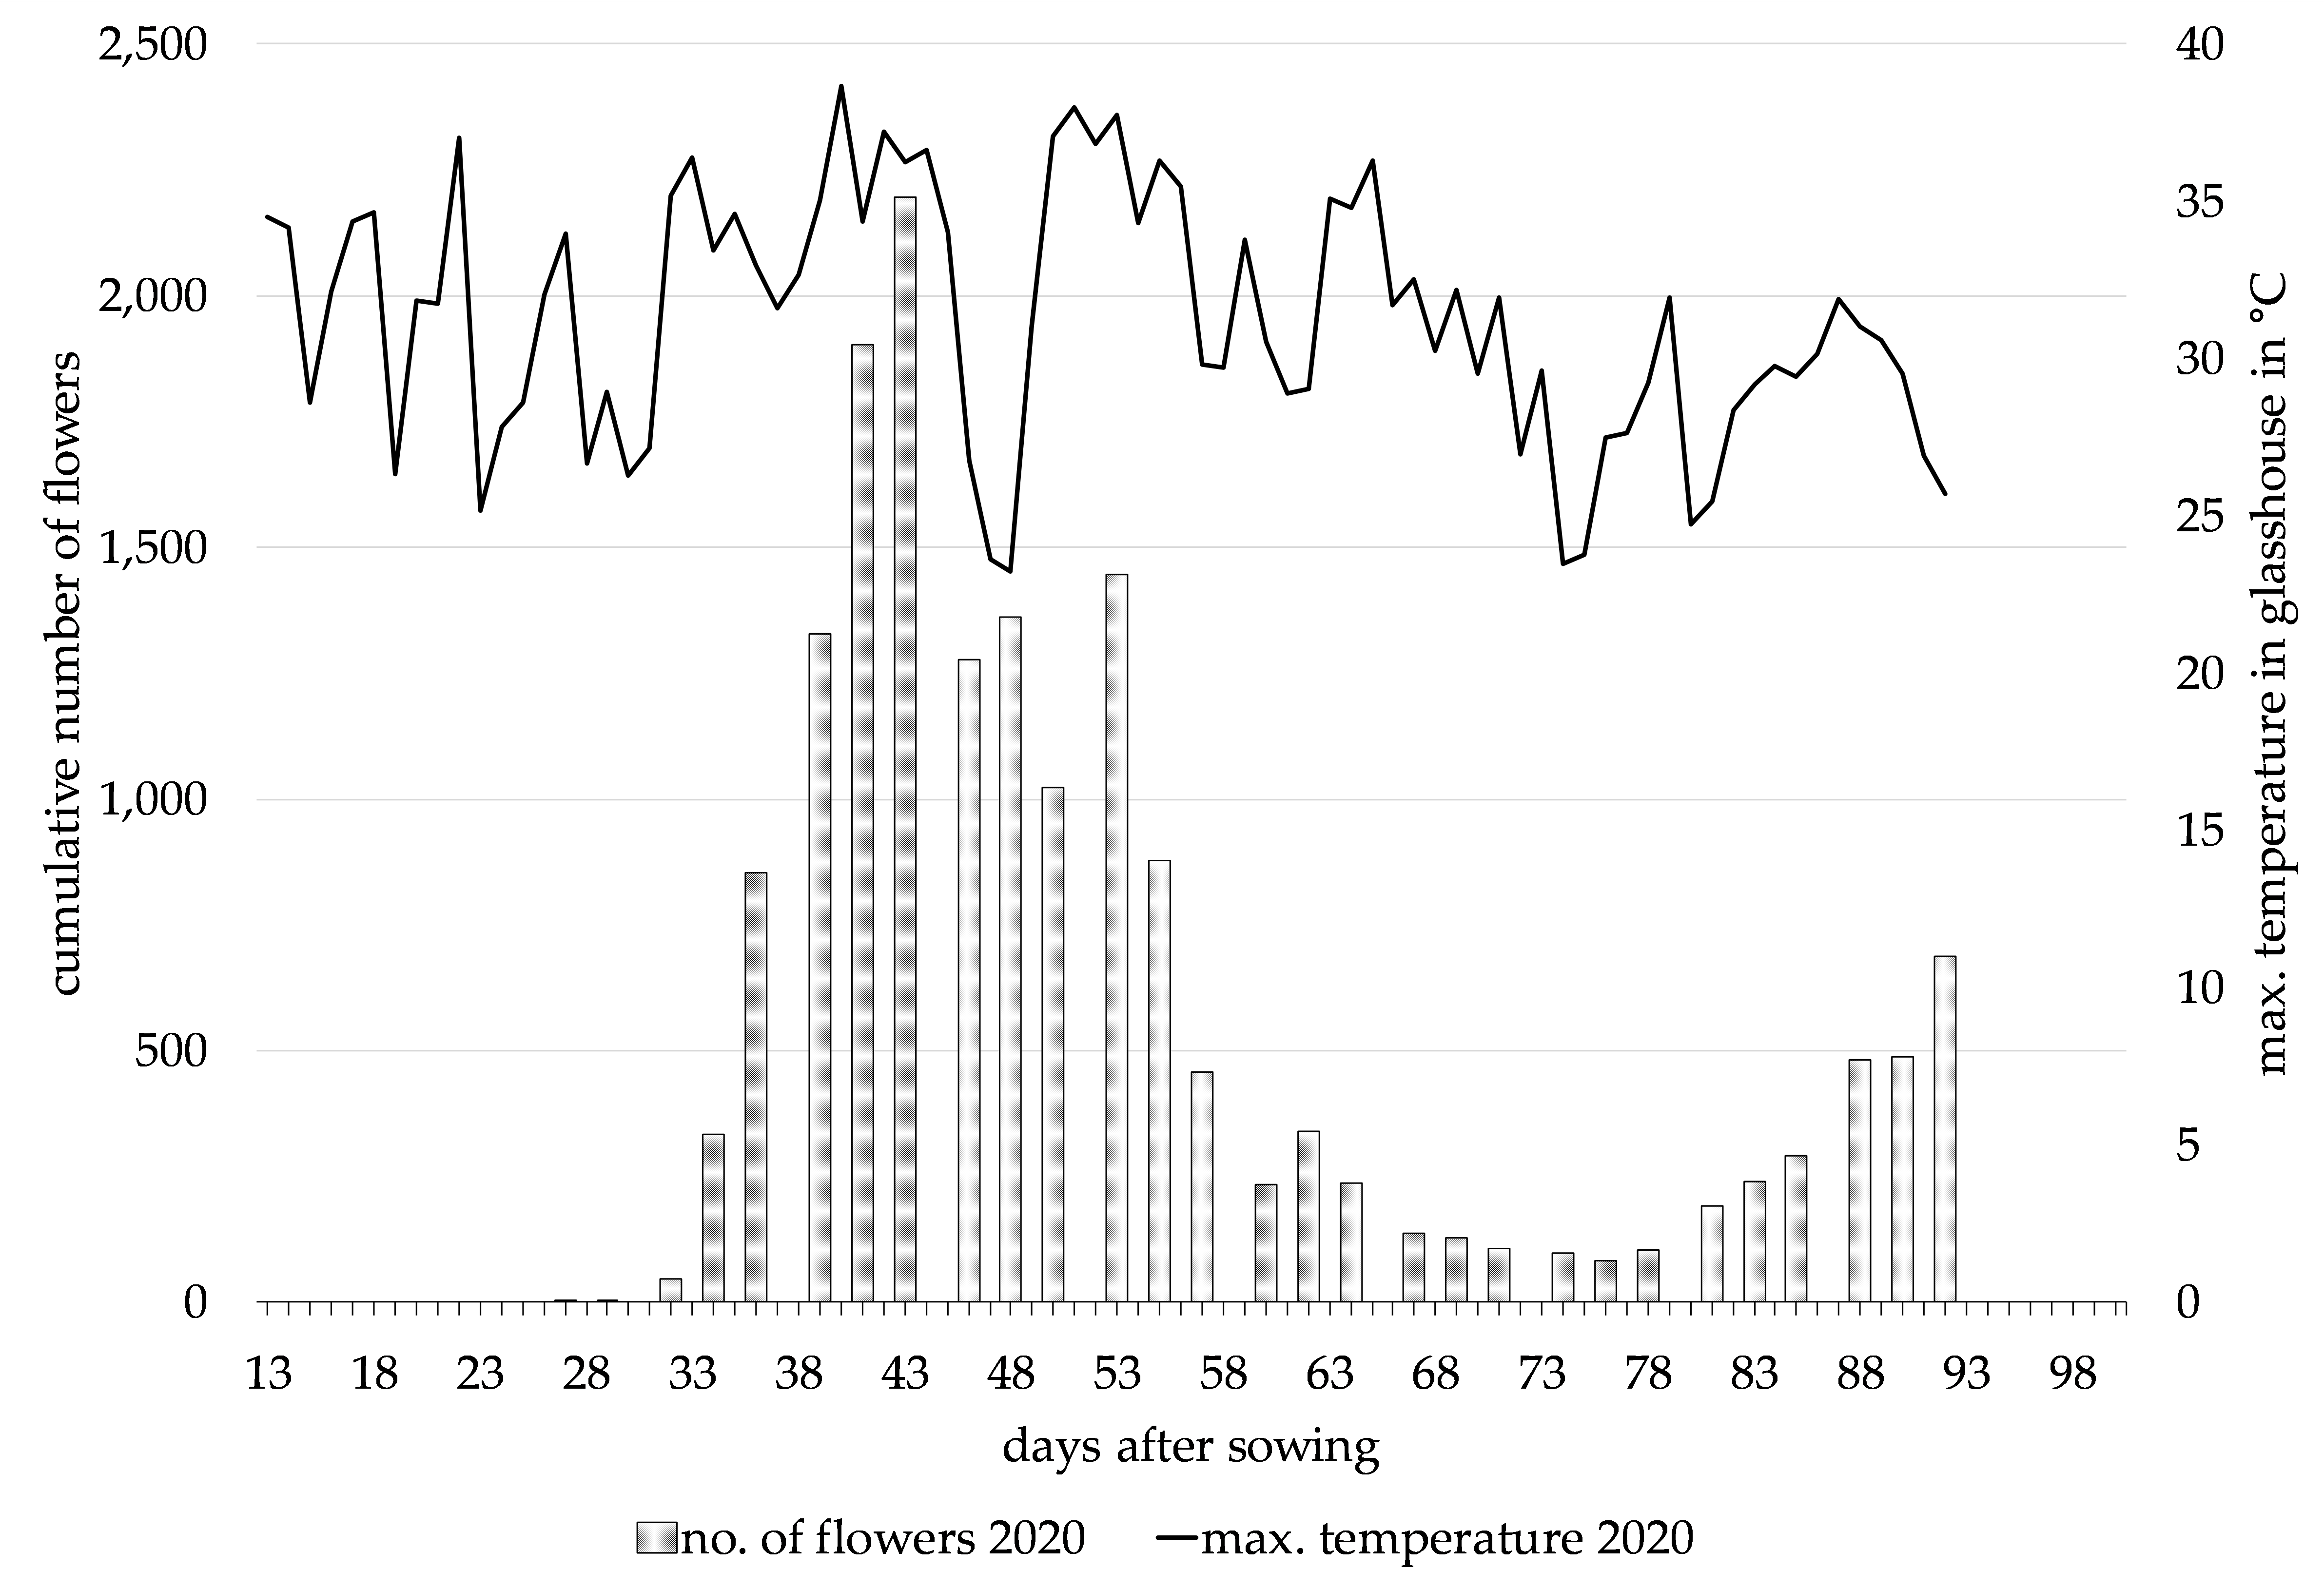

Supplement: s1 [file s1 › Figure S2 Heat and flowers 2020.png]

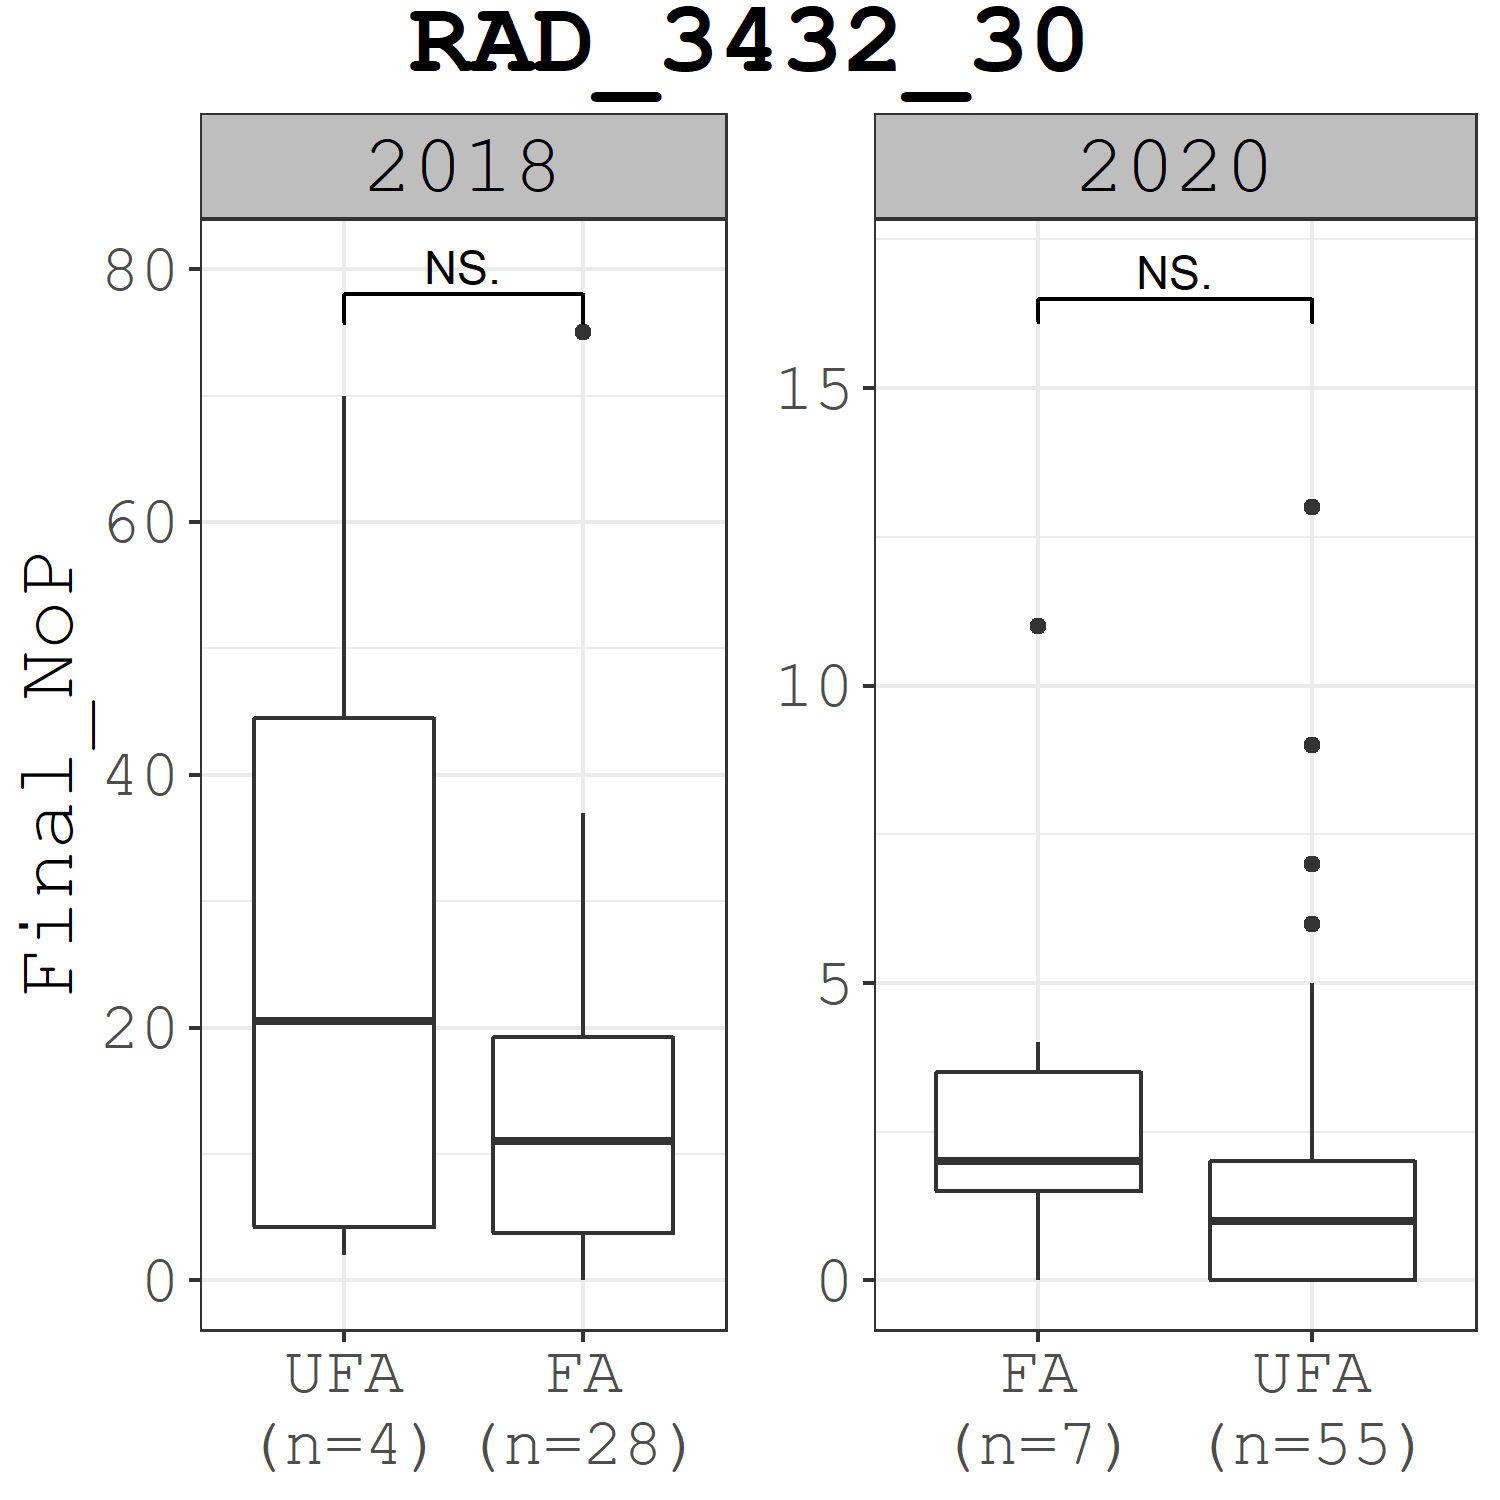

Supplement: s1 [file s1 › Figure S20 RAD_3432_30.png]

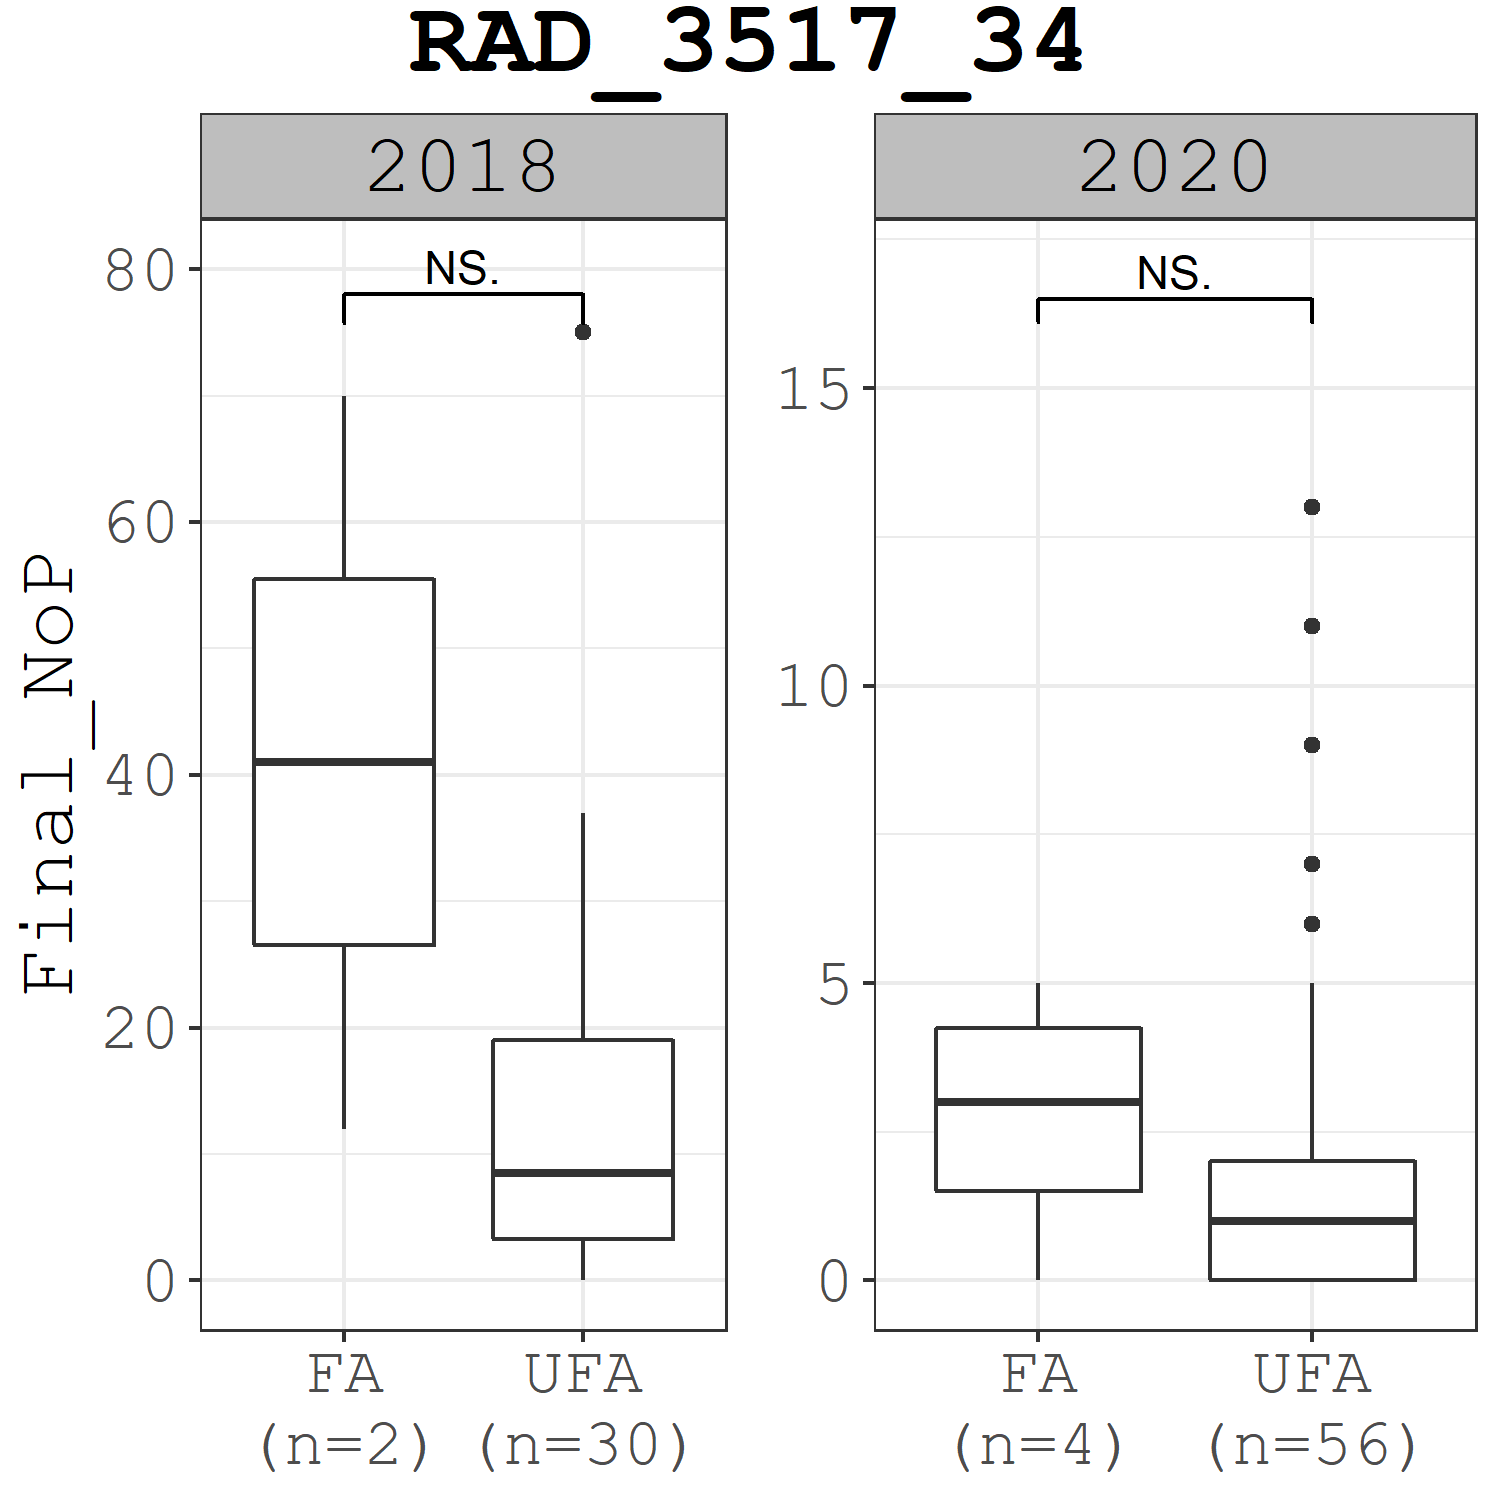

Supplement: s1 [file s1 › Figure S21 RAD_3517_34.png]

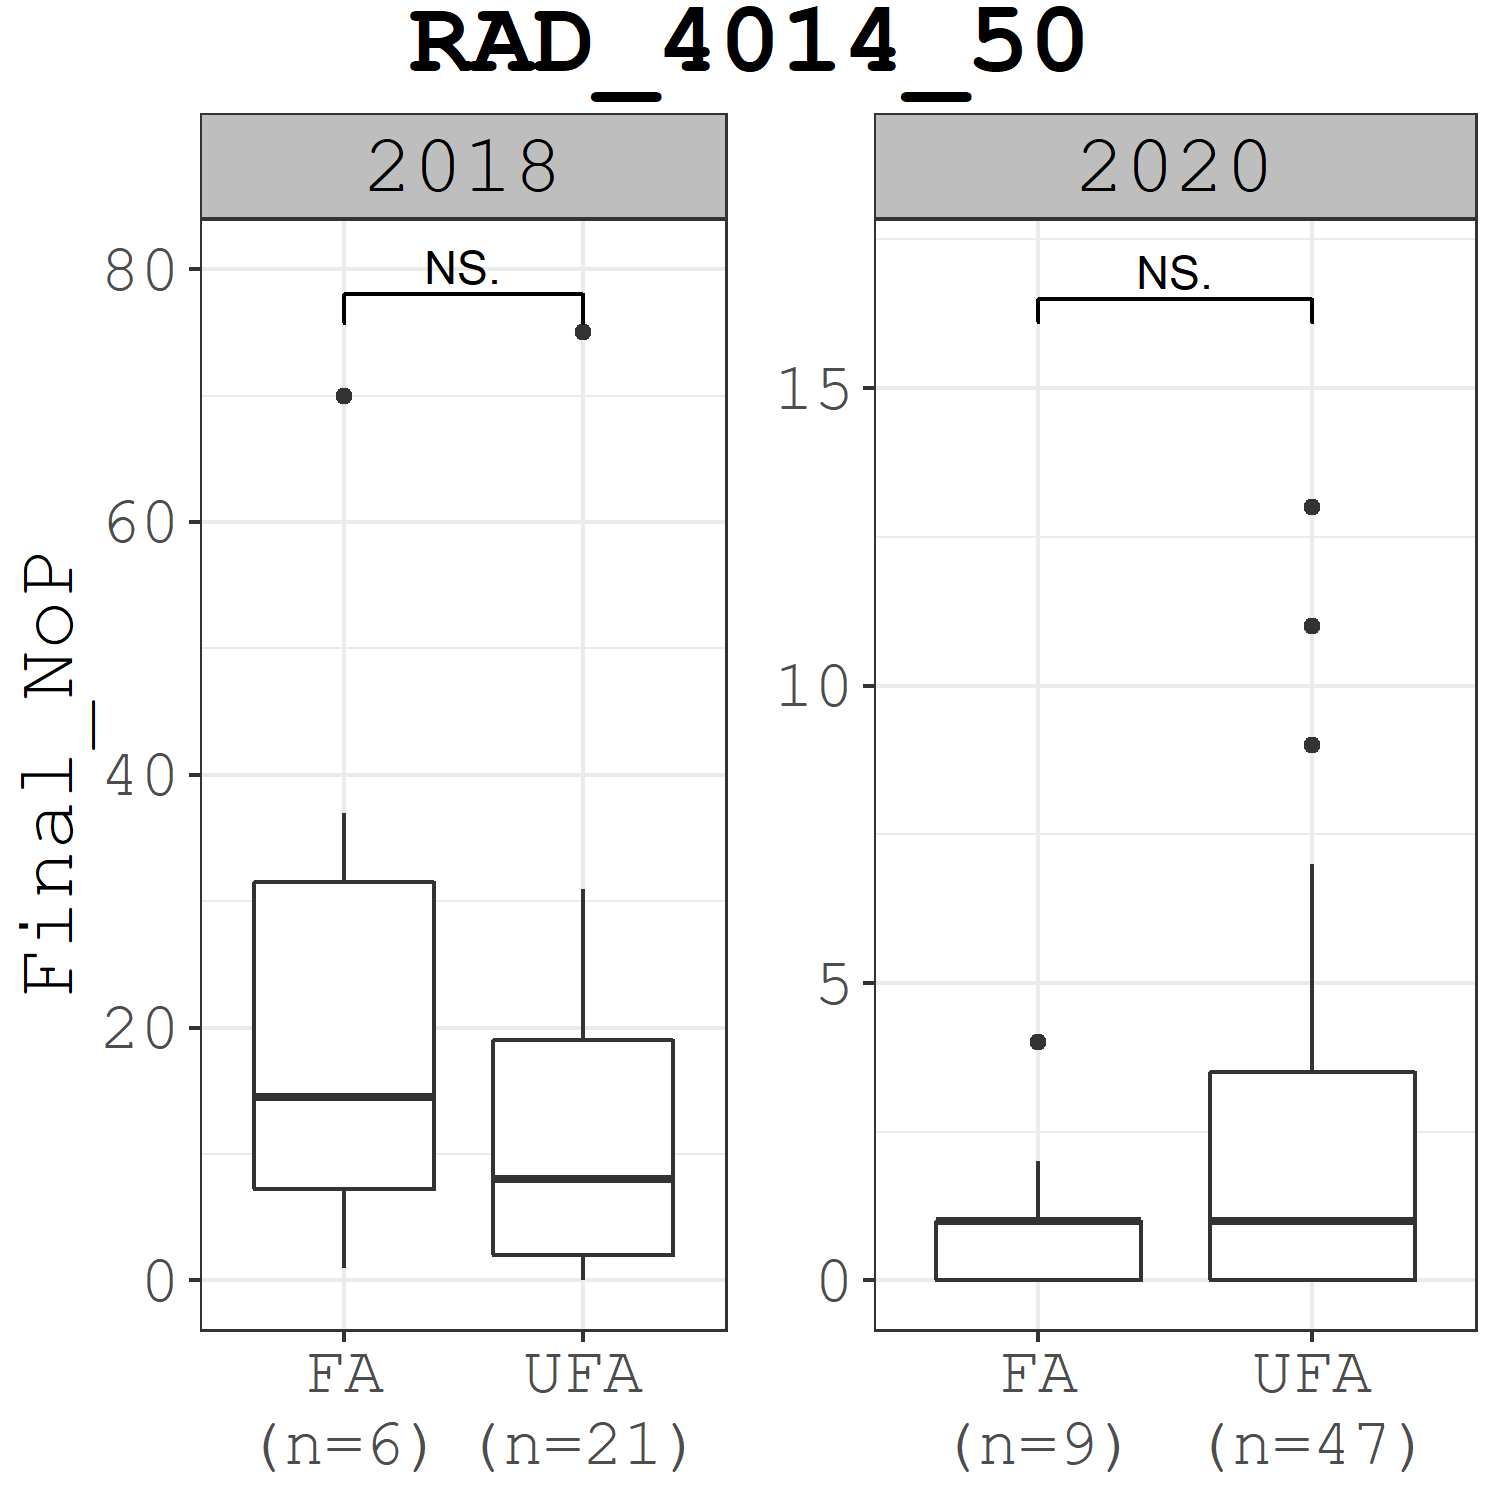

Supplement: s1 [file s1 › Figure S22 RAD_4014_50.png]

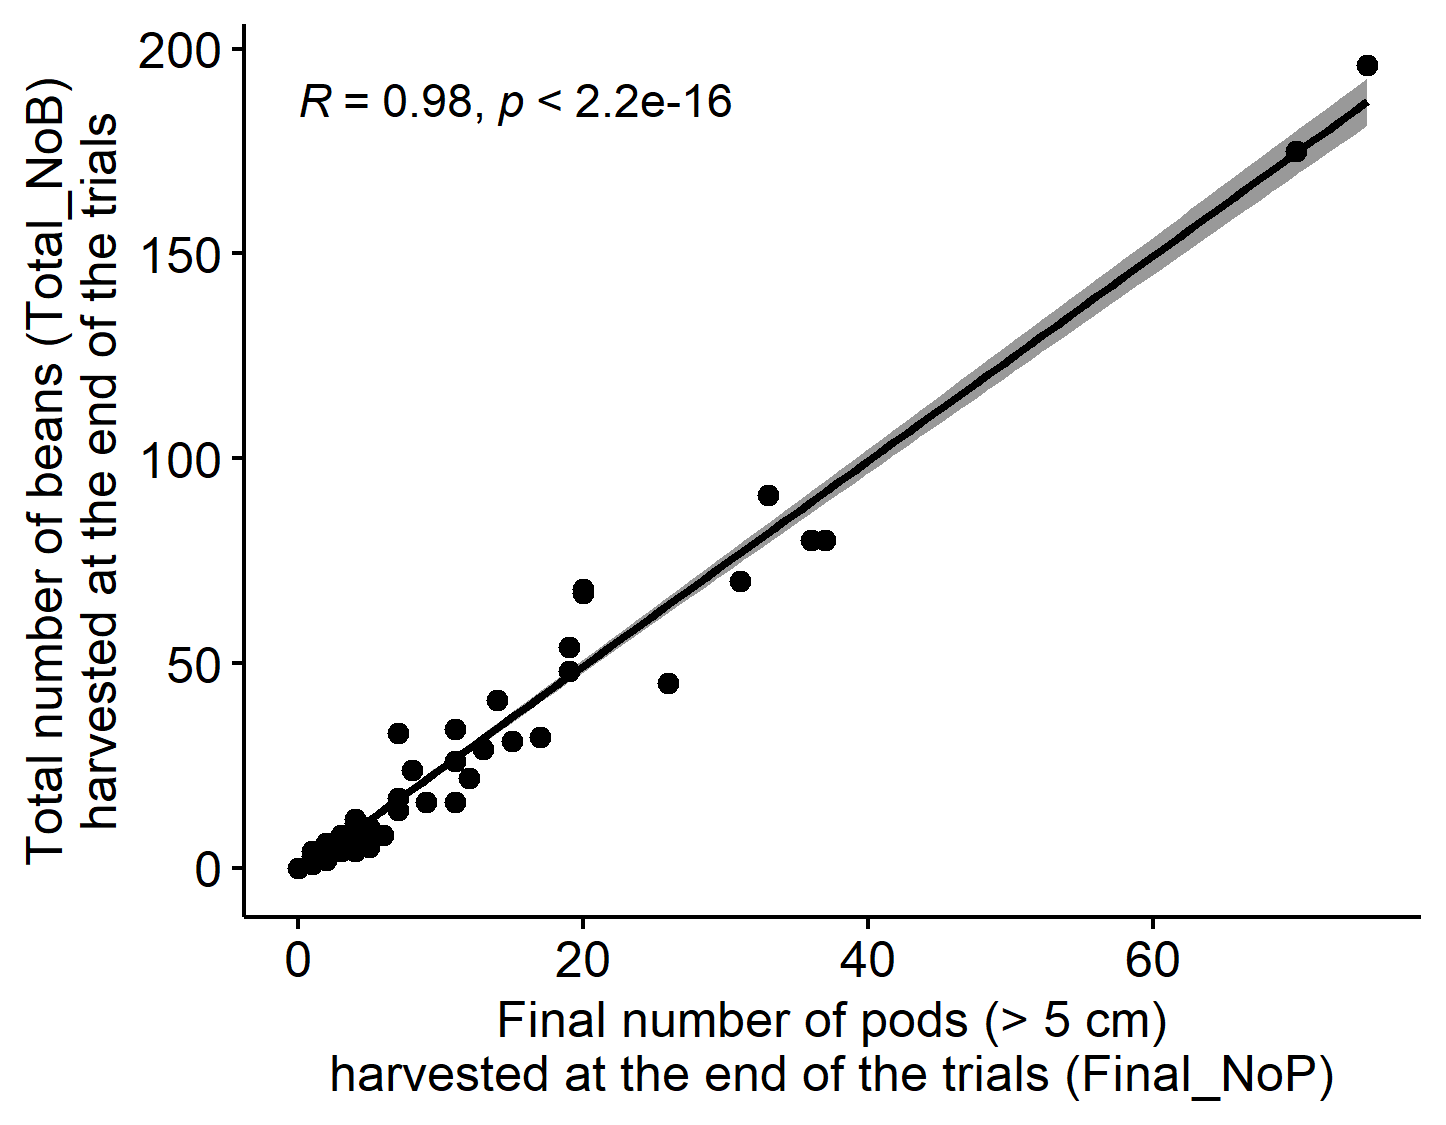

Supplement: s1 [file s1 › Figure S3 Correlation.png]

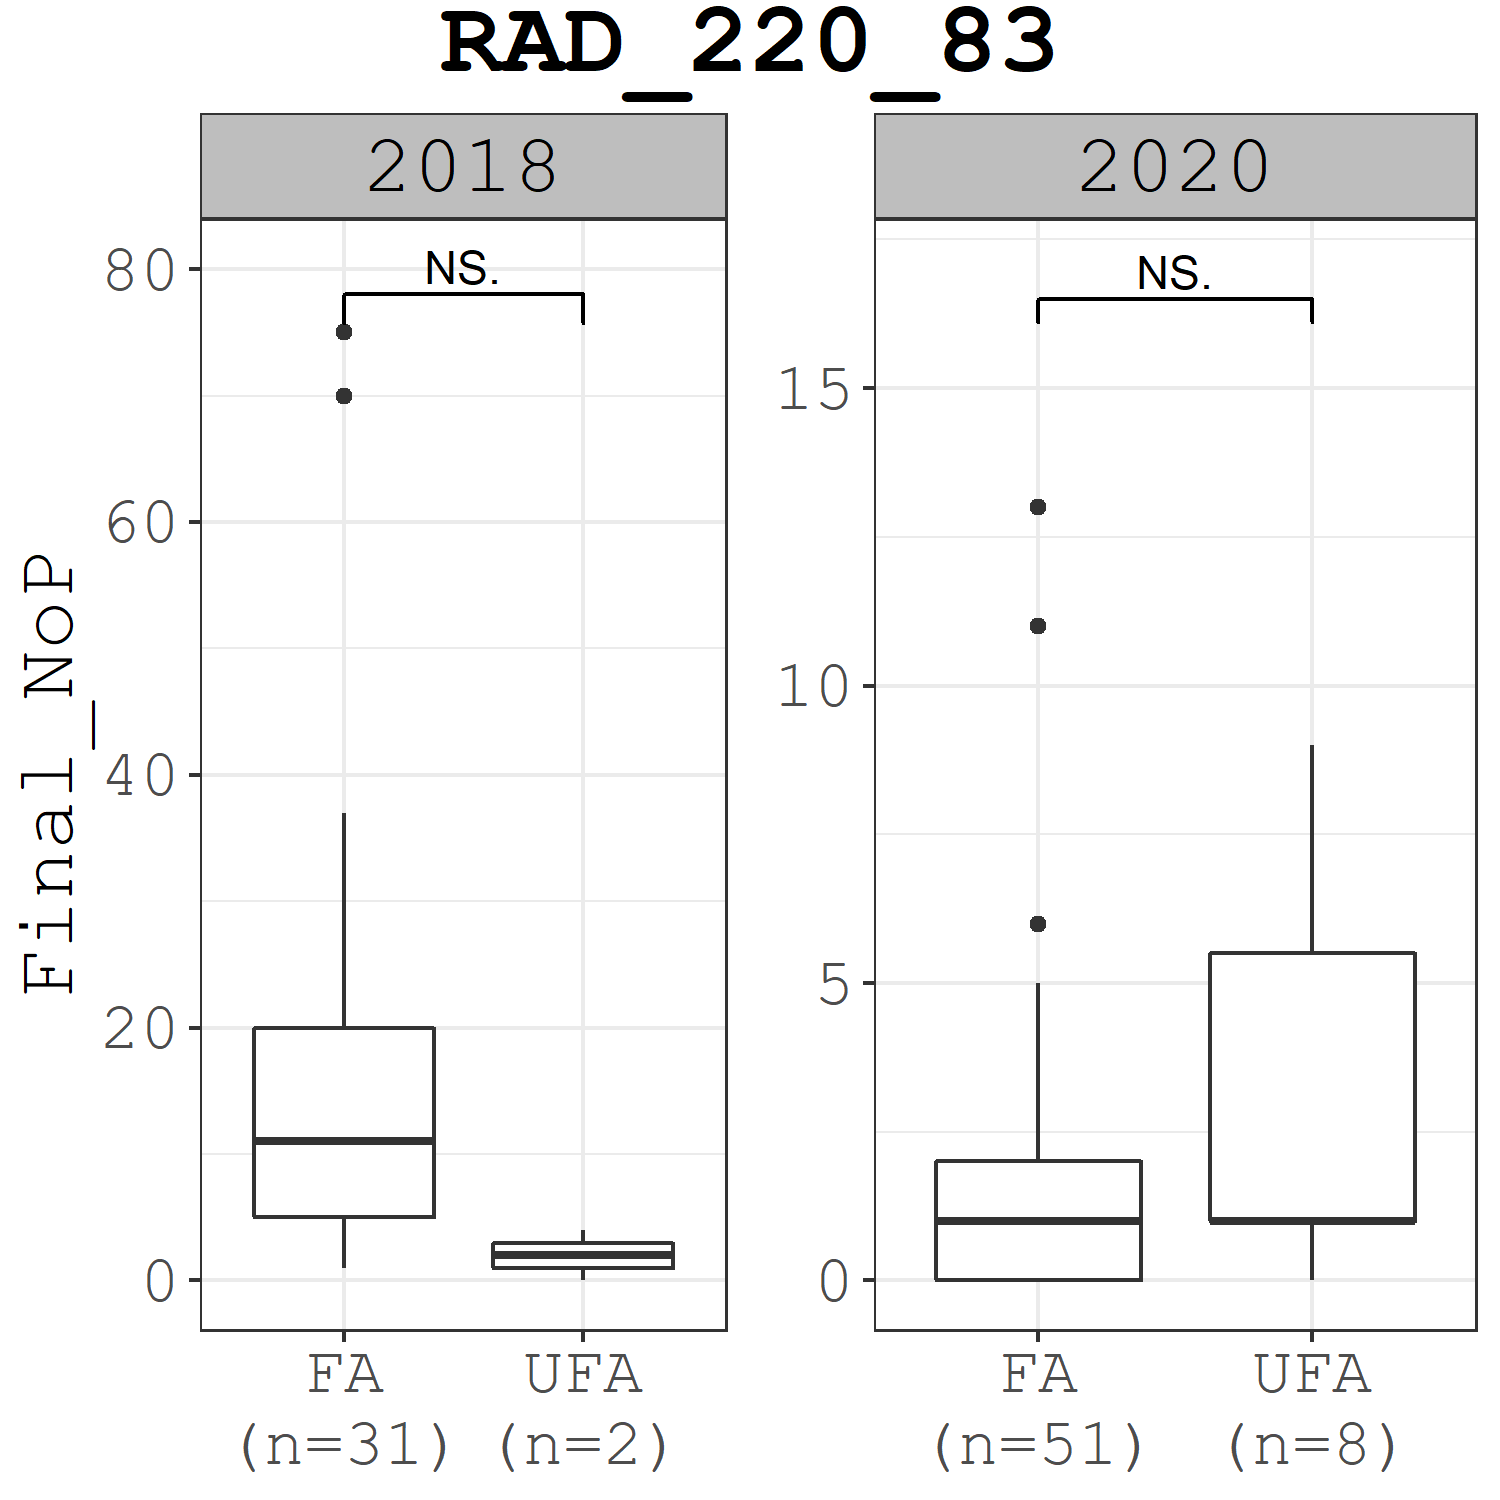

Supplement: s1 [file s1 › Figure S5 RAD_220_83.png]

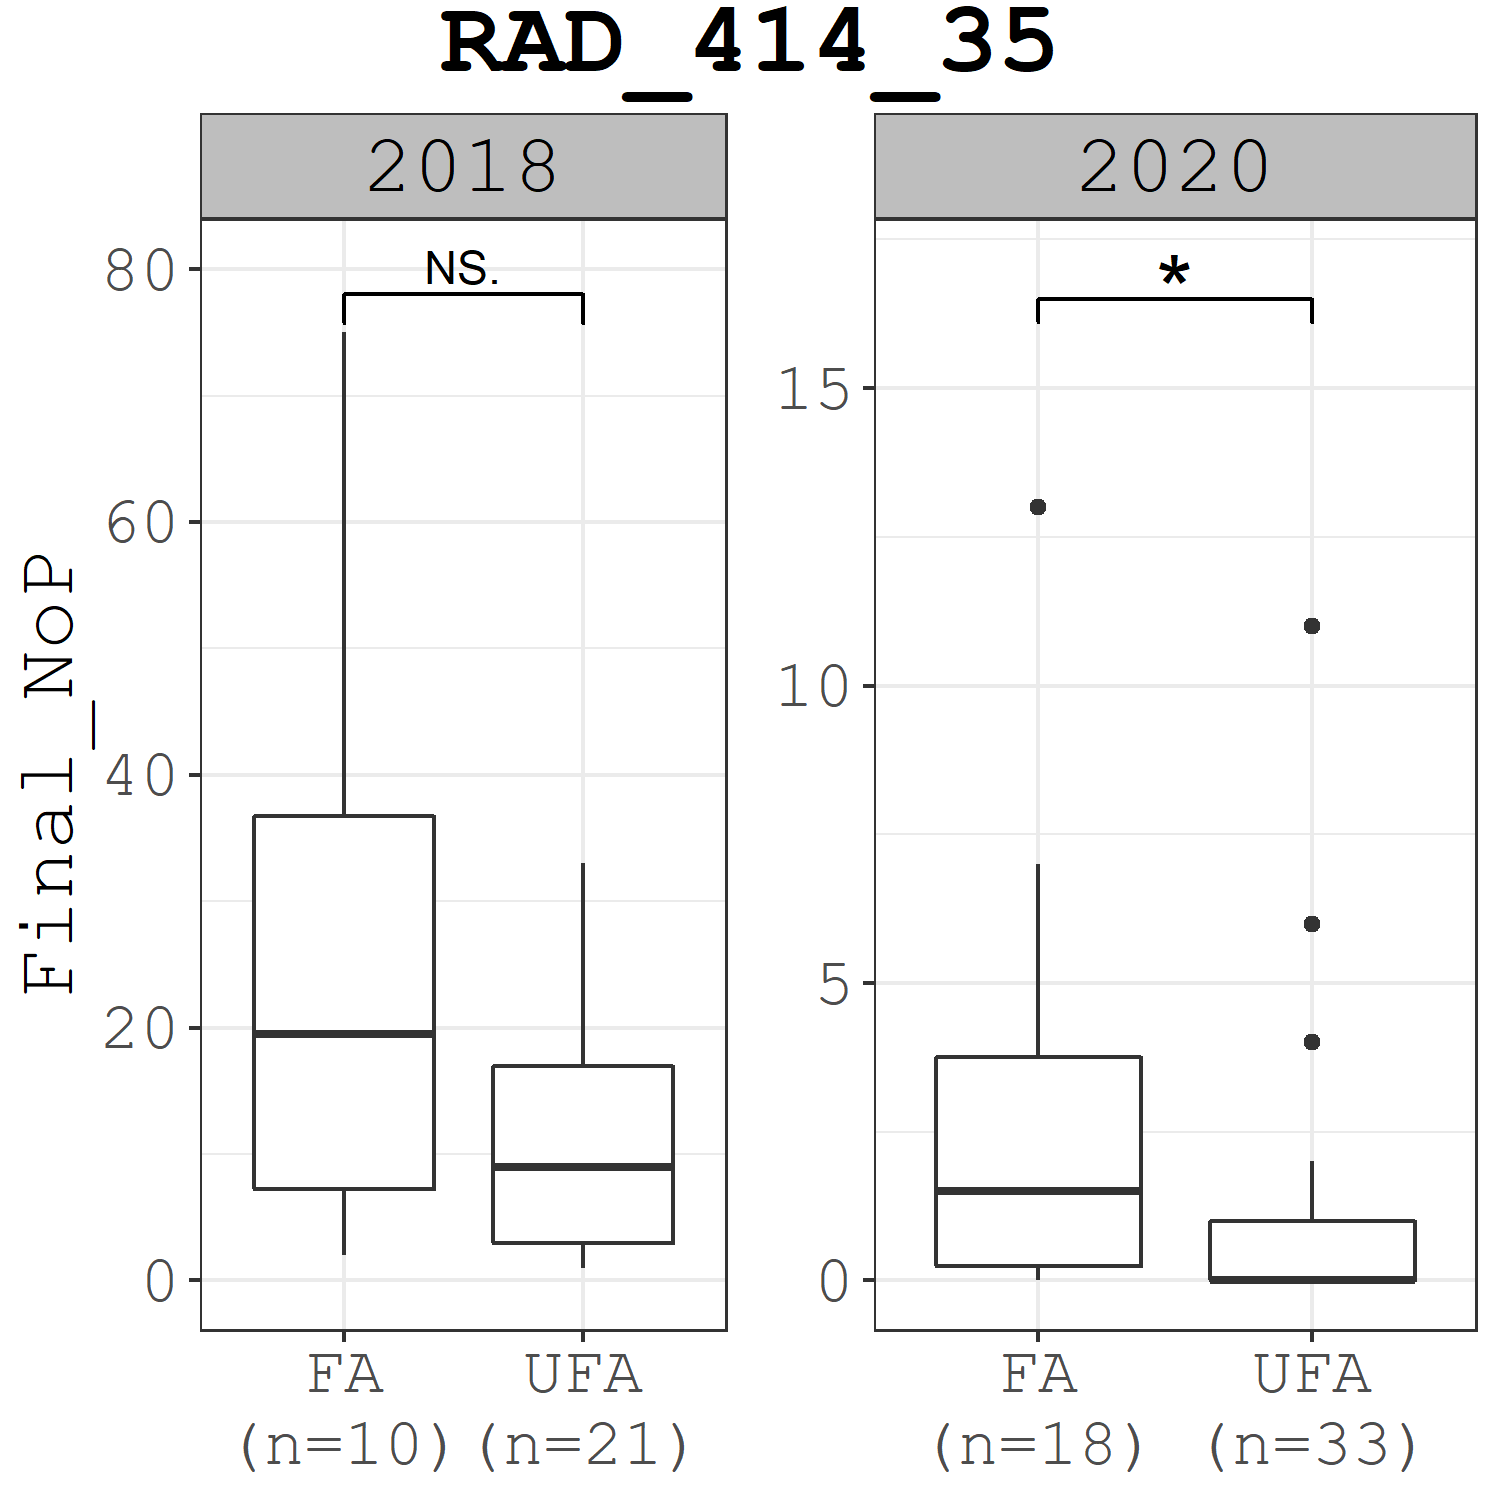

Supplement: s1 [file s1 › Figure S6 RAD_414_35.png]

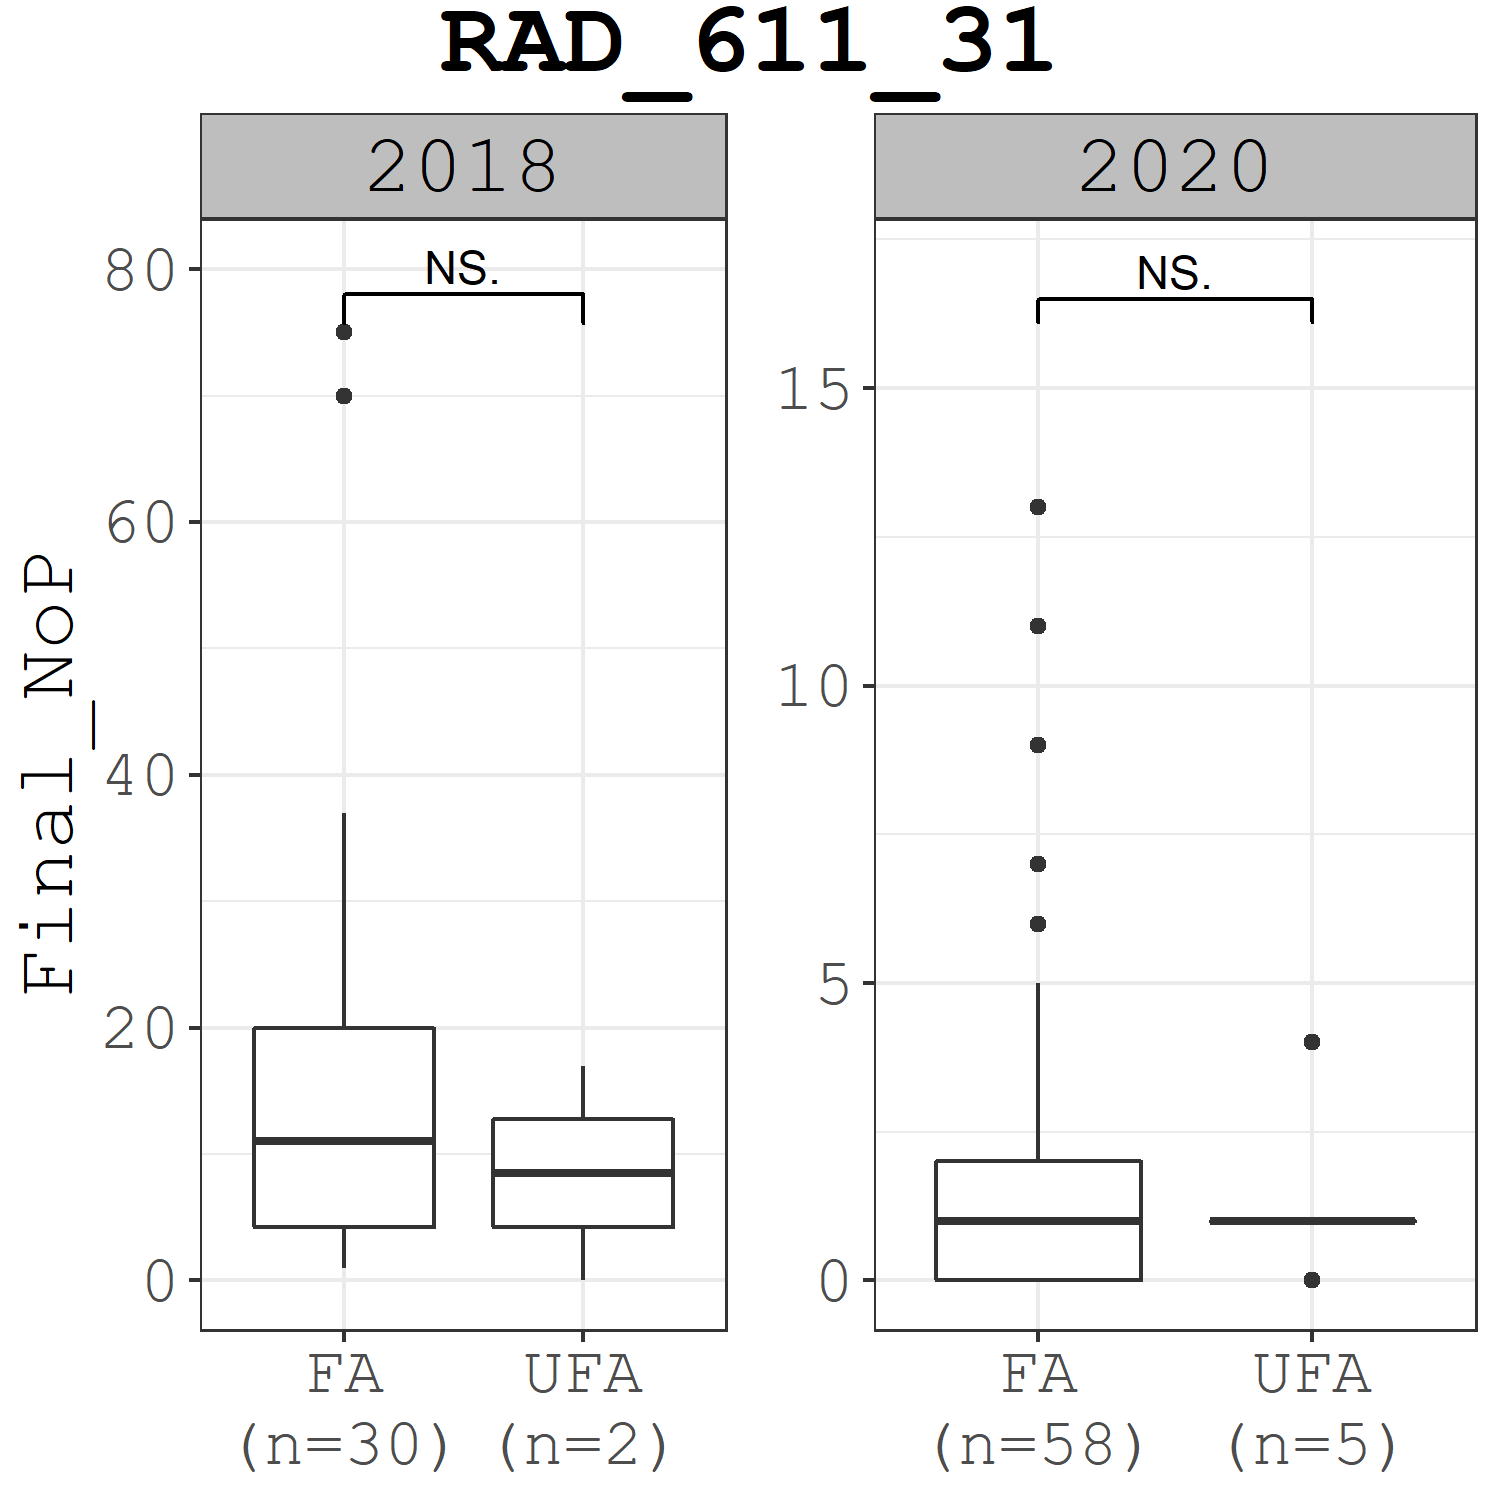

Supplement: s1 [file s1 › Figure S7 RAD_611_31.png]

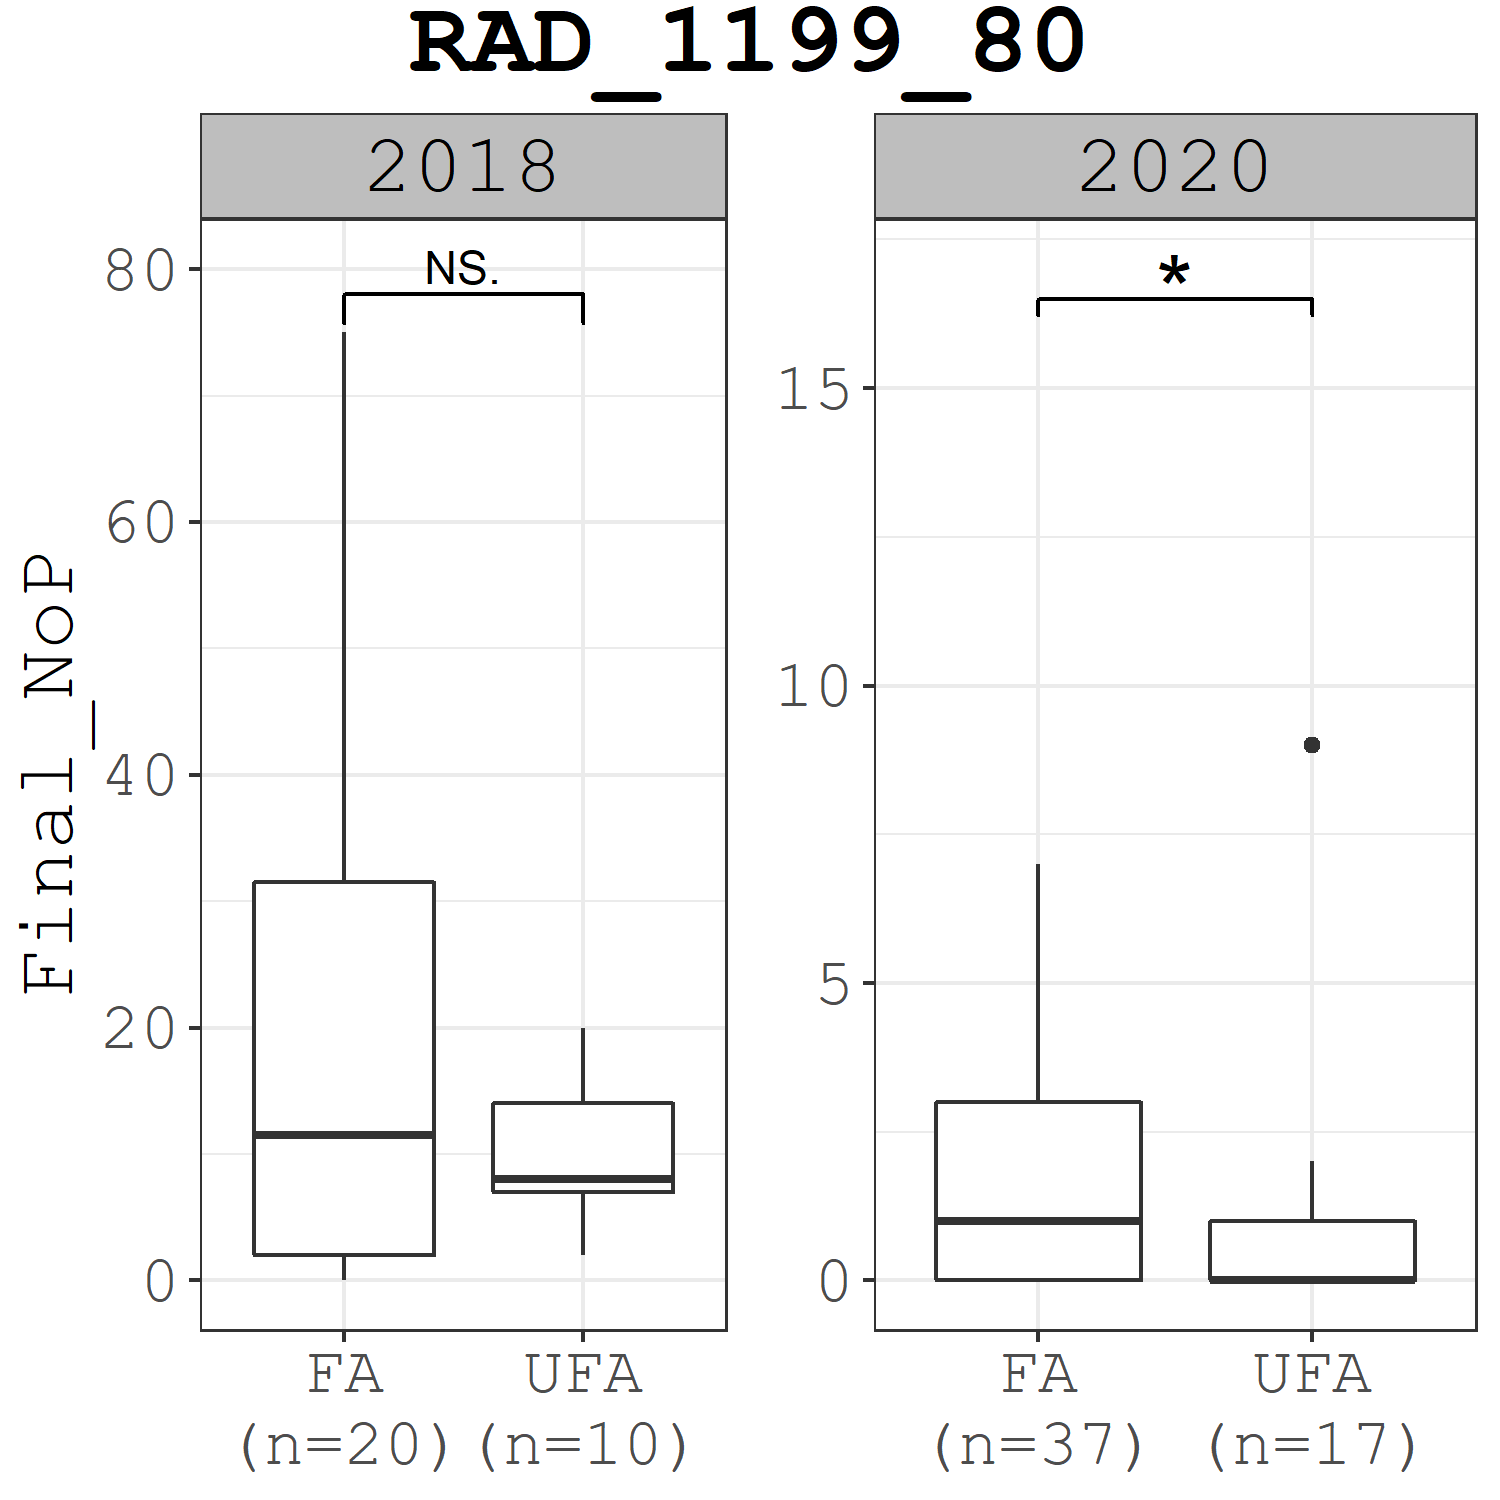

Supplement: s1 [file s1 › Figure S8 RAD_1199_80.png]

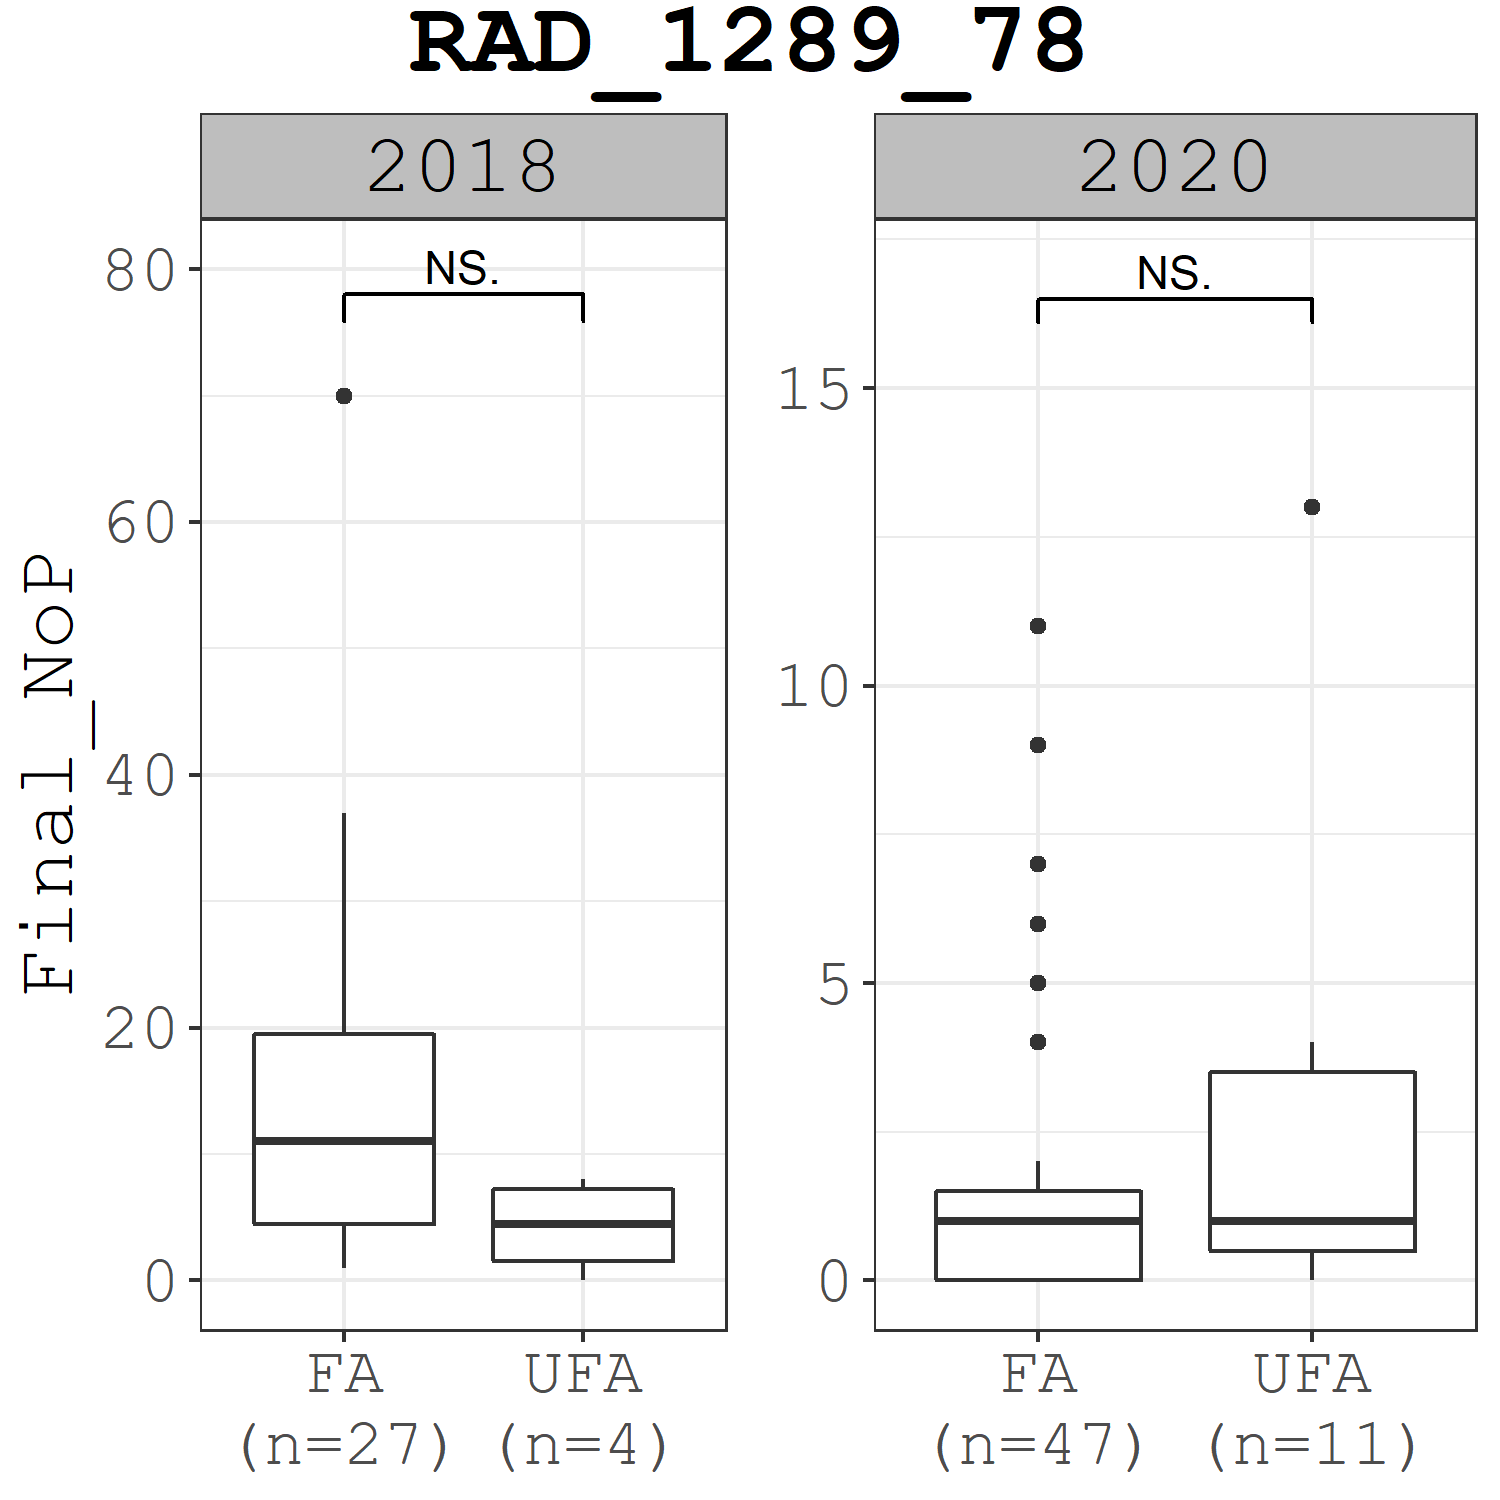

Supplement: s1 [file s1 › Figure S9 RAD_1289_78.png]
